# Supplementary material for: High-quality genome assembles from key Hawaiian coral species
Source: PubMed Central journal article supplement (PMC9646523; doi:10.1093/gigascience/giac098), 2022-11-09

|                              |                                                                                                                                                                                                                                                                                                                                                                                                                                                                                                                                                                                                                                                                                                                                                                                                                                                                                                                                                                                                                                                                                                                                                                                                                                                                                                                                                                                                                                                                                                                                                                                                                                                                                                                                                                                                                                                                                                                                                                         |                           |
|------------------------------|-------------------------------------------------------------------------------------------------------------------------------------------------------------------------------------------------------------------------------------------------------------------------------------------------------------------------------------------------------------------------------------------------------------------------------------------------------------------------------------------------------------------------------------------------------------------------------------------------------------------------------------------------------------------------------------------------------------------------------------------------------------------------------------------------------------------------------------------------------------------------------------------------------------------------------------------------------------------------------------------------------------------------------------------------------------------------------------------------------------------------------------------------------------------------------------------------------------------------------------------------------------------------------------------------------------------------------------------------------------------------------------------------------------------------------------------------------------------------------------------------------------------------------------------------------------------------------------------------------------------------------------------------------------------------------------------------------------------------------------------------------------------------------------------------------------------------------------------------------------------------------------------------------------------------------------------------------------------------|---------------------------|
| <b>Manuscript Number:</b>    | GIGA-D-22-00143                                                                                                                                                                                                                                                                                                                                                                                                                                                                                                                                                                                                                                                                                                                                                                                                                                                                                                                                                                                                                                                                                                                                                                                                                                                                                                                                                                                                                                                                                                                                                                                                                                                                                                                                                                                                                                                                                                                                                         |                           |
| <b>Full Title:</b>           | High-quality genome assemblies from key Hawaiian coral species                                                                                                                                                                                                                                                                                                                                                                                                                                                                                                                                                                                                                                                                                                                                                                                                                                                                                                                                                                                                                                                                                                                                                                                                                                                                                                                                                                                                                                                                                                                                                                                                                                                                                                                                                                                                                                                                                                          |                           |
| <b>Article Type:</b>         | Data Note                                                                                                                                                                                                                                                                                                                                                                                                                                                                                                                                                                                                                                                                                                                                                                                                                                                                                                                                                                                                                                                                                                                                                                                                                                                                                                                                                                                                                                                                                                                                                                                                                                                                                                                                                                                                                                                                                                                                                               |                           |
| <b>Funding Information:</b>  | Paul G. Allen Family Foundation                                                                                                                                                                                                                                                                                                                                                                                                                                                                                                                                                                                                                                                                                                                                                                                                                                                                                                                                                                                                                                                                                                                                                                                                                                                                                                                                                                                                                                                                                                                                                                                                                                                                                                                                                                                                                                                                                                                                         | Dr Eva Majerová           |
|                              | USDA National Institute of Food and Agriculture (1017848)                                                                                                                                                                                                                                                                                                                                                                                                                                                                                                                                                                                                                                                                                                                                                                                                                                                                                                                                                                                                                                                                                                                                                                                                                                                                                                                                                                                                                                                                                                                                                                                                                                                                                                                                                                                                                                                                                                               | Dr Hollie M. Putnam       |
|                              | National Science Foundation (NSF-OCE 1756623)                                                                                                                                                                                                                                                                                                                                                                                                                                                                                                                                                                                                                                                                                                                                                                                                                                                                                                                                                                                                                                                                                                                                                                                                                                                                                                                                                                                                                                                                                                                                                                                                                                                                                                                                                                                                                                                                                                                           | Dr Hollie M. Putnam       |
|                              | National Science Foundation (NSF-OCE 1756616)                                                                                                                                                                                                                                                                                                                                                                                                                                                                                                                                                                                                                                                                                                                                                                                                                                                                                                                                                                                                                                                                                                                                                                                                                                                                                                                                                                                                                                                                                                                                                                                                                                                                                                                                                                                                                                                                                                                           | Dr Debashish Bhattacharya |
|                              | Catalyst Science Fund (2020-008)                                                                                                                                                                                                                                                                                                                                                                                                                                                                                                                                                                                                                                                                                                                                                                                                                                                                                                                                                                                                                                                                                                                                                                                                                                                                                                                                                                                                                                                                                                                                                                                                                                                                                                                                                                                                                                                                                                                                        | Dr Debashish Bhattacharya |
|                              | National Institute of Food and Agriculture and United States Department of Agriculture (NJ01180)                                                                                                                                                                                                                                                                                                                                                                                                                                                                                                                                                                                                                                                                                                                                                                                                                                                                                                                                                                                                                                                                                                                                                                                                                                                                                                                                                                                                                                                                                                                                                                                                                                                                                                                                                                                                                                                                        | Dr Debashish Bhattacharya |
|                              | National Aeronautics and Space Administration (80NSSC19K0462)                                                                                                                                                                                                                                                                                                                                                                                                                                                                                                                                                                                                                                                                                                                                                                                                                                                                                                                                                                                                                                                                                                                                                                                                                                                                                                                                                                                                                                                                                                                                                                                                                                                                                                                                                                                                                                                                                                           | Dr Debashish Bhattacharya |
|                              | Ministry of Oceans and Fisheries (20180430)                                                                                                                                                                                                                                                                                                                                                                                                                                                                                                                                                                                                                                                                                                                                                                                                                                                                                                                                                                                                                                                                                                                                                                                                                                                                                                                                                                                                                                                                                                                                                                                                                                                                                                                                                                                                                                                                                                                             | Dr Hwan Su Yoon           |
|                              | National Research Foundation of Korea (2020R1C1C1010193)                                                                                                                                                                                                                                                                                                                                                                                                                                                                                                                                                                                                                                                                                                                                                                                                                                                                                                                                                                                                                                                                                                                                                                                                                                                                                                                                                                                                                                                                                                                                                                                                                                                                                                                                                                                                                                                                                                                | Dr JunMo Lee              |
|                              | Korea Ministry of Environment (2021003420004)                                                                                                                                                                                                                                                                                                                                                                                                                                                                                                                                                                                                                                                                                                                                                                                                                                                                                                                                                                                                                                                                                                                                                                                                                                                                                                                                                                                                                                                                                                                                                                                                                                                                                                                                                                                                                                                                                                                           | Dr JunMo Lee              |
| <b>Abstract:</b>             | <p><b>Background</b><br/>Coral reefs house about 25% of marine biodiversity and are critical for the livelihood of many communities by providing food, tourism revenue, and protection from wave surge. These magnificent ecosystems are under existential threat from anthropogenic climate change. Whereas extensive ecological and physiological studies have addressed coral response to environmental stress, high-quality reference genome data are lacking for many of these species. The latter issue hinders efforts to understand the genomic and genetic basis of stress resistance and to design informed coral conservation strategies.</p> <p><b>Results</b><br/>We report genome assemblies from four key Hawaiian coral species, <i>Montipora capitata</i>, <i>Pocillopora acuta</i>, <i>Pocillopora meandrina</i>, and <i>Porites compressa</i>. These species, or members of these genera, are distributed worldwide and therefore of broad scientific and ecological importance. For <i>M. capitata</i>, an initial assembly was generated from short-read Illumina and long-read PacBio data, which was then scaffolded into 14 putative chromosomes using Omni-C sequencing. For <i>Poc. acuta</i>, <i>Poc. meandrina</i>, and <i>Por. compressa</i>, high-quality assemblies were generated using short-read Illumina and long-read PacBio data. The <i>Poc. acuta</i> assembly is from a triploid individual, making it the first reference genome of a non-diploid coral animal.</p> <p><b>Conclusions</b><br/>These assemblies are significant improvements over available data and provide invaluable resources for supporting multi-omics studies into coral biology, not just in Hawai'i, but also in other regions, where related species exist. The <i>Poc. acuta</i> assembly gives us, for the first time, a platform for studying polyploidy in corals, and its role in genome evolution and stress adaptation in these organisms.</p> |                           |
| <b>Corresponding Author:</b> | Timothy Gordon Stephens, Ph.D.<br>Rutgers University: Rutgers The State University of New Jersey<br>New Brunswick, New Jersey UNITED STATES                                                                                                                                                                                                                                                                                                                                                                                                                                                                                                                                                                                                                                                                                                                                                                                                                                                                                                                                                                                                                                                                                                                                                                                                                                                                                                                                                                                                                                                                                                                                                                                                                                                                                                                                                                                                                             |                           |

|                                                                                                                                                                                                                                                                                                                                                                                   |                                                                |
|-----------------------------------------------------------------------------------------------------------------------------------------------------------------------------------------------------------------------------------------------------------------------------------------------------------------------------------------------------------------------------------|----------------------------------------------------------------|
| <b>Corresponding Author Secondary Information:</b>                                                                                                                                                                                                                                                                                                                                |                                                                |
| <b>Corresponding Author's Institution:</b>                                                                                                                                                                                                                                                                                                                                        | Rutgers University: Rutgers The State University of New Jersey |
| <b>Corresponding Author's Secondary Institution:</b>                                                                                                                                                                                                                                                                                                                              |                                                                |
| <b>First Author:</b>                                                                                                                                                                                                                                                                                                                                                              | Timothy Gordon Stephens, Ph.D.                                 |
| <b>First Author Secondary Information:</b>                                                                                                                                                                                                                                                                                                                                        |                                                                |
| <b>Order of Authors:</b>                                                                                                                                                                                                                                                                                                                                                          | Timothy Gordon Stephens, Ph.D.                                 |
|                                                                                                                                                                                                                                                                                                                                                                                   | JunMo Lee                                                      |
|                                                                                                                                                                                                                                                                                                                                                                                   | YuJin Jeong                                                    |
|                                                                                                                                                                                                                                                                                                                                                                                   | Hwan Su Yoon                                                   |
|                                                                                                                                                                                                                                                                                                                                                                                   | Hollie M. Putnam                                               |
|                                                                                                                                                                                                                                                                                                                                                                                   | Eva Majerová                                                   |
|                                                                                                                                                                                                                                                                                                                                                                                   | Debashish Bhattacharya                                         |
| <b>Order of Authors Secondary Information:</b>                                                                                                                                                                                                                                                                                                                                    |                                                                |
| <b>Additional Information:</b>                                                                                                                                                                                                                                                                                                                                                    |                                                                |
| <b>Question</b>                                                                                                                                                                                                                                                                                                                                                                   | <b>Response</b>                                                |
| Are you submitting this manuscript to a special series or article collection?                                                                                                                                                                                                                                                                                                     | No                                                             |
| <b>Experimental design and statistics</b>                                                                                                                                                                                                                                                                                                                                         | Yes                                                            |
| <p>Full details of the experimental design and statistical methods used should be given in the Methods section, as detailed in our <a href="#">Minimum Standards Reporting Checklist</a>. Information essential to interpreting the data presented should be made available in the figure legends.</p> <p>Have you included all the information requested in your manuscript?</p> |                                                                |
| <b>Resources</b>                                                                                                                                                                                                                                                                                                                                                                  | Yes                                                            |
| <p>A description of all resources used, including antibodies, cell lines, animals and software tools, with enough information to allow them to be uniquely identified, should be included in the Methods section. Authors are strongly encouraged to cite <a href="#">Research Resource Identifiers</a> (RRIDs) for antibodies, model organisms and tools, where possible.</p>    |                                                                |

|                                                                                                                                                                                                                                                                                                                                                                                                                                                                                                                                                         |            |
|---------------------------------------------------------------------------------------------------------------------------------------------------------------------------------------------------------------------------------------------------------------------------------------------------------------------------------------------------------------------------------------------------------------------------------------------------------------------------------------------------------------------------------------------------------|------------|
| <p>Have you included the information requested as detailed in our <a href="#">Minimum Standards Reporting Checklist</a>?</p>                                                                                                                                                                                                                                                                                                                                                                                                                            |            |
| <p><b>Availability of data and materials</b></p> <p>All datasets and code on which the conclusions of the paper rely must be either included in your submission or deposited in <a href="#">publicly available repositories</a> (where available and ethically appropriate), referencing such data using a unique identifier in the references and in the “Availability of Data and Materials” section of your manuscript.</p> <p>Have you have met the above requirement as detailed in our <a href="#">Minimum Standards Reporting Checklist</a>?</p> | <p>Yes</p> |

# High-quality genome assemblies from key Hawaiian coral species

Timothy G. Stephens ([ts942@sebs.rutgers.edu](mailto:ts942@sebs.rutgers.edu))<sup>1,\*</sup>, JunMo Lee ([leejunmo331@gmail.com](mailto:leejunmo331@gmail.com))<sup>2</sup>, YuJin Jeong ([lpple0826@knu.ac.kr](mailto:lpple0826@knu.ac.kr))<sup>2</sup>, Hwan Su Yoon ([hsyoon2011@skku.edu](mailto:hsyoon2011@skku.edu))<sup>3</sup>, Hollie M. Putnam ([hputnam@uri.edu](mailto:hputnam@uri.edu))<sup>4</sup>, Eva Majerová ([majerova@hawaii.edu](mailto:majerova@hawaii.edu))<sup>5</sup>, and Debashish Bhattacharya ([dbhattac@rutgers.edu](mailto:dbhattac@rutgers.edu))<sup>1</sup>

<sup>1</sup>Department of Biochemistry and Microbiology, Rutgers University, New Brunswick, NJ 08901, USA.

<sup>2</sup>Department of Oceanography, Kyungpook National University, Daegu, Buk-gu 41566, Korea.

<sup>3</sup>Department of Biological Sciences, Sungkyunkwan University, Suwon 16419, Korea.

<sup>4</sup>Department of Biological Sciences, University of Rhode Island; Kingston, RI 02881, USA.

<sup>5</sup>Hawai'i Institute of Marine Biology, PO Box 1346 Kāne'ohe HI 96744, USA.

\*Corresponding author ([ts942@sebs.rutgers.edu](mailto:ts942@sebs.rutgers.edu))

1 **Abstract**

2

3 **Background**

4 Coral reefs house about 25% of marine biodiversity and are critical for the livelihood of many  
5 communities by providing food, tourism revenue, and protection from wave surge. These  
6 magnificent ecosystems are under existential threat from anthropogenic climate change. Whereas  
7 extensive ecological and physiological studies have addressed coral response to environmental  
8 stress, high-quality reference genome data are lacking for many of these species. The latter issue  
9 hinders efforts to understand the genomic and genetic basis of stress resistance and to design  
10 informed coral conservation strategies.

11 **Results**

12 We report genome assemblies from four key Hawaiian coral species, *Montipora capitata*,  
13 *Pocillopora acuta*, *Pocillopora meandrina*, and *Porites compressa*. These species, or members  
14 of these genera, are distributed worldwide and therefore of broad scientific and ecological  
15 importance. For *M. capitata*, an initial assembly was generated from short-read Illumina and  
16 long-read PacBio data, which was then scaffolded into 14 putative chromosomes using Omni-C  
17 sequencing. For *Poc. acuta*, *Poc. meandrina*, and *Por. compressa*, high-quality assemblies were  
18 generated using short-read Illumina and long-read PacBio data. The *Poc. acuta* assembly is from  
19 a triploid individual, making it the first reference genome of a non-diploid coral animal.

20 **Conclusions**

21 These assemblies are significant improvements over available data and provide invaluable  
22 resources for supporting multi-omics studies into coral biology, not just in Hawai‘i, but also in  
23 other regions, where related species exist. The *Poc. acuta* assembly gives us, for the first time, a  
24 platform for studying polyploidy in corals, and its role in genome evolution and stress adaptation  
25 in these organisms.

26

27 **Keywords**

28 Coral; Scleractinia; *Montipora capitata*; *Pocillopora acuta*; *Pocillopora meandrina*; *Porites*  
29 *compressa*; chromosome-level genome assembly; ploidy; triploid

30

31

## 32 **Background**

33 *Montipora capitata*, *Pocillopora acuta*, *Pocillopora meandrina*, and *Porites compressa* are  
34 species of scleractinian corals that are widespread in the Hawaiian Islands, with *M. capitata* and  
35 *Por. compressa* being dominant reef builders. These species are members of cosmopolitan  
36 genera, with closely related taxa inhabiting reefs across the Great Barrier Reef and the Coral  
37 Triangle [1-3], as well as other regions, such as *Pocillopora* in Panama [4]. In recent years, due  
38 to their critical importance to Hawaiian reef ecosystems, the ease of accessibility of these species  
39 to researchers working in the United States, and the growing threat that anthropogenic climate  
40 change poses to global reef ecosystem, these four species have become the subject of many stress  
41 (including thermal [5-7] and acidification [8, 9]), microbiome [10, 11], and population genomic  
42 [12-15] studies (among many others). Given the significant interest in these species as models  
43 for coral biology, there is a pressing need to generate high-quality reference data to provide a  
44 solid foundation for future research.

45  
46 A genome assembly for *M. capitata* was published in 2019 by our group [16] using Pacific  
47 Biosciences (PacBio) RSII data. This assembly was significantly larger (886 Mbp) than any of  
48 the other coral genomes available at that time (ca. 300-500 Mbp), and is larger than any  
49 *Montipora* species genome [17, 18] that has since been published. The published assembly  
50 contains a high number (>18% [19]) of duplicated BUSCO genes, suggesting the presence of  
51 haplotigs (i.e., sequences derived from different homologous chromosomes) that were not  
52 removed during the assembly process. There are currently published genomes for three  
53 *Pocillopora* [4, 20, 21] species, none of which are from Hawai‘i. One of these is a *Poc. acuta*  
54 isolate collected from Lombok, Indonesia [22] that was generated using Illumina short-read data.  
55 This genome assembly is highly fragmented, consisting of 168,465 scaffolds, and whereas it  
56 does have a scaffold N50 of 147 Kbp, the contig N50 is only 9,649 bp. The completeness of the  
57 genes predicted in this genome is not high, with only 56% of the core eukaryotic genes [20]  
58 identified in the reported “*ab initio*” predicted gene set. A second set of predicted genes inferred  
59 using RNA-seq evidence (termed the “experimental” set) contains 93% of core eukaryotic genes,  
60 however, this set does not have predicted open reading frames (i.e., it includes both coding and  
61 non-coding genes), making it difficult to make a direct comparison with other published

62 genomes. There are currently three *Porites* species with published genomes [23-25], while they  
63 are all of high completeness and reasonable contiguity, none are from Hawai‘i.

64

65 As the cost of genome sequencing, in particular, long-read methods continues to decrease,  
66 opportunities arise to generate genome data from understudied species or species that have  
67 genomes of lower quality that would benefit from the improvement gained from the newer  
68 technologies. Furthermore, technologies such as Dovetail Omni-C, which provides long range  
69 linkage information, enables the generation of genome assemblies that are at (or near)  
70 chromosomal-level resolution. In this study, we generated an improved reference genome  
71 assembly for our previously published Hawaiian *M. capitata* using long-read PacBio, short-read  
72 Illumina, and newly generated Omni-C data, that is of chromosome-level resolution. The 14  
73 largest scaffolds resulting from this assembly likely represent the 14 chromosomes predicted in  
74 *Montipora* species [26]. We also generated, using PacBio HiFi data (i.e., circular consensus  
75 corrected PacBio reads), high-quality genome assemblies for two *Pocillopora* and one *Porites*  
76 species. The sequenced *Poc. acuta* isolate is a triploid, making it the first non-diploid coral  
77 genome to be published.

78

## 79 **Data description**

### 80 **Sample collection and processing**

81 The four coral species targeted in this study were collected from Kāne‘ohe Bay, Hawai‘i. For *M.*  
82 *capitata*, the initial PacBio and Illumina-based assembly was generated using sperm DNA (see  
83 [16]). Input DNA for the Dovetail Genomics approach (<https://dovetailgenomics.com>), using the  
84 Omni-C assay and workflow, was a bleached nubbin (a ~5 x 5cm fragment) from a colony that  
85 was greatly reduced in algal symbionts (GPS coords: 21.474465, -157.834468; SRA BioSample:  
86 SAMN21845729). This fragment was collected under Hawai‘i Department of Aquatic Resources  
87 Special Activity Permit 2019-60, snap frozen in liquid nitrogen, and stored at -80°C before it was  
88 shipped on dry ice to Dovetail Genomics (<https://dovetailgenomics.com>) for processing using  
89 their Omni-C assay and workflow.

90

91 For *Poc. meandrina*, one nubbin (a ~5 x 5cm fragment) was collected from an adult colony from  
92 Reef 13 (GPS coords: 21.450803, -157.794692) on 2020-09-05 (SRA BioSample:

93 SAMN21845732, SAMN21845733, and SAMN21845734) under DAR-2021-33, Amendment  
94 No. 1 to HIMB. High molecular weight DNA was extracted using the QIAGEN Genomic-tip  
95 100/G (Cat #: 10223), the QIAGEN Genomic DNA Buffer Set (Cat #: 19060), QIAGEN RNase  
96 A (100mg/mL concentration: Cat #: 19101), QIAGEN Proteinase K (Cat #: 19131), and DNA lo-  
97 bind tubes (Eppendorf Cat #: 022431021). In brief, a clipping of the coral fragment was placed in  
98 a cleaned and sterilized mortar and pestle and ground to powder on liquid nitrogen. High  
99 molecular weight DNA was then extracted according to the manufacturer's instructions for  
100 preparation of tissue samples in the QIAGEN Genomic DNA Handbook (version 06/2015).  
101 For *Poc. acuta*, one nubbin was collected from an adult colony from a reef next to the Hawai'i  
102 Institute of Marine Biology (GPS coords: 21.436056, -157.786861) on 2018-09-05 (SRA  
103 BioSample: SAMN22898959) under Special Activity Permit 2019-60. High molecular weight  
104 DNA was extracted using the QIAGEN Genomic-tip 100/G approach outlined for *Poc.*  
105 *meandrina* above. High molecular weight DNA from *Poc. meandrina* and *Poc. acuta* was sent to  
106 DNA Link Sequencing Lab (<https://www.dnalinkseqlab.com>) for sequencing on their PacBio  
107 Sequel 2 and Illumina NovaSeq 6000 platforms.

108

109 For *Por. compressa*, DNA was extracted from sperm released at 11 pm on 09 June 2017 from a  
110 single colony in Kāne'ōhe Bay, O'ahu. Total genomic DNA was extracted using the CTAB  
111 protocol and the DNeasy Blood and Tissue Kit (Qiagen, Germany) with subsequent clean-up  
112 steps. Genomic data were generated using the PacBio RSII platform. To increase the sequence  
113 quality of the assembly, a polishing step was done using the Arrow consensus caller. To this end,  
114 we generated a total of 20 Gbp of high-throughput sequencing data (Illumina HiSeq2000; 100 bp  
115 paired-end library) as follows. The whole-genome sequencing library of *Por. compressa* was  
116 prepared using the Truseq Nano DNA Prep Kit (550bp) protocol following the manufacturer's  
117 instructions. Randomly sheared genomic DNA was ligated with index adapters and purified. The  
118 ligated products were size-selected for 300-400 bp and amplified using the adapter-specific  
119 primers. Library quality was checked using a 2100 BioAnalyzer (Agilent Technologies, Santa  
120 Clara, CA, USA).

121

122 **RNA Extractions**



123 RNA was extracted by clipping a small piece of coral using clippers sterilized in 10% bleach,  
124 deionized water, isopropanol, and RNase free water, and then placed in 2 mL Fisherbrand™  
125 Pre-Filled Bead Mill microcentrifuge tube containing 0.5mm glass beads (Fisher Scientific  
126 Catalog. No 15-340-152) with 1000 µL of Zymo DNA/RNA shield. A two-step extraction  
127 protocol was used to extract RNA and DNA, with the first step as a “soft” homogenization to  
128 reduce shearing of RNA or DNA. Tubes were vortexed at high speed for 1 and 2 minutes for  
129 *Poc. acuta* and *M. capitata* fragments, respectively. The supernatant was removed and  
130 designated as the “soft extraction”. Second, an additional 500 µL of Zymo DNA/RNA shield was  
131 added to the bead tubes and placed in a Qiagen TissueLyser for 1 minute at 20 Hz. The  
132 supernatant was removed and designated as the “hard extraction”. Subsequently, 300 µL of  
133 sample from both soft and hard homogenate was extracted with the Zymo Quick-DNA/RNA  
134 Miniprep Plus Kit (Zymo Cat D7003) Protocol with the following modifications. RNA quantity  
135 (ng\_µL) was measured with a ThermoFisher Qubit Fluorometer, DNA quality was assessed  
136 using gel electrophoresis, and RNA quality was measured with an Agilent TapeStation System.

137

### 138 **Haploid genome assembly of Hawaiian coral species**

139 The long-read genome sequencing data (PacBio) of the Hawaiian coral species were initially  
140 assembled using CANU (v2.2; default options) [27]. The PacBio reads for *M. capitata* (78.3  
141 Gbp; SRR17163565) and *Por. compressa* (63.3 Gbp; SRR12695159 – SRR12695166) were  
142 generated using the PacBio RSII platform (‘-pacbio’ option for CANU assembler). The PacBio  
143 reads for *Poc. meandrina* (311.8 Gbp; SRR16077713), and *Poc. acuta* (239.1 Gbp;  
144 SRR16077715) were generated using PacBio HiFi platform (‘-pacbio-hifi’ option for CANU  
145 assembler). An error correction step (nucleotide correction of assembly) using the initial  
146 assemblies of *M. capitata* (1.2 Gbp; Supplementary Table S1), *Por. compressa* (1.0 Gbp), *Poc.*  
147 *meandrina* (0.7 Gbp), and *Poc. acuta* (1.1 Gbp) was done using bowtie2 (v2.4.2; default options)  
148 [31] and the Pilon program (v1.23; default options) [28] with the Illumina short-read sequencing  
149 data (HiSeq2500: 27.4 Gbp of *M. capitata* [SRR8497577]; HiSeq 2000: 20.9 Gbp of *Por.*  
150 *compressa* [SRR12695158]; NovaSeq 6000: 27.2 Gbp of *Poc. meandrina* [SRR16077712], and  
151 23.0 Gbp of *Poc. acuta* [SRR16077714]). Before using the Illumina data, quality trimming and  
152 adapter clipping of the raw reads were done using Trimmomatic (v0.39; default options) [29]. To  
153 remove potential contaminant sequences, assembly results were analyzed using BLASTn (*e-*

154 value cutoff =  $1.e^{-10}$  cutoff) analysis with the nr database (downloaded: Feb. 2019). To estimate  
155 genome size and ploidy of the Hawaiian coral species, *k*-mer analysis was done using Jellyfish  
156 (21-mer) [30] with the Illumina short-read data.

157 To reconstruct haploid genomes using the initial assemblies of the Hawaiian coral  
158 species, we used the following protocol. First, we predicted repetitive DNA sequences in the  
159 initial assemblies and constructed soft-masked assemblies. Repetitive DNA elements were  
160 identified using the RepeatModeler pipeline (v2.0.1;  
161 <http://www.repeatmasker.org/RepeatModeler/>) [31-33] which includes RECON (v1.08) and  
162 RepeatScout (v1.0.6) as *de novo* repeat finding programs. We used the default options for l-mer  
163 size and removed low-complexity and tandem repeats. To classify repeat content, the libraries  
164 were constructed from giri repbase (<http://www.girinst.org>). The consensus sequences of repeat  
165 families were used to analyze corresponding repeat regions with RepeatMasker (v4.1.1; default  
166 options with soft-masked; <http://www.repeatmasker.org/>). The second step in the protocol was to  
167 infer assemblies as haploid genomes using the HaploMerger2 (HM2) program (the latest release,  
168 20180603) [34] and the soft-masked assemblies. The third step was validation of duplicated  
169 eukaryotic core genes in the haploid genome assemblies using the Benchmarking Universal  
170 Single-Copy Orthologs (BUSCO) program (v4.1.4; genome-based analysis with  
171 eukaryota\_odb10 dataset) [35]. The final step was to repeat the HM2 analysis until the number of  
172 duplicated eukaryotic core genes decreased to under 1%, or the value could not be decreased any  
173 further in the haploid assemblies (Supplementary Table S1). The purged assembly of *M. capitata*  
174 was sent to Dovetail Genomics along with an additional coral fragment (see above) that was used  
175 for high molecular weight DNA extraction for analysis using their Omni-C assay and HiRise  
176 v2.2.0 assembly workflow. A total of 56.5 million read-pairs of Dovetail Genomics Omni-C  
177 sequencing data (SRR16077716) were generated and used for scaffolding. This step produced a  
178 final genome assembly that was at putative chromosome level resolution for *M. capitata*.

179

## 180 **Gene prediction and functional annotation**

181 Quality trimming and adapter removal of the RNA sequencing (RNA-seq) data in the Hawaiian  
182 coral species (*M. capitata* [77.5 Gbp; SRR14729868 – SRR14729873, SRR14729878,  
183 SRR14729881, SRR14729889, SRR14729890, SRR14729893, and SRR14729894], *Por.*  
184 *compressa* [76.5 Gbp; SRR14729874 – SRR14729877, SRR14729879 – SRR14729880,

185 SRR14729882 – SRR14729888, SRR14729891, and SRR14729892], *Poc. acuta* [656.7 Gbp;  
186 SRR14610884 – SRR14610890, SRR14610892 – SRR14610901, SRR14610903 –  
187 SRR14610912, SRR14610914 – SRR14610923, SRR14610925 – SRR14610932,  
188 SRR14610975, SRR14610977 – SRR14610986, SRR14610988 – SRR14610997, SRR14610999  
189 – SRR14611008, SRR14611010 – SRR14611019, SRR14611021 – SRR14611030,  
190 SRR14611033 – SRR14611042, SRR14611044 – SRR14611053, and SRR14611055 –  
191 SRR14611057], and *Poc. meandrina* [10.6 Gbp; SRR16077711]) were done using Trimmomatic  
192 (v0.39; default options) [29]. These data were assembled using Trinity v2.11 with the default  
193 option of *de novo* transcriptome assembly [36, 37]. The trimmed RNA-seq raw reads, and the  
194 assembled transcriptomes were aligned to the haploid genome assemblies using the STAR  
195 aligner (v2.6.0c; default options for the raw reads), and the STARlong aligner (v2.6.0c; --  
196 runMode alignReads --alignIntronMin 10 --seedPerReadNmax 100000 --seedPerWindowNmax  
197 1000 --alignTranscriptsPerReadNmax 100000 --alignTranscriptsPerWindowNmax 10000),  
198 respectively [38]. Based on each alignment (i.e., bam file), gene predictions were done using the  
199 BRAKER2 pipeline (v2.1.5; <http://bioinf.uni-greifswald.de/bioinf/braker>) [39], which includes  
200 GeneMark-ET [40] and AUGUSTUS [41] with default (automatically optimized) options. From  
201 the two types (i.e., RNA-seq, and assembled transcriptome) of gene models from the Hawaiian  
202 coral species, the best (longest) gene models were manually selected based on results of  
203 BLASTp search ( $e$ -value cutoff =  $1.e^{-5}$  cutoff). Functional annotation of gene models was done  
204 using the NCBI Conserved Domain Search (CD-Search) [42], the eggNOG-mapper [43], and the  
205 KEGG Automatic Annotation Server (KAAS) [44].

206

### 207 **Genomes of corals used for comparative analysis**

208 The genome assemblies and predicted genes from the four *Montipora* (*M. cactus* [17], *M.*  
209 *capitata* from the Hawaiian Waiopae tide pools [18], *M. efflorescens* [17], and the previous  
210 version of the Hawaiian *M. capitata* isolate [16] that we assembled in this study), three  
211 *Pocillopora* (*Poc. damicornis* [4], *Poc. acuta* [from Indonesia] [22], and *Poc. verrucosa* [21]),  
212 and four *Porites* (*Por. astreoides* [25], *Por. australiensis* [24], *Por. lutea* [23], and *Por. rus* [45])  
213 species that have been sequenced were retrieved from their respective repositories  
214 (Supplementary Table S2) and used for comparative analysis with the assemblies generated in  
215 this study. The *M. cactus* and *M. efflorescens* genome assemblies (from

216 <https://marinegenomics.oist.jp> [17]) were filtered, retaining only scaffolds identified by Yuki, Go  
217 [19] as not being haplotigs. The updated gene models from Yuki, Go [19] were used in place of  
218 those available with the original assemblies. For species where just the gene models were  
219 provided (in gff format), gffread v0.11.6 (-S -x cdsfile -y pepfile) [46] was used to infer the  
220 protein and CDS sequences. Open Reading Frames (ORFs) were predicted in the RNA-Seq  
221 based “experimental” genes predicted in the Indonesian *Poc. acuta* isolate [22], using  
222 TransDecoder v5.5.0 (<https://github.com/TransDecoder/TransDecoder>); HMMER v3.1b2 was  
223 used to search the candidate ORFs against the Pfam database (release 33.1; i-Evalue < 0.001)  
224 and BLASTP (v2.10.1; -max\_target\_seqs 1 -evalue 1e-5) was used to search candidate ORFs  
225 against the SwissProt database (release 2020\_05), with the resulting homology information used  
226 by TransDecoder to guide ORF prediction. Only the longest transcript per gene had ORFs  
227 predicted and single-exon genes without strand information were assumed to be from the  
228 forward/positive strand (TransDecoder will change the strand of single exon genes if required,  
229 based on the results of ORF prediction).

230

### 231 **Genome size estimation**

232 The genome size and ploidy of the new (this study) and published *Montipora*, *Pocillopora*, and  
233 *Porites* species (except the Indonesian *Poc. acuta* which does not have read data available to  
234 download, *Por. rus* which only had reads from the holobiont [i.e., reads from the coral, algal  
235 symbiont, and associated bacteria] available, and *Por. astreoides* which only had PacBio long  
236 reads available) were estimated using the GenomeScope2 and Smudgeplot tools [47]. For each  
237 species, the available short-reads genome sequencing data were retrieved from NCBI SRA  
238 (Supplementary Table S2), trimmed using cutadapt v3.5 [48] (-q 20 --minimum-length 25 -a  
239 AGATCGGAAGAGCACACGTCTGAACTCCAGTCA -A  
240 AGATCGGAAGAGCGTCGTGTAGGGAAAGAGTGT), and decomposed into *k*-mers using  
241 Jellyfish [30] (v2.3.0; k=21). The *k*-mer frequency histogram produced by Jellyfish (using the  
242 ‘jellyfish histo’ command) was imported into GenomeScope2 with a theoretical diploid model  
243 fitted with the data (Fig. 1C, D, and F and Supplementary Fig. S1); a theoretical triploid model  
244 was fitted with the Hawaiian *Poc. acuta* data (Fig. 1E and Supplementary Fig. S1F) because it  
245 was found to be a triploid after initial analysis using Smudgeplot and GenomeScope2.  
246 Smudgeplot was run using the *k*-mers extracted by Jellyfish (following the workflow from

247 <https://github.com/KamilSJaron/smudgeplot/wiki/manual-of-smudgeplot-with-jellyfish>), with  
248 thresholds for the lower  $k$ -mer coverage cutoff (just after the minimum between the initial error  
249 peak and the first major peak) and upper  $k$ -mer coverage cutoff (8.5 times the coverage of the  
250 first major coverage peak) chosen for each species using the GenomeScope2 profile shown in  
251 Supplementary Figure S1. The “smudge plots” shown in Supplementary Figure S1 were  
252 generated using the haploid coverage values estimated by GenomeScope2. The cutoffs used  
253 when running Smudgeplot for each species are shown in Supplementary Table S2.

254

### 255 **Conformation of sample ploidy**

256 The program nQuire [49] (retrieved 7/7/2021 from <https://github.com/clwgg/nQuire>), which uses  
257 the frequency distribution of bi-allelic variant sites inferred from aligned reads to model the  
258 ploidy of a sample, was used to verify the ploidy of the four genomes sequenced in this study.  
259 Briefly, bowtie2 v2.4.4 (‘--very-sensitive --no-unal’) was used to align the trimmed (by cutadapt;  
260 described previously) Illumina short-reads against their respective genome assemblies; aligned  
261 reads were coordinate sorted using samtools v1.11 [50]. The aligned and sorted BAM files were  
262 converted into “BIN” files using nQuire (‘nQuire create -q 20 -c 20 -x’), filtering for reads with a  
263 minimum mapping quality of 20 and sites with a minimum coverage of 20. Denoised BIN files  
264 were created using the “nQuire denoise” command run on the initial BIN files. The delta Log-  
265 Likelihood values for each ploidy model (diploid, triploid, and tetraploid) was calculated by the  
266 “nQuire lrdmodel” command for each of the initial and denoised BIN files. The lower the delta  
267 Log-Likelihood value of a given model the better fit it is for the frequency distribution of the bi-  
268 allelic variant sites extracted from the aligned reads; the ploidy of the sample is there for  
269 assumed to be the ploidy model with the lowest delta Log-Likelihood value. The nQuire results  
270 are shown in Supplementary Table S4.

271

### 272 **Assessment of completeness using BUSCO**

273 The “completeness” of the genome assemblies and predicted genes (published in this study and  
274 from previous studies; Supplementary Table S3) were assessed using BUSCO v5.0.0 (‘--mode  
275 genome’ and ‘--mode protein’, respectively) with the eukaryota\_odb10 (release 2020-09-10) and  
276 metazoa\_odb10 datasets (release 2021-02-24) [51].

277

## 278 **Analysis of extra-chromosomal scaffolds**

279 The proteins predicted on the extra-chromosomal scaffolds (i.e., the scaffolds that do not  
280 comprise the 14 putative chromosomes) in the *M. capitata* assembly were compared against the  
281 proteins from the chromosomal scaffolds using BLASTP v1.10.1 [52]; the resulting hits were  
282 filtered using an *e*-value cutoff  $< 1 \times 10^{-5}$ . Additional filtering steps were applied to produce two  
283 sets of hits: for the first (lenient) set, hits were retained if they had a query coverage of  $> 75\%$   
284 and an identity  $> 75\%$ , with the single best (*e*-value-based) top hit kept for each query sequence;  
285 for the second (stringent) set, hits were retained if they had a query coverage of  $> 95\%$  and an  
286 identity  $> 95\%$ , with the single best (*e*-value-based) top hit kept for each query sequence. The  
287 lenient filtered top hits were used to determine if the extra-chromosomal scaffolds tend to encode  
288 genes that have similarity to a single, or multiple, chromosomes. For this analysis, only proteins  
289 with top hits to the chromosomal scaffolds (i.e., proteins with hits that have an *e*-value  $< 1 \times 10^{-5}$ ,  
290 query coverage  $> 75\%$ , and an identity  $> 75\%$ ) were considered, and only scaffolds with multiple  
291 proteins with top hits were considered.

292

## 293 **Data Validation and Quality Control**

### 294 ***Montipora capitata* genome assemblies**

295 The *M. capitata* assembly generated in the study (assembly version V3.0; hereinafter the “new”  
296 Hawaiian *M. capitata* genome assembly) has fewer assembled bases (781 Mbp vs. 886 Mbp) and  
297 scaffolds (1,699 vs. 3,043), and a vastly improved N50 (47.7 Mbp vs. 0.54 Mbp; Supplementary  
298 Table S3), compared to the assembly of the same Hawaiian *M. capitata* isolate (hereinafter the  
299 “old” Hawaiian *M. capitata* genome assembly) that was previously published by our group [16].  
300 The 14 largest scaffolds in the new assembly, ranging in size from ~22 to ~69 Mbp, likely  
301 represent the 14 chromosomes predicted in other *Montipora* species (Figs. 1A and B) [26]. These  
302 putative chromosomes total 680 Mbp of assembled sequence, which is only slightly larger than  
303 the estimated genome size of 644 Mbp (Fig. 1C; estimated by GenomeScope2 [47] using *k*-mers  
304 of size 21 bp). The estimated genome size of the other published *Montipora* species is ~700  
305 Mbp, whereas the estimated genome size of the new Hawaiian *M. capitata* genome is 644 Mbp  
306 (although the assembly is a little larger; see discussion below). This suggests that species in the  
307 genus *Montipora* have genomes that are marginally smaller than 700 Mbp in size.

308 The *M. capitata* isolate that was sequenced appears to be a diploid, with a good fit  
309 between its *k*-mer frequency histogram and the theoretical diploid model implemented in  
310 GenomeScope2 (black line in Fig. 1C and Supplementary Fig. S1A), and a clear “smudge”  
311 (bright yellow region in Supplementary Fig. S1A) of *k*-mer pairs with a coverage of 2n and a  
312 normalized coverage of 1/2; all of which suggests that the sample is diploid. nQuire also  
313 predicted that the *M. capitata* sample was a diploid (i.e., the diploid model had the lowest delta  
314 Log-Likelihood value; Supplementary Table S4), supporting the results of GenomeScope2 and  
315 Smudgeplot.

316 Compared with the old assembly, the new *M. capitata* assembly has a slightly higher  
317 BUSCO completeness for both the Metazoa (from 95.2% to 95.7%, respectively) and Eukaryota  
318 (from 97.7% to 99.2%, respectively) datasets (Supplementary Table S3) but a significantly  
319 reduced number of duplicated BUSCO genes for both the Metazoa (from 21.2% to 1.6%,  
320 respectively) and Eukaryota (from 22.0% to 1.2%, respectively) datasets. The high number of  
321 duplicated BUSCO genes in the old assembly is likely a result of haplotigs that evaded removal  
322 during the assembly process; this problem appears to have been resolved in the new assembly.  
323 Compared with the other published *Montipora* genomes, the new *M. capitata* assembly is the  
324 most contiguous and complete to date, with a significantly higher N50 (47.7 Mbp compared to  
325 the next best of 1.2 Mbp in *M. efflorescens*) and BUSCO completeness (e.g., 99.2% Eukaryota  
326 dataset completeness compared to the next best of 92.1% in *M. cactus*). As the same PacBio and  
327 Illumina libraries were used to construct the new and old assemblies, the significant  
328 improvement observed in the new assembly is attributed to the use of a different hybrid assembly  
329 approach, combined with the Dovetail Omni-C library preparation and scaffolding with the  
330 HiRise (v2.2.0) software.

331

### 332 ***Pocillopora* genome assemblies**

333 The *Poc. acuta* genome assembly generated in this study (hereinafter the “Hawaiian *Poc. acuta*”)   
334 is larger (408 Mbp) than *Poc. acuta* from Indonesia (352 Mbp) [22] (Supplementary Table S3)   
335 and then its estimated genome size of 353 Mbp (Fig. 1E). The size of the *Poc. meandrina*   
336 genome assembly generated in this study (377 Mbp) is comparable to the published Indonesian   
337 *Poc. acuta* (352 Mbp) [22] and *Poc. verrucosa* (381 Mbp) [21] species, but is larger than *Poc.*   
338 *damicornis* (234 Mbp) [4] (Supplementary Table S3). Although the latter is likely under-

339 assembled given its smaller size relative to the estimated genome size for that species. Moreover,  
340 the estimated genome sizes for these species appears to be around 330-350 Mbp, with the  
341 assemblies being 350-380 Mbp in size (excluding the Hawaiian *Poc. acuta* [further discussion  
342 below]). This suggests that species in the genus *Pocillopora* have genomes that are ~350 Mbp in  
343 size.

344 The Hawaiian *Poc. acuta* isolate that was sequenced is a triploid; the presence of three  
345 major peaks in the *k*-mer frequency histogram (at ~17x, ~35, and ~51x) which fit the triploid  
346 model implemented by GenomeScope2 (black line Fig. 1E and Supplementary Fig. S1F), and the  
347 clear “smudge” (bright yellow region in Supplementary Fig. S1F) of *k*-mer pairs with a coverage  
348 of ~3n and a normalized coverage of 1/3, all suggests that the sample is triploid. nQuire also  
349 predicts that the *Poc. acuta* is a triploid (Supplementary Table S4), supporting the results of  
350 GenomeScope2 and Smudgeplot. For *Poc. meandrina*, GenomeScope2 (Fig. 1D), Smudgeplot  
351 (Supplementary Fig. S1E), and nQuire (Supplementary Table S4) all predict that the isolate that  
352 was sequenced is a diploid.

353 The BUSCO completeness of the Hawaiian *Poc. acuta* genome is improved for both the  
354 Metazoa (96.1%), and Eukaryota (98.5%) datasets (Supplementary Table S3) compared to the  
355 Indonesian *Poc. acuta* assembly (89.4% and 91.4%, respectively) and the other *Pocillopora*  
356 assemblies (~91-95% and 91-98%, respectively). However, the Hawaiian assembly does have a  
357 slightly higher proportion of duplicated BUSCO genes (2.5% and 2.0% in the Metazoa and  
358 Eukaryota datasets) compared with some (the Indonesian *Poc. acuta* and *Poc. damicornis*  
359 genomes which have <1% in both datasets) but not all (the *Poc. verrucosa* genome which has  
360 2.9% and 5.5%, respectively) of the published genomes. This is likely a result of the Hawaiian  
361 *Poc. acuta* being a triploid; haplotig removal programs (i.e., HaploMerger2 [34]) are generally  
362 designed for use with diploid species, so it is unsurprising that they were unable to fully  
363 resolving the assembly given the added complexity associated with resolving assemblies of  
364 higher ploidy genomes. Regardless, the Hawaiian *Poc. acuta* assembly is more contiguous (i.e.,  
365 higher N50 and fewer scaffolds) than the other *Pocillopora* genomes and is the first assembly  
366 generated from a non-diploid coral. The *Poc. meandrina* genome has a BUSCO completeness  
367 (96.1% for the Metazoa and 98.8% for the Eukaryota datasets) that is just as high as the  
368 Hawaiian *Poc. acuta* genome, but with fewer duplicated BUSCO genes (1.2% and 0.4%,  
369 respectively), suggesting that this assembly has minimal retained haplotigs.



370

371 ***Porites compressa* genome assembly**

372 The size of the *Por. compressa* genome assembly generated in this study (593 Mbp) is similar to  
373 the published *Por. australiensis* (576 Mbp) [24] and *Por. lutea* (552 Mbp) [23] genomes, and a  
374 little smaller than *Por. astreoides* (677 Mbp). The estimated genome sizes for these species  
375 appears to be around 525-550 Mbp (excluding *Por. astreoides*, *Por. lutea* and *Por. rus*), with the  
376 assemblies coming in at around 550-600 Mbp. The high number of duplicated BUSCO genes in  
377 the *Por. astreoides* assembly (11.5% and 14.9% for the Metazoa and Eukaryota datasets,  
378 respectively) suggests that its larger assembly size (compared with the other *Porites* species) is  
379 likely explained by retained haplotigs. The genome assembly (470 Mbp) and estimated genome  
380 size (405 Mbp) of *Por. rus* is smaller than the other *Porites* isolates however, these data were  
381 generated from holobiont samples (*i.e.*, samples with both coral, algal symbiont, and associated  
382 bacteria DNA present) using a metagenomic binning strategy. The difference in this approach  
383 compared with how the other *Porites* genomes were processed likely explain the difference  
384 between the sizes. *Por. lutea* has an estimated genome size of 694 Mbp, which is significantly  
385 larger than the other *Porites* species and its assembled genome. Whereas this suggests that the  
386 *Por. lutea* genome is under-assembled (comprising only ~80% of the estimated genome) its  
387 relatively high completeness (95.3% and 98.5% for the Metazoa and Eukaryota datasets,  
388 respectively) suggests that the genome size has been overestimated, possibly driven by  
389 sequencing error or other factors associated with sample preparation or collection from the field.  
390 These results indicate that species in the genus *Porites* have genomes that are just under 600  
391 Mbp in size. For *Por. compressa*, GenomeScope2 (Fig. 1F), Smudgeplot (Supplementary Fig.  
392 S1I), and nQuire (Supplementary Table S4) all predict that the isolate sequenced is a diploid.

393 The BUSCO completeness of the *Por. compressa* assembly is slightly higher (95.5% for  
394 the Metazoa and 99.2% for the Eukaryota datasets; Supplementary Table S3) compared to the  
395 *Por. astreoides* (93.2% and 98.0%, respectively), *Por. australiensis* (91.6% and 94.9%,  
396 respectively), *Por. lutea* (95.3% and 98.5%, respectively), and *Por. rus* (69.6% and 67.1%,  
397 respectively) assemblies, but has a much higher N50 (4 Mbp) compared to the published species  
398 (0.41, 0.55, 0.66, and 0.14 Mbp, respectively) and fewer scaffolds (608 vs. 3,051, 4,983, 2,975,  
399 and 14,982, respectively). The published genome assemblies also have many more gaps (~0-29%  
400 of assembled bases are 'N' characters) compared to *Por. compressa* (0%), demonstrating that the

401 new assembly is of equally high completeness compared to the published species, but with a  
402 much higher contiguity.

403

#### 404 **Predicted protein-coding genes**

405 For *M. capitata*, 54,384 protein-coding genes were predicted in the new assembly compared with  
406 the 63,227 predicted in the old version (Supplementary Table S3). The reduction in the number  
407 of predicted genes in the new *M. capitata* assembly, compared with the published version, is  
408 likely driven by its reduced assembly size, with many of the missing genes likely arising from  
409 haplotigs retained in the old assembly, that were removed in the new version. The BUSCO  
410 completeness of the predicted genes is improved in the new assembly (95.2% of the Metazoa and  
411 96.5% for the Eukaryota BUSCO datasets) compared with the old assembly (94.0% and 93.3%,  
412 respectively), and the number of duplicated BUSCO genes is reduced in the new assembly (2.3%  
413 and 1.2%, respectively) compared to the published (18.2% and 18.8%, respectively). The  
414 predicted gene set from the new Hawaiian *M. capitata* assembly also has > 4.2% and > 3.5%  
415 more complete BUSCO genes (from the Metazoa and Eukaryota datasets, respectively)  
416 recovered compared to the other published isolates, demonstrating that the gene models  
417 predicted in the new assembly are also highly complete. Whereas increase in the number of  
418 genes predicted in the new Hawaiian *M. capitata* genome, compared with the published species,  
419 could be attributed to differences in the workflows used to predicted the genes in these species  
420 [53] however, it is also likely driven by the higher completeness and contiguity of the new  
421 genome assembly.

422         There are 33,730 predicted protein-coding genes in the Hawaiian *Poc. acuta* and 31,840  
423 in the *Poc. meandrina* genome assemblies (Supplementary Table S3), which is ~4,000–8,000  
424 more than predicted in the other *Pocillopora* species. The number of complete BUSCO genes  
425 from the Metazoa and Eukaryota BUSCO datasets is > 6% higher in the new Hawaiian *Poc.*  
426 *acuta* and *Poc. meandrina* species than in the other *Pocillopora* species; the Hawaiian *Poc. acuta*  
427 also has 29.6% and 31.3% (respectively) more complete BUSCO genes recovered than the  
428 Indonesian *Poc. acuta*. The number of duplicated BUSCO genes is > 0.7% and > 2.3%  
429 (respectively) higher in the Hawaiian *Poc. acuta* gene set compared with the published  
430 *Pocillopora* species however, this was expected given the increased size of the genome  
431 assembly. The proportion of fragmented BUSCO genes is > 0.9% and > 2% lower (Metazoa and

432 Eukaryota BUSCO datasets, respectively) lower in the Hawaiian *Pocillopora* species compared  
433 with the published species. The average transcript length and the number of CDS per transcript  
434 of the Hawaiian *Pocillopora* genes (~1,350 bp and ~6.6, respectively) are congruent with the  
435 predicted genes of the published *Pocillopora* species (~1,100–1,900 bp and ~5.5–7.5,  
436 respectively). This suggests that the higher number of predicted genes in the Hawaiian  
437 *Pocillopora* species is not caused by the presence haplotigs in the genome assembly, although  
438 this likely contributes to the slight higher number of duplicated BUSCO genes in the Hawaiian  
439 *Poc. acuta*, or by the presence of fragmented genes models, since the number of fragmented  
440 BUSCO genes and the gene statistics suggest that the majority of genes are full length.  
441 Therefore, the higher number of predicted genes in this species can be (at least partially)  
442 attributed to the more complete and contiguous genome assemblies of the Hawaiian *Pocillopora*  
443 species relative to published species.

444       There are 44,130 predicted protein-coding genes in the Hawaiian *Por. compressa* genome  
445 assembly (Supplementary Table S3), which is > 8,000 more genes than predicted in the *Por.*  
446 *australiensis* (35,910) and *Por. lutea* (31,126) genomes, 4,677 more than in the *Por. rus* (39,453)  
447 genome, and 20,506 less than in the *Por. astreoides* (64,636) genome. The number of complete  
448 BUSCO genes from the Metazoa and Eukaryota BUSCO datasets is > 4% higher in *Por.*  
449 *compressa* than in the published *Porites* species. The number of duplicated BUSCO genes in  
450 *Por. compressa* is similar to *Por. lutea* and *Por. rus* but lower than in *Por. astreoides* and *Por.*  
451 *australiensis*, and the number of fragmented BUSCO genes in *Por. compressa* is much lower (>  
452 1.9% and > 5.1%, respectively) than in the published species. As with the previous Hawaiian  
453 genomes, we attribute the higher number of predicted genes in this species to a more complete  
454 and contiguous assembly, relative to the published data.

455

#### 456 **Similarity between *Montipora capitata* chromosomal and extra-chromosomal scaffolds**

457 There are 1,685 scaffolds (totaling ~101 Mbp) in the new *M. capitata* assembly that were not  
458 placed into the 14 putative chromosomes by the scaffolding software. Given that the size of the  
459 14 chromosomal sequences totals ~680 Mbp, which is close to the estimated genome size of 644  
460 Mbp, it is possible that the extra-chromosomal sequences represent retained haplotigs. To  
461 explore this issue, we compared the predicted genes in the extra-chromosomal (6,545 protein-  
462 coding genes) and chromosomal (47,839) scaffolds to determine how similar the protein content

463 is between the two sets of scaffolds and to see if the extra-chromosomal proteins tend to be  
464 contained within a single chromosome (suggesting that the extra-chromosomal sequences are  
465 likely retained haplotigs). Out of the 6,546 proteins encoded in the extra-chromosomal scaffolds,  
466 3,896 (59.53%) have hits to chromosomal proteins with > 75% query coverage and > 75%  
467 identity, and 1,623 (24.80%) have hits to chromosomal proteins with > 95% query coverage and  
468 > 95% identity. This suggests that whereas the two sets of scaffolds encode many similar  
469 (although not identical) proteins, the protein inventory of the extra chromosomal scaffolds only  
470 partially overlaps with the gene inventory of the chromosomal scaffolds (we would expect them  
471 to have a high level of overlap if they were haplotigs). Furthermore, the extra-chromosomal  
472 scaffolds encode 12% of the total predicted genes but, when analyzed separately using BUSCO,  
473 have only 1.9% of the Metazoa and 1.6% of the Eukaryota BUSCO genes recovered. This  
474 conflict between the number of predicted genes in the scaffolds and the number of BUSCO  
475 genes suggests that these scaffolds cannot be easily explained as simply unresolved haplotigs.  
476 Finally, of the 3,896 proteins with top hits in the leniently filtered dataset (hit with > 75% query  
477 coverage and > 75% identity), 2,748 (70.53%) were on scaffolds with other proteins with top hits  
478 to different chromosomes. This suggests that the extra-chromosomal scaffolds have significant  
479 structural differences when compared to the chromosomes. These results suggest that the extra-  
480 chromosomal scaffolds do not comprise retained haplotigs however, given their significant size,  
481 which increases the assembly size well above the estimated size, additional analyses will need to  
482 be done to determine the placement of these sequences in the chromosomes and the genes that  
483 they encode.

484

## 485 **Potential implications**

486 The substantial improvement in the contiguity and completeness of the assemblies and predicted  
487 genes from the Hawaiian *M. capitata*, *Poc. meandrina*, *Poc. acuta*, and *Por. compressa* species  
488 will enable many follow-up studies. The chromosome-level assembly of the *M. capitata* isolate  
489 will not only serve as a key reference genome for future population studies focusing on this  
490 species in Hawaii, but it will also enable more detailed studies on genome content (such as  
491 repeats), gene content, and gene synteny with other species from reefs across the world. The *Poc.*  
492 *acuta* genome, although not at chromosome-level resolution, is the most complete available for  
493 this genus and will be a valuable model for not only comparative analysis, but for analysis of

494 ploidy in corals. As the first assembly ever generated from a non-diploid coral, this data will  
495 open up new questions surrounding the role of ploidy in coral evolution and adaptation and how  
496 this phenomenon is involved in the lifecycle of this species and potentially other *Pocillopora*  
497 species, both in Hawai‘i and other reefs across the world. These questions are critical, because an  
498 understanding of how changes in ploidy evolve in these corals, particularly in response to stress,  
499 will help us model the response of these ecosystems to anthropogenic climate change, and may  
500 even provide a new avenue of research for the development of stress resistant “super” corals.

501

## 502 **Data availability**

503 The Omni-C data generated from the Hawaiian *M. capitata* is available from the NCBI SRA  
504 database, under BioProject PRJNA509219. The PacBio HiFi data generated from the Hawaiian  
505 *Poc. meandrina* and *Poc. acuta* are also available from the SRA database under BioProject  
506 PRJNA761443. The PacBio HiFi and Illumina data generated from the Hawaiian *Por. compressa*  
507 are available from the SRA database under BioProject PRJNA663761. The genome assemblies  
508 and predicted genes for the Hawaiian *M. capitata* is available from  
509 <http://cyanophora.rutgers.edu/montipora/> (Version 3), for *Poc. acuta* from  
510 [http://cyanophora.rutgers.edu/Pocillopora\\_acuta/](http://cyanophora.rutgers.edu/Pocillopora_acuta/) (Version 2), *Poc. meandrina* from  
511 [http://cyanophora.rutgers.edu/Pocillopora\\_meandrina/](http://cyanophora.rutgers.edu/Pocillopora_meandrina/) (Version 1), *Por. compressa* from  
512 [http://cyanophora.rutgers.edu/Porites\\_compressa/](http://cyanophora.rutgers.edu/Porites_compressa/) (Version 1). The data from the other  
513 *Montipora*, *Pocillopora*, and *Porites* species used in this study are available from their respective  
514 repositories listed in Supplementary Table S2.

515

## 516 **Additional Files**

517 **Supplementary Figure S1.** GenomeScope2 (left) and Smudgeplot (right) profiles for (A)  
518 Hawaiian *M. capitata* (this study), (B) Waiopae tide pools *M. capitata*, (C) *M. cactus*, (D) *M.*  
519 *efflorescens*, (E) *Poc. meandrina* (this study), (F) Hawaiian *Poc. acuta* (this study), (G)  
520 Indonesian *Poc. acuta*, (H) *Poc. verrucosa*, (I) *Por. compressa* (this study), (J) *Por.*  
521 *australiensis*, and (K) *Por. lutea*. The profiles were computed for each species using 21-mers  
522 generated from the trimmed short-read data listed in Supplementary Table S2.

523

## 524 **Abbreviations**

525 bp: base pairs  
526 BUSCO: Benchmarking Universal Single-Copy Orthologs  
527 Gbp: gigabase pairs  
528 HM2: HaploMerger2  
529 Kbp: Kilobase pairs  
530 Mbp: megabase pairs  
531 NCBI: National Center for Biotechnology Information  
532 PacBio: Pacific BioSciences  
533 SRA: Sequencing Read Archive  
534

### 535 **Conflict of Interests**

536 The authors declare that they have no other competing interests.  
537

### 538 **Funding**

539 This work is/was supported by the USDA National Institute of Food and Agriculture, Hatch  
540 Formula project accession number 1017848 and the National Science Foundation grant NSF-  
541 OCE 1756623 awarded to HMP. DB was supported by the National Science Foundation grant  
542 NSF-OCE 1756616, the Catalyst Science Fund grant 2020-008, the National Institute of Food  
543 and Agriculture and United States Department of Agriculture Hatch grant NJ01180, and the  
544 National Aeronautics and Space Administration grant 80NSSC19K0462. DB and HSY were also  
545 supported by the Collaborative Genome Program of the Korea Institute of Marine Science and  
546 Technology Promotion (KIMST) funded by the Ministry of Oceans and Fisheries (MOF)  
547 (20180430). JL was supported by research grants from the National Research Foundation of  
548 Korea [NRF, 2020R1C1C1010193 (JL)] and ‘The project to make multi-ministerial national  
549 biological research resources more advanced’ program through the Korea Environment Industry  
550 & Technology Institute (KEITI) funded by the Korea Ministry of Environment [MOE  
551 (2021003420004)]. EM was supported by the Paul G. Allen Family Foundation.  
552

### 553 **Author contributions**

554 DB conceived the project with HMP and JL. TGS, JML, and YJJ did the bioinformatic analyses,  
555 HSY provided sequencing resources, and HMP led the coral sample collection and processing

556 with EM. TGS wrote the manuscript draft with JML, and all authors commented on and  
557 approved the submitted version.

558

## 559 **Acknowledgements**

560 We acknowledge generous support from the research and administrative staff at the Hawai'i  
561 Institute of Marine Biology where some of this work was done.

562

## 563 **References**

- 564 1. van Oppen MJH, Koolmees EM and Veron JEN. Patterns of evolution in the scleractinian  
565 coral genus *Montipora* (Acroporidae). *Marine Biology*. 2004;144 1:9-18.  
566 doi:10.1007/s00227-003-1188-3.
- 567 2. Forsman ZH, Concepcion GT, Haverkort RD, Shaw RW, Maragos JE and Toonen RJ.  
568 Ecomorph or endangered coral? DNA and microstructure reveal hawaiian species  
569 complexes: *Montipora dilatata/flabellata/turgescens* & *M. patula/verrilli*. *PLoS One*.  
570 2010;5 12:e15021. doi:10.1371/journal.pone.0015021.
- 571 3. Schmidt-Roach S, Miller KJ, Lundgren P and Andreakis N. With eyes wide open: A  
572 revision of species within and closely related to the *Pocillopora damicornis* species  
573 complex (Scleractinia; Pocilloporidae) using morphology and genetics. *Zoological*  
574 *Journal of the Linnean Society*. 2014;170 1:1-33. doi:doi.org/10.1111/zoj.12092.
- 575 4. Cunning R, Bay RA, Gillette P, Baker AC and Traylor-Knowles N. Comparative analysis  
576 of the *Pocillopora damicornis* genome highlights role of immune system in coral  
577 evolution. *Sci Rep*. 2018;8 1:16134. doi:10.1038/s41598-018-34459-8.
- 578 5. Williams A, Pathmanathan JS, Stephens TG, Su X, Chiles EN, Conetta D, et al. Multi-  
579 omic characterization of the thermal stress phenome in the stony coral *Montipora*  
580 *capitata*. *PeerJ*. 2021;9:e12335. doi:10.7717/peerj.12335.
- 581 6. Mayfield AB, Chen YJ, Lu CY and Chen CS. The proteomic response of the reef coral  
582 *Pocillopora acuta* to experimentally elevated temperatures. *PLoS One*. 2018;13  
583 1:e0192001. doi:10.1371/journal.pone.0192001.
- 584 7. Henley EM, Quinn M, Bouwmeester J, Daly J, Zuchowicz N, Lager C, et al.  
585 Reproductive plasticity of Hawaiian *Montipora* corals following thermal stress. *Sci Rep*.  
586 2021;11 1:12525. doi:10.1038/s41598-021-91030-8.
- 587 8. Putnam HM, Davidson JM and Gates RD. Ocean acidification influences host DNA  
588 methylation and phenotypic plasticity in environmentally susceptible corals. *Evol Appl*.  
589 2016;9 9:1165-78. doi:10.1111/eva.12408.
- 590 9. Jury CP, Delano MN and Toonen RJ. High heritability of coral calcification rates and  
591 evolutionary potential under ocean acidification. *Sci Rep*. 2019;9 1:20419.  
592 doi:10.1038/s41598-019-56313-1.
- 593 10. Padilla-Gamino JL, Pochon X, Bird C, Concepcion GT and Gates RD. From parent to  
594 gamete: vertical transmission of *Symbiodinium* (Dinophyceae) ITS2 sequence  
595 assemblages in the reef building coral *Montipora capitata*. *PLoS One*. 2012;7 6:e38440.  
596 doi:10.1371/journal.pone.0038440.

- 597 11. Damjanovic K, Menendez P, Blackall LL and van Oppen MJH. Mixed-mode bacterial  
598 transmission in the common brooding coral *Pocillopora acuta*. Environ Microbiol.  
599 2020;22 1:397-412. doi:10.1111/1462-2920.14856.
- 600 12. Cunha RL, Forsman ZH, Belderok R, Knapp ISS, Castilho R and Toonen RJ. Rare coral  
601 under the genomic microscope: timing and relationships among Hawaiian *Montipora*.  
602 BMC Evol Biol. 2019;19 1:153. doi:10.1186/s12862-019-1476-2.
- 603 13. Johnston EC, Forsman ZH, Flot JF, Schmidt-Roach S, Pinzon JH, Knapp ISS, et al. A  
604 genomic glance through the fog of plasticity and diversification in *Pocillopora*. Sci Rep.  
605 2017;7 1:5991. doi:10.1038/s41598-017-06085-3.
- 606 14. Aurelle D, Pratloug M, Oury N, Haguenaer A, Gélin P, Magalon H, et al. Population  
607 genomics of *Pocillopora* corals: insights from RAD-sequencing. 2021-10-12 2021.
- 608 15. Caruso C, de Souza MR, Ruiz-Jones L, Conetta D, Hancock J, Hobbs C, et al. Genetic  
609 patterns in *Montipora capitata* across an environmental mosaic in Kāneʻohe Bay.  
610 bioRxiv. 2021:2021.10.07.463582. doi:10.1101/2021.10.07.463582.
- 611 16. Shumaker A, Putnam HM, Qiu H, Price DC, Zelzion E, Harel A, et al. Genome analysis  
612 of the rice coral *Montipora capitata*. Sci Rep. 2019;9 1:2571. doi:10.1038/s41598-019-  
613 39274-3.
- 614 17. Shinzato C, Khalturin K, Inoue J, Zayasu Y, Kanda M, Kawamitsu M, et al. Eighteen  
615 coral genomes reveal the evolutionary origin of *Acropora* strategies to accommodate  
616 environmental changes. Molecular Biology and Evolution. 2021;38 1:16-30.  
617 doi:10.1093/molbev/msaa216.
- 618 18. Helmkampf M, Bellinger MR, Geib S, Sim SB and Takabayashi M. Draft genome of the  
619 rice coral *Montipora capitata* obtained from linked-read sequencing. Genome Biol Evol.  
620 2019;11 7:2045-54. doi:10.1093/gbe/evz135.
- 621 19. Yuki Y, Go S, Yuna Z, Hiroshi Y and Chuya S. Comparative genomics highlight the  
622 importance of lineage-specific gene families in evolutionary divergence of the coral  
623 genus, *Montipora*. BMC Ecology and Evolution. 2021; doi:10.21203/rs.3.rs-944849/v1.
- 624 20. Parra G, Bradnam K and Korf I. CEGMA: A pipeline to accurately annotate core genes  
625 in eukaryotic genomes. Bioinformatics. 2007;23 9:1061-7.  
626 doi:10.1093/bioinformatics/btm071.
- 627 21. Buitrago-Lopez C, Mariappan KG, Cardenas A, Gegner HM and Voolstra CR. The  
628 genome of the cauliflower coral *Pocillopora verrucosa*. Genome Biol Evol. 2020;12  
629 10:1911-7. doi:10.1093/gbe/evaa184.
- 630 22. Vidal-Dupiol J, Chaparro C, Pratloug M, Pontarotti P, Grunau C and Mitta G.  
631 Sequencing, *de novo* assembly and annotation of the genome of the scleractinian coral,  
632 *Pocillopora acuta*. bioRxiv. 2020:698688. doi:10.1101/698688.
- 633 23. Robbins SJ, Singleton CM, Chan CX, Messer LF, Geers AU, Ying H, et al. A genomic  
634 view of the reef-building coral *Porites lutea* and its microbial symbionts. Nat Microbiol.  
635 2019;4 12:2090-100. doi:10.1038/s41564-019-0532-4.
- 636 24. Shinzato C, Takeuchi T, Yoshioka Y, Tada I, Kanda M, Broussard C, et al. Whole-  
637 genome sequencing highlights conservative genomic strategies of a stress-tolerant, long-  
638 lived scleractinian coral, *Porites australiensis* Vaughan, 1918. Genome Biol Evol.  
639 2021;13 12 doi:10.1093/gbe/evab270.
- 640 25. Wong KH and Putnam HM. The Genome of the Mustard Hill Coral, *Porites astreoides*.  
641 GIGabyte (Under Review). 2022.



- 642 26. Kenyon JC. Models of reticulate evolution in the coral genus *Acropora* based on  
643 chromosome numbers: Parallels with plants. *Evolution*. 1997;51 3:756-67.  
644 doi:10.1111/j.1558-5646.1997.tb03659.x.
- 645 27. Nurk S, Walenz BP, Rhie A, Vollger MR, Logsdon GA, Grothe R, et al. HiCanu:  
646 accurate assembly of segmental duplications, satellites, and allelic variants from high-  
647 fidelity long reads. *Genome Res*. 2020;30 9:1291-305. doi:10.1101/gr.263566.120.
- 648 28. Walker BJ, Abeel T, Shea T, Priest M, Abouelliel A, Sakthikumar S, et al. Pilon: an  
649 integrated tool for comprehensive microbial variant detection and genome assembly  
650 improvement. *PLoS One*. 2014;9 11:e112963. doi:10.1371/journal.pone.0112963.
- 651 29. Bolger AM, Lohse M and Usadel B. Trimmomatic: A flexible trimmer for Illumina  
652 sequence data. *Bioinformatics*. 2014;30 15:2114-20. doi:10.1093/bioinformatics/btu170.
- 653 30. Marcais G and Kingsford C. A fast, lock-free approach for efficient parallel counting of  
654 occurrences of *k*-mers. *Bioinformatics*. 2011;27 6:764-70.  
655 doi:10.1093/bioinformatics/btr011.
- 656 31. Benson G. Tandem repeats finder: a program to analyze DNA sequences. *Nucleic Acids*  
657 *Res*. 1999;27 2:573-80. doi:10.1093/nar/27.2.573.
- 658 32. Bao Z and Eddy SR. Automated de novo identification of repeat sequence families in  
659 sequenced genomes. *Genome Res*. 2002;12 8:1269-76. doi:10.1101/gr.88502.
- 660 33. Price AL, Jones NC and Pevzner PA. De novo identification of repeat families in large  
661 genomes. *Bioinformatics*. 2005;21 Suppl 1:i351-8. doi:10.1093/bioinformatics/bti1018.
- 662 34. Huang S, Kang M and Xu A. HaploMerger2: Rebuilding both haploid sub-assemblies  
663 from high-heterozygosity diploid genome assembly. *Bioinformatics*. 2017;33 16:2577-9.  
664 doi:10.1093/bioinformatics/btx220.
- 665 35. Simao FA, Waterhouse RM, Ioannidis P, Kriventseva EV and Zdobnov EM. BUSCO:  
666 assessing genome assembly and annotation completeness with single-copy orthologs.  
667 *Bioinformatics*. 2015;31 19:3210-2. doi:10.1093/bioinformatics/btv351.
- 668 36. Haas BJ, Papanicolaou A, Yassour M, Grabherr M, Blood PD, Bowden J, et al. *De novo*  
669 transcript sequence reconstruction from RNA-seq using the Trinity platform for reference  
670 generation and analysis. *Nat Protoc*. 2013;8 8:1494-512. doi:10.1038/nprot.2013.084.
- 671 37. Grabherr MG, Haas BJ, Yassour M, Levin JZ, Thompson DA, Amit I, et al. Full-length  
672 transcriptome assembly from RNA-Seq data without a reference genome. *Nat Biotechnol*.  
673 2011;29 7:644-52. doi:10.1038/nbt.1883.
- 674 38. Dobin A, Davis CA, Schlesinger F, Drenkow J, Zaleski C, Jha S, et al. STAR: Ultrafast  
675 universal RNA-seq aligner. *Bioinformatics*. 2013;29 1:15-21.  
676 doi:10.1093/bioinformatics/bts635.
- 677 39. Bruna T, Hoff KJ, Lomsadze A, Stanke M and Borodovsky M. BRAKER2: Automatic  
678 eukaryotic genome annotation with GeneMark-EP+ and AUGUSTUS supported by a  
679 protein database. *NAR Genom Bioinform*. 2021;3 1:lqaa108.  
680 doi:10.1093/nargab/lqaa108.
- 681 40. Lomsadze A, Burns PD and Borodovsky M. Integration of mapped RNA-Seq reads into  
682 automatic training of eukaryotic gene finding algorithm. *Nucleic Acids Res*. 2014;42  
683 15:e119. doi:10.1093/nar/gku557.
- 684 41. Stanke M, Keller O, Gunduz I, Hayes A, Waack S and Morgenstern B. AUGUSTUS: *Ab*  
685 *initio* prediction of alternative transcripts. *Nucleic Acids Res*. 2006;34 Web Server  
686 issue:W435-9. doi:10.1093/nar/gkl200.

- 687 42. Marchler-Bauer A, Bo Y, Han L, He J, Lanczycki CJ, Lu S, et al. CDD/SPARCLE:  
688 functional classification of proteins via subfamily domain architectures. *Nucleic Acids*  
689 *Res.* 2017;45 D1:D200-D3. doi:10.1093/nar/gkw1129.
- 690 43. Huerta-Cepas J, Forslund K, Coelho LP, Szklarczyk D, Jensen LJ, von Mering C, et al.  
691 Fast Genome-Wide Functional Annotation through Orthology Assignment by eggNOG-  
692 Mapper. *Molecular Biology and Evolution.* 2017;34 8:2115-22.  
693 doi:10.1093/molbev/msx148.
- 694 44. Moriya Y, Itoh M, Okuda S, Yoshizawa AC and Kanehisa M. KAAS: an automatic  
695 genome annotation and pathway reconstruction server. *Nucleic Acids Research.*  
696 2007;35:W182-W5. doi:10.1093/nar/gkm321.
- 697 45. Celis JS, Wibberg D, Ramirez-Portilla C, Rupp O, Sczyrba A, Winkler A, et al. Binning  
698 enables efficient host genome reconstruction in cnidarian holobionts. *Gigascience.*  
699 2018;7 7 doi:10.1093/gigascience/gy075.
- 700 46. Perteu G and Perteu M. GFF Utilities: GffRead and GffCompare [version 1; peer review:  
701 2 approved]. *F1000Research.* 2020;9 304 doi:10.12688/f1000research.23297.1.
- 702 47. Ranallo-Benavidez TR, Jaron KS and Schatz MC. GenomeScope 2.0 and Smudgeplot for  
703 reference-free profiling of polyploid genomes. *Nat Commun.* 2020;11 1:1432.  
704 doi:10.1038/s41467-020-14998-3.
- 705 48. Martin M. Cutadapt removes adapter sequences from high-throughput sequencing reads.  
706 *EMBnetjournal.* 2011;17 1:3. doi:10.14806/ej.17.1.200.
- 707 49. Weiss CL, Pais M, Cano LM, Kamoun S and Burbano HA. nQuire: A statistical  
708 framework for ploidy estimation using next generation sequencing. *BMC Bioinformatics.*  
709 2018;19 1:122. doi:10.1186/s12859-018-2128-z.
- 710 50. Danecek P, Bonfield JK, Liddle J, Marshall J, Ohan V, Pollard MO, et al. Twelve years  
711 of SAMtools and BCFtools. *Gigascience.* 2021;10 2 doi:10.1093/gigascience/giab008.
- 712 51. Manni M, Berkeley MR, Seppey M, Simão FA and Zdobnov EM. BUSCO Update:  
713 Novel and streamlined workflows along with broader and deeper phylogenetic coverage  
714 for scoring of eukaryotic, prokaryotic, and viral genomes. *Molecular Biology and*  
715 *Evolution.* 2021; doi:10.1093/molbev/msab199.
- 716 52. Camacho C, Coulouris G, Avagyan V, Ma N, Papadopoulos J, Bealer K, et al. BLAST+:  
717 Architecture and applications. *BMC Bioinformatics.* 2009;10:421. doi:10.1186/1471-  
718 2105-10-421.
- 719 53. Chen YB, Gonzalez-Pech RA, Stephens TG, Bhattacharya D and Chan CX. Evidence  
720 that inconsistent gene prediction can mislead analysis of dinoflagellate genomes. *J*  
721 *Phycol.* 2020;56 1:6-10. doi:10.1111/jpy.12947.

722

723 **Tables**

724 **Table S1:** Summary of coral assemblies before and after haplotype merging.

725

726 **Table S2:** Metadata for the genome and gene models downloaded for the coral species used for  
727 comparative analysis.

728

729 **Table S3:** Comparison between the published *Montipora*, *Pocillopora*, and *Porites* genomes and  
730 those generated in this study. All statistics were calculated in this study using the available  
731 genome and gene models.

732

733 **Table S4:** Results from nQuire lrdmodel ploidy estimation for the Hawaiian coral genomes  
734 analyzed in this study.

735

736

737 **Figure Legends**

738 **Figure 1:** (A) Cumulative and (B) individual length of scaffolds in the new Hawaiian *M.*  
739 *capitata* genome assembly. Scaffolds were sorted by length in descending order; each point  
740 along the x-axis of (A) and (B) represents a scaffold, with the longest scaffold being the first and  
741 the shortest being the last on the x-axis of each plot. In (A) and (B) a zoomed-in section of the  
742 larger plot is shown on the right highlighting the 40 largest scaffolds; a horizontal red line in (A)  
743 shows the total assembled bases in the new genome and a vertical dashed line in (A) and (B) is  
744 positioned after the 14th largest scaffold. GenomeScope2 linear *k*-mer distributions of the  
745 Hawaiian (C) *M. capitata*, (D) *Poc. meandrina*, (E) *Poc. acuta*, and (F) *Por. compressa* species  
746 with theoretical diploid (or triploid for *Poc. acuta*) models shown by the black lines. The  
747 GenomeScope2 profiles were computed for each species using 21-mers generated from the  
748 trimmed short-read data listed in Supplementary Table S2.

749

750 **Figure 2:** Results from BUSCO analysis run using the genomes and predicted genes from all  
751 published (including this study) *Montipora*, *Pocillopora*, and *Porites* species, plus the old  
752 version of the *M. capitata* genome that our group published in 2019 [16]. BUSCO results for  
753 each species using the (A) Metazoa dataset (genome mode), (B) Eukaryota dataset (genome  
754 mode), (C) Metazoa dataset (protein mode), and (D) Eukaryota dataset (protein mode).

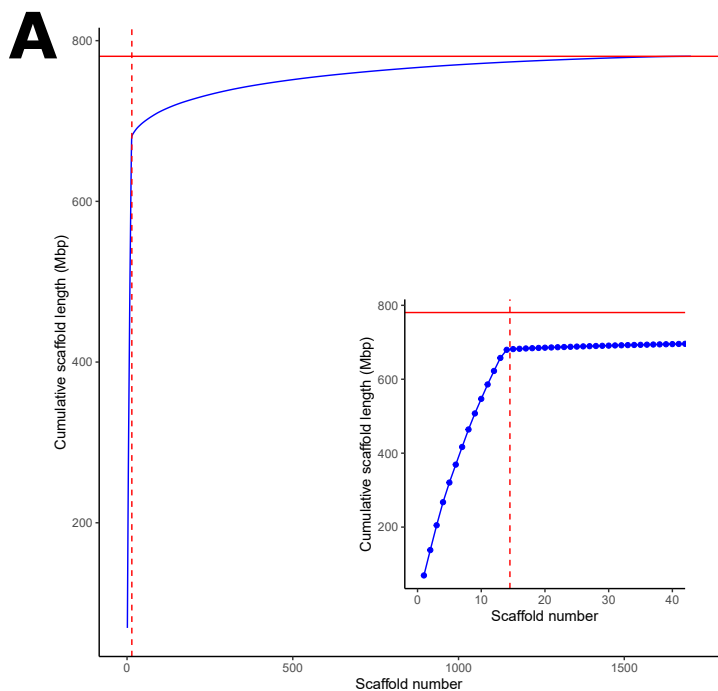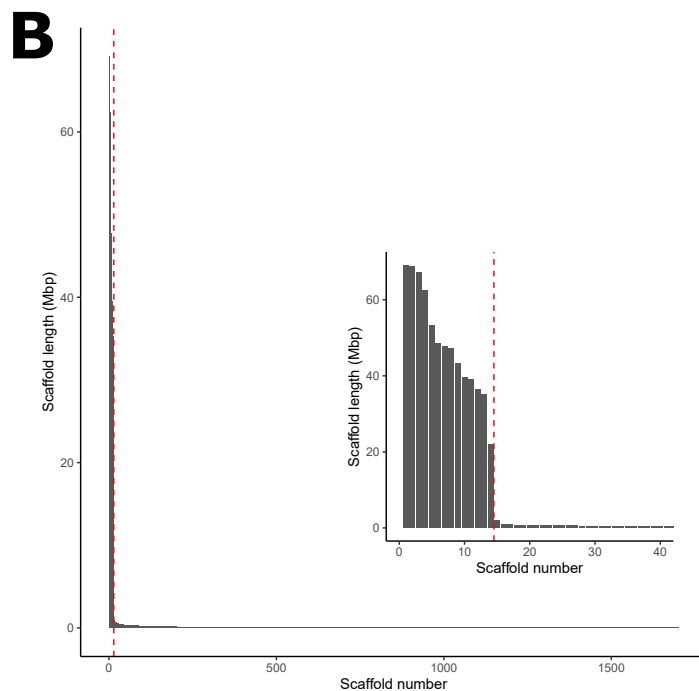

**C**

*M. capitata*

GenomeScope Profile

len:644,226,330bp uniq:50.9%  
aa:98.6% ab:1.36%  
kcov:14.7 err:0.228% dup:0.733 k:21 p:2

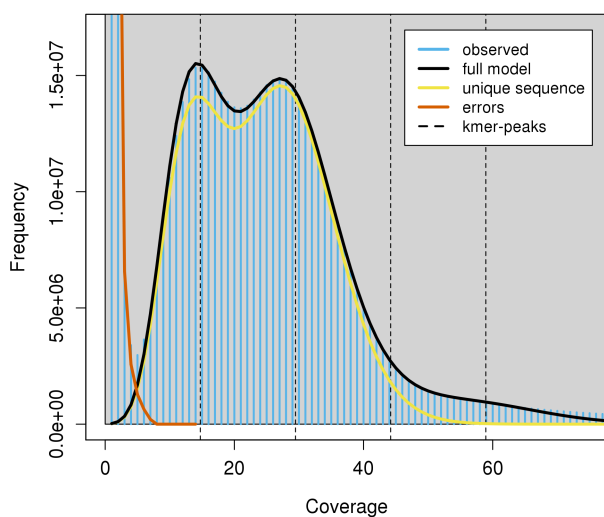

**D**

*P. meandrina*

GenomeScope Profile

len:349,144,232bp uniq:66.4%  
aa:98.5% ab:1.5%  
kcov:32.2 err:0.156% dup:0.337 k:21 p:2

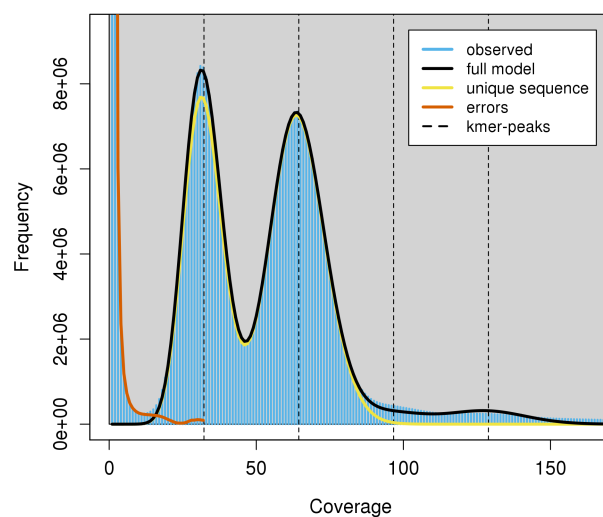

**E**

*P. acuta*

GenomeScope Profile

len:353,080,882bp uniq:65.3%  
aaa:97.3% aab:2.4% abc:0.308%  
kcov:17.7 err:0.228% dup:0.347 k:21 p:3

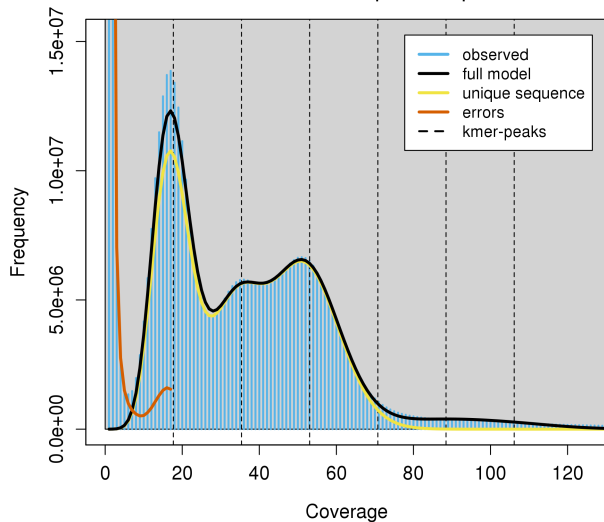

**F**

*P. compressa*

GenomeScope Profile

len:527,906,982bp uniq:58.7%  
aa:98.2% ab:1.84%  
kcov:13.9 err:0.303% dup:0.384 k:21 p:2

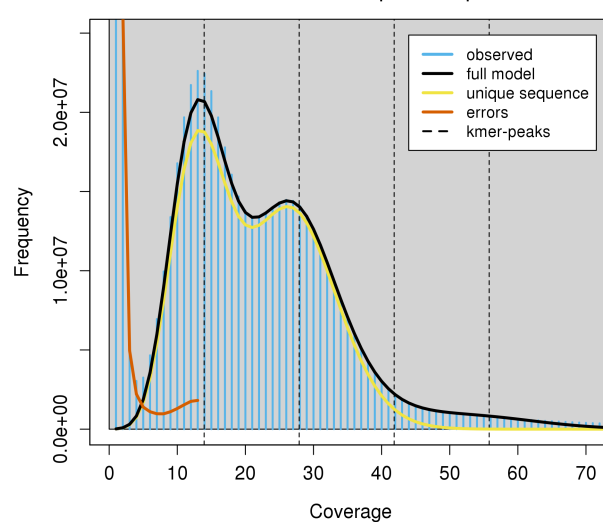

Figure 2

BUSCO Metazoa dataset (Genome mode)

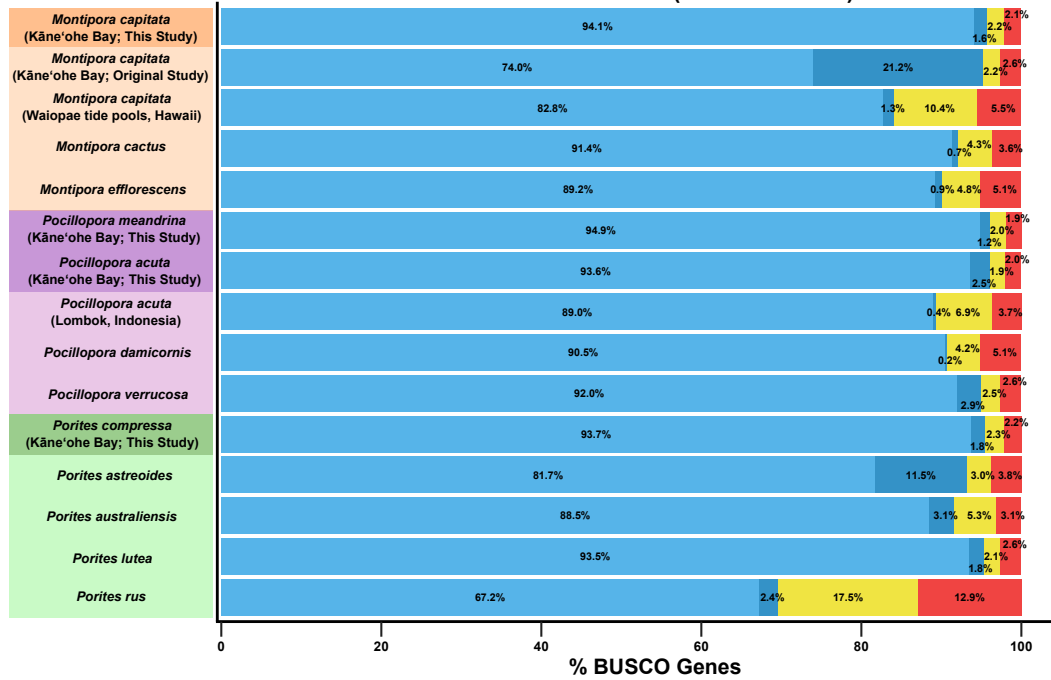

BUSCO Eukaryota dataset (Genome mode)

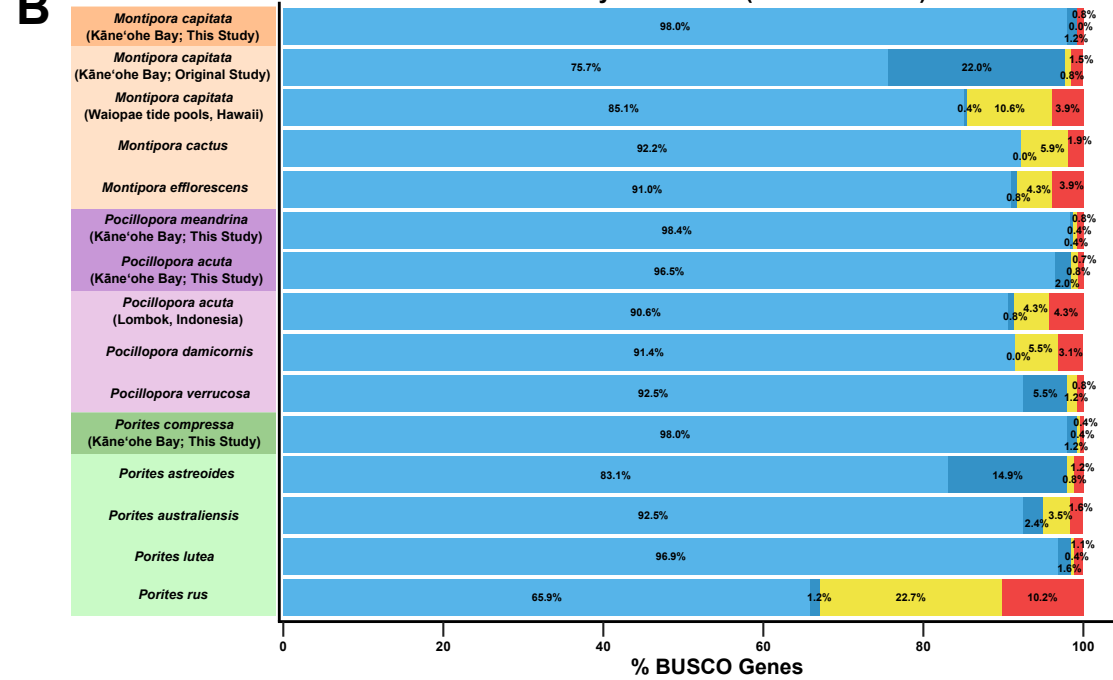

BUSCO Metazoa dataset (Protein mode)

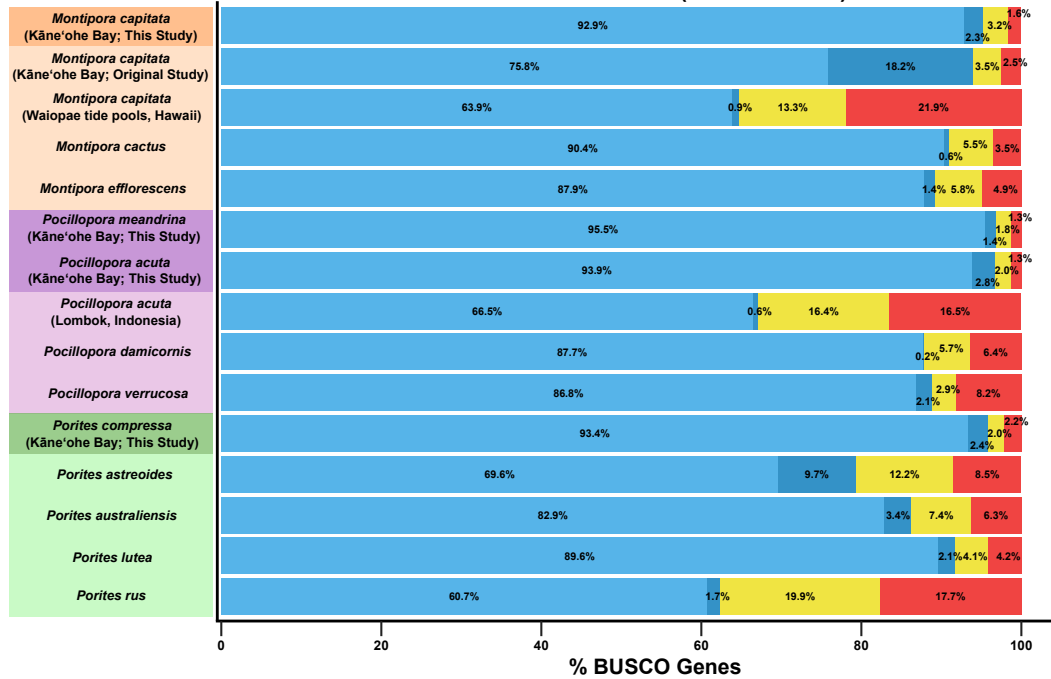

BUSCO Eukaryota dataset (Protein mode)

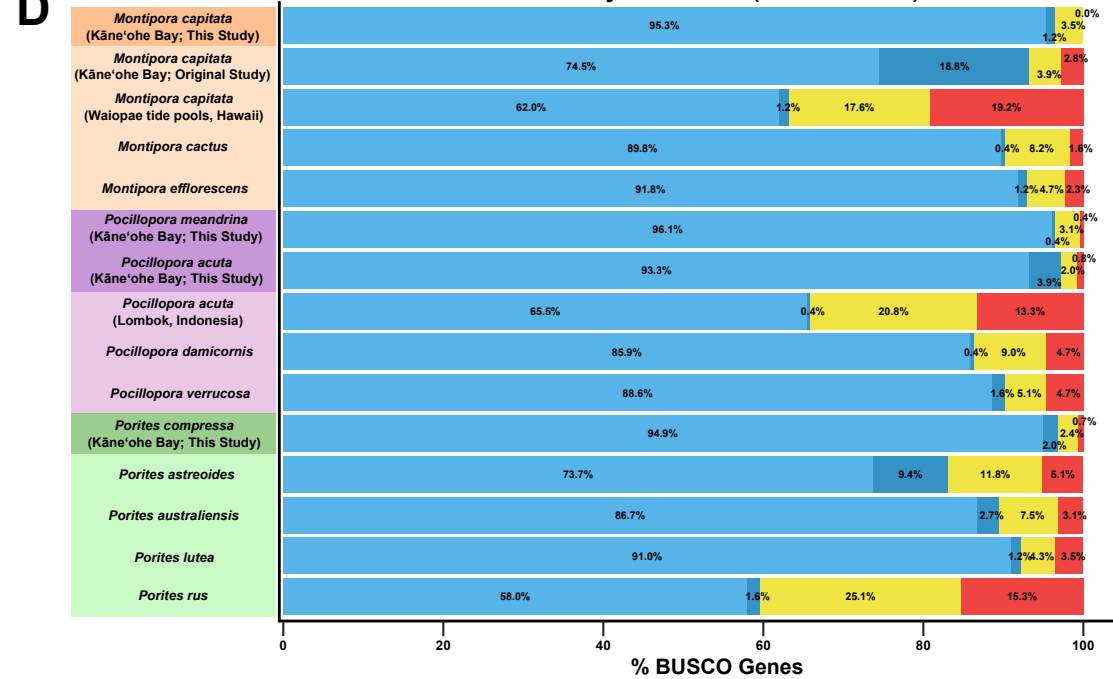

Complete (C) and single-copy (S) Complete (C) and duplicated (D) Fragmented (F) Missing (M)



Click here to access/download  
**Supplementary Material**  
Figure\_S1.pdf



Click here to access/download  
**Supplementary Material**  
Supplementary\_Tables.xlsx



Supplement: giac098_giga-d-22-00143_original_submission.pdf [file giac098_giga-d-22-00143_original_submission.pdf]
