# Supplementary material for: High-quality genome assembles from key Hawaiian coral species
Source: PubMed Central journal article supplement (PMC9646523; doi:10.1093/gigascience/giac098), 2022-11-09
Supplement: giac098_giga-d-22-00143_revision_1.pdf [file giac098_giga-d-22-00143_revision_1.pdf]

|                                       |                                                                                                                                                                                                                                                                                                                                                                                                                                                                                                                                                                                                                                                                                                                                                                                                                                                                                                                                                                                                                                                                                                                                                                                                                                                                                                                                                                                                                                                                                                                                                                                                                                                                                                                                                                                                                                                                                                                                       |                           |
|---------------------------------------|---------------------------------------------------------------------------------------------------------------------------------------------------------------------------------------------------------------------------------------------------------------------------------------------------------------------------------------------------------------------------------------------------------------------------------------------------------------------------------------------------------------------------------------------------------------------------------------------------------------------------------------------------------------------------------------------------------------------------------------------------------------------------------------------------------------------------------------------------------------------------------------------------------------------------------------------------------------------------------------------------------------------------------------------------------------------------------------------------------------------------------------------------------------------------------------------------------------------------------------------------------------------------------------------------------------------------------------------------------------------------------------------------------------------------------------------------------------------------------------------------------------------------------------------------------------------------------------------------------------------------------------------------------------------------------------------------------------------------------------------------------------------------------------------------------------------------------------------------------------------------------------------------------------------------------------|---------------------------|
| <b>Manuscript Number:</b>             | GIGA-D-22-00143R1                                                                                                                                                                                                                                                                                                                                                                                                                                                                                                                                                                                                                                                                                                                                                                                                                                                                                                                                                                                                                                                                                                                                                                                                                                                                                                                                                                                                                                                                                                                                                                                                                                                                                                                                                                                                                                                                                                                     |                           |
| <b>Full Title:</b>                    | High-quality genome assemblies from key Hawaiian coral species                                                                                                                                                                                                                                                                                                                                                                                                                                                                                                                                                                                                                                                                                                                                                                                                                                                                                                                                                                                                                                                                                                                                                                                                                                                                                                                                                                                                                                                                                                                                                                                                                                                                                                                                                                                                                                                                        |                           |
| <b>Article Type:</b>                  | Data Note                                                                                                                                                                                                                                                                                                                                                                                                                                                                                                                                                                                                                                                                                                                                                                                                                                                                                                                                                                                                                                                                                                                                                                                                                                                                                                                                                                                                                                                                                                                                                                                                                                                                                                                                                                                                                                                                                                                             |                           |
| <b>Funding Information:</b>           | USDA National Institute of Food and Agriculture (1017848)                                                                                                                                                                                                                                                                                                                                                                                                                                                                                                                                                                                                                                                                                                                                                                                                                                                                                                                                                                                                                                                                                                                                                                                                                                                                                                                                                                                                                                                                                                                                                                                                                                                                                                                                                                                                                                                                             | Dr Hollie M. Putnam       |
|                                       | National Science Foundation (NSF-OCE 1756623)                                                                                                                                                                                                                                                                                                                                                                                                                                                                                                                                                                                                                                                                                                                                                                                                                                                                                                                                                                                                                                                                                                                                                                                                                                                                                                                                                                                                                                                                                                                                                                                                                                                                                                                                                                                                                                                                                         | Dr Hollie M. Putnam       |
|                                       | National Science Foundation (NSF-OCE 1756616)                                                                                                                                                                                                                                                                                                                                                                                                                                                                                                                                                                                                                                                                                                                                                                                                                                                                                                                                                                                                                                                                                                                                                                                                                                                                                                                                                                                                                                                                                                                                                                                                                                                                                                                                                                                                                                                                                         | Dr Debashish Bhattacharya |
|                                       | Catalyst Science Fund (2020-008)                                                                                                                                                                                                                                                                                                                                                                                                                                                                                                                                                                                                                                                                                                                                                                                                                                                                                                                                                                                                                                                                                                                                                                                                                                                                                                                                                                                                                                                                                                                                                                                                                                                                                                                                                                                                                                                                                                      | Dr Debashish Bhattacharya |
|                                       | National Institute of Food and Agriculture and United States Department of Agriculture (NJ01180)                                                                                                                                                                                                                                                                                                                                                                                                                                                                                                                                                                                                                                                                                                                                                                                                                                                                                                                                                                                                                                                                                                                                                                                                                                                                                                                                                                                                                                                                                                                                                                                                                                                                                                                                                                                                                                      | Dr Debashish Bhattacharya |
|                                       | National Aeronautics and Space Administration (80NSSC19K0462)                                                                                                                                                                                                                                                                                                                                                                                                                                                                                                                                                                                                                                                                                                                                                                                                                                                                                                                                                                                                                                                                                                                                                                                                                                                                                                                                                                                                                                                                                                                                                                                                                                                                                                                                                                                                                                                                         | Dr Debashish Bhattacharya |
|                                       | Ministry of Oceans and Fisheries (20180430)                                                                                                                                                                                                                                                                                                                                                                                                                                                                                                                                                                                                                                                                                                                                                                                                                                                                                                                                                                                                                                                                                                                                                                                                                                                                                                                                                                                                                                                                                                                                                                                                                                                                                                                                                                                                                                                                                           | Dr Hwan Su Yoon           |
|                                       | National Research Foundation of Korea (2020R1C1C1010193)                                                                                                                                                                                                                                                                                                                                                                                                                                                                                                                                                                                                                                                                                                                                                                                                                                                                                                                                                                                                                                                                                                                                                                                                                                                                                                                                                                                                                                                                                                                                                                                                                                                                                                                                                                                                                                                                              | Dr JunMo Lee              |
|                                       | Korea Ministry of Environment (2021003420004)                                                                                                                                                                                                                                                                                                                                                                                                                                                                                                                                                                                                                                                                                                                                                                                                                                                                                                                                                                                                                                                                                                                                                                                                                                                                                                                                                                                                                                                                                                                                                                                                                                                                                                                                                                                                                                                                                         | Dr JunMo Lee              |
|                                       | Paul G. Allen Family Foundation                                                                                                                                                                                                                                                                                                                                                                                                                                                                                                                                                                                                                                                                                                                                                                                                                                                                                                                                                                                                                                                                                                                                                                                                                                                                                                                                                                                                                                                                                                                                                                                                                                                                                                                                                                                                                                                                                                       | Dr Eva Majerová           |
| <b>Abstract:</b>                      | <p><b>Background</b><br/>Coral reefs house about 25% of marine biodiversity and are critical for the livelihood of many communities by providing food, tourism revenue, and protection from wave surge. These magnificent ecosystems are under existential threat from anthropogenic climate change. Whereas extensive ecological and physiological studies have addressed coral response to environmental stress, high-quality reference genome data are lacking for many of these species. The latter issue hinders efforts to understand the genetic basis of stress resistance and to design informed coral conservation strategies.</p> <p><b>Results</b><br/>We report genome assemblies from four key Hawaiian coral species, <i>Montipora capitata</i>, <i>Pocillopora acuta</i>, <i>Pocillopora meandrina</i>, and <i>Porites compressa</i>. These species, or members of these genera, are distributed worldwide and therefore of broad scientific and ecological importance. For <i>M. capitata</i>, an initial assembly was generated from short-read Illumina and long-read PacBio data, which was then scaffolded into 14 putative chromosomes using Omni-C sequencing. For <i>Poc. acuta</i>, <i>Poc. meandrina</i>, and <i>Por. compressa</i>, high-quality assemblies were generated using short-read Illumina and long-read PacBio data. The <i>Poc. acuta</i> assembly is from a triploid individual, making it the first reference genome of a non-diploid coral animal.</p> <p><b>Conclusions</b><br/>These assemblies are significant improvements over available data and provide invaluable resources for supporting multi-omics studies into coral biology, not just in Hawai'i, but also in other regions, where related species exist. The <i>Poc. acuta</i> assembly provides a platform for studying polyploidy in corals and its role in genome evolution and stress adaptation in these organisms.</p> |                           |
| <b>Corresponding Author:</b>          | Timothy Gordon Stephens, Ph.D.<br>Rutgers University: Rutgers The State University of New Jersey<br>New Brunswick, New Jersey UNITED STATES                                                                                                                                                                                                                                                                                                                                                                                                                                                                                                                                                                                                                                                                                                                                                                                                                                                                                                                                                                                                                                                                                                                                                                                                                                                                                                                                                                                                                                                                                                                                                                                                                                                                                                                                                                                           |                           |
| <b>Corresponding Author Secondary</b> |                                                                                                                                                                                                                                                                                                                                                                                                                                                                                                                                                                                                                                                                                                                                                                                                                                                                                                                                                                                                                                                                                                                                                                                                                                                                                                                                                                                                                                                                                                                                                                                                                                                                                                                                                                                                                                                                                                                                       |                           |

|                                                      |                                                                                                                                                                                                                                                                                                                                                                                                                                                                                                                                                                                                                                                                                                                                                                                                                                                                                                                                                                                                                                                                                                                                                                                                                                                                                                                                                                                                                                                                                                                                                                                                                                                                                                                                                                                                                                                                                                                                                                                                                                                                                                                                                                                                                                                                                                                                                                                                                                                                                                                                                                                                                                                                                                                                    |
|------------------------------------------------------|------------------------------------------------------------------------------------------------------------------------------------------------------------------------------------------------------------------------------------------------------------------------------------------------------------------------------------------------------------------------------------------------------------------------------------------------------------------------------------------------------------------------------------------------------------------------------------------------------------------------------------------------------------------------------------------------------------------------------------------------------------------------------------------------------------------------------------------------------------------------------------------------------------------------------------------------------------------------------------------------------------------------------------------------------------------------------------------------------------------------------------------------------------------------------------------------------------------------------------------------------------------------------------------------------------------------------------------------------------------------------------------------------------------------------------------------------------------------------------------------------------------------------------------------------------------------------------------------------------------------------------------------------------------------------------------------------------------------------------------------------------------------------------------------------------------------------------------------------------------------------------------------------------------------------------------------------------------------------------------------------------------------------------------------------------------------------------------------------------------------------------------------------------------------------------------------------------------------------------------------------------------------------------------------------------------------------------------------------------------------------------------------------------------------------------------------------------------------------------------------------------------------------------------------------------------------------------------------------------------------------------------------------------------------------------------------------------------------------------|
| <b>Information:</b>                                  |                                                                                                                                                                                                                                                                                                                                                                                                                                                                                                                                                                                                                                                                                                                                                                                                                                                                                                                                                                                                                                                                                                                                                                                                                                                                                                                                                                                                                                                                                                                                                                                                                                                                                                                                                                                                                                                                                                                                                                                                                                                                                                                                                                                                                                                                                                                                                                                                                                                                                                                                                                                                                                                                                                                                    |
| <b>Corresponding Author's Institution:</b>           | Rutgers University: Rutgers The State University of New Jersey                                                                                                                                                                                                                                                                                                                                                                                                                                                                                                                                                                                                                                                                                                                                                                                                                                                                                                                                                                                                                                                                                                                                                                                                                                                                                                                                                                                                                                                                                                                                                                                                                                                                                                                                                                                                                                                                                                                                                                                                                                                                                                                                                                                                                                                                                                                                                                                                                                                                                                                                                                                                                                                                     |
| <b>Corresponding Author's Secondary Institution:</b> |                                                                                                                                                                                                                                                                                                                                                                                                                                                                                                                                                                                                                                                                                                                                                                                                                                                                                                                                                                                                                                                                                                                                                                                                                                                                                                                                                                                                                                                                                                                                                                                                                                                                                                                                                                                                                                                                                                                                                                                                                                                                                                                                                                                                                                                                                                                                                                                                                                                                                                                                                                                                                                                                                                                                    |
| <b>First Author:</b>                                 | Timothy Gordon Stephens, Ph.D.                                                                                                                                                                                                                                                                                                                                                                                                                                                                                                                                                                                                                                                                                                                                                                                                                                                                                                                                                                                                                                                                                                                                                                                                                                                                                                                                                                                                                                                                                                                                                                                                                                                                                                                                                                                                                                                                                                                                                                                                                                                                                                                                                                                                                                                                                                                                                                                                                                                                                                                                                                                                                                                                                                     |
| <b>First Author Secondary Information:</b>           |                                                                                                                                                                                                                                                                                                                                                                                                                                                                                                                                                                                                                                                                                                                                                                                                                                                                                                                                                                                                                                                                                                                                                                                                                                                                                                                                                                                                                                                                                                                                                                                                                                                                                                                                                                                                                                                                                                                                                                                                                                                                                                                                                                                                                                                                                                                                                                                                                                                                                                                                                                                                                                                                                                                                    |
| <b>Order of Authors:</b>                             | <p>Timothy Gordon Stephens, Ph.D.</p> <p>JunMo Lee</p> <p>YuJin Jeong</p> <p>Hwan Su Yoon</p> <p>Hollie M. Putnam</p> <p>Eva Majerová</p> <p>Debashish Bhattacharya</p>                                                                                                                                                                                                                                                                                                                                                                                                                                                                                                                                                                                                                                                                                                                                                                                                                                                                                                                                                                                                                                                                                                                                                                                                                                                                                                                                                                                                                                                                                                                                                                                                                                                                                                                                                                                                                                                                                                                                                                                                                                                                                                                                                                                                                                                                                                                                                                                                                                                                                                                                                            |
| <b>Order of Authors Secondary Information:</b>       |                                                                                                                                                                                                                                                                                                                                                                                                                                                                                                                                                                                                                                                                                                                                                                                                                                                                                                                                                                                                                                                                                                                                                                                                                                                                                                                                                                                                                                                                                                                                                                                                                                                                                                                                                                                                                                                                                                                                                                                                                                                                                                                                                                                                                                                                                                                                                                                                                                                                                                                                                                                                                                                                                                                                    |
| <b>Response to Reviewers:</b>                        | <p>Dear Editor,</p> <p>We thank the two reviewers for their constructive comments on our earlier manuscript. In this submission, we revised our manuscript based on all of these comments, and to improve readability. We have added two new supplementary tables listing the SRA Run IDs and results of functional annotation, and a figure showing our assembly and gene prediction workflow. We also added a more detailed description of the symbiont filtering approach and the results of functional annotation.</p> <p>Reviewer #1: Stephens et al. reported de novo genome assemblies from four coral species in Hawaii. They constructed a chromosome-level assembly of <i>Montipora capitata</i> using the Omni-C sequencing technology. These genome assemblies surpass previous ones from the same species or genera in contiguity and BUSCO completeness. These genome assemblies will be helpful to the coral research community. I have a few comments for the authors to consider.</p> <p>The authors would benefit from proof-read by an English editor to correct grammar and improve the manuscript's readability.</p> <p>We have extensively reviewed the grammar and phrasing of the manuscript to improve its readability.</p> <p>Lines 139-151, 182-191<br/>I think it is better to summarize the information of the sequence data in tables than to describe it in the text.</p> <p>We have added a new supplementary table (Table S1) listing the IDs of the SRA Runs used for genome assembly and gene prediction in this study. We have removed the lists of Run IDs from the main text and now refer to the new table where appropriate.</p> <p>L144-154: "The PacBio reads from <i>M. capitata</i> (78.3 Gbp; Supplementary Table S1) and <i>Por. compressa</i> (63.3 Gbp) were generated using the PacBio RSII platform (giving the '-pacbio' parameter to the CANU assembler). The PacBio reads for <i>Poc. meandrina</i> (311.8 Gbp; Supplementary Table S1), and <i>Poc. acuta</i> (239.1 Gbp) were generated using the PacBio HiFi platform (giving the '-pacbio-hifi' parameter to the CANU assembler). An error correction step (nucleotide correction of assembly) using the initial assemblies of <i>M. capitata</i> (1.2 Gbp; Supplementary Table S2), <i>Por. compressa</i> (1.0 Gbp), <i>Poc. meandrina</i> (0.7 Gbp), and <i>Poc. acuta</i> (1.1 Gbp) was done using bowtie2 (v2.4.2; default options) [31] and the Pilon program (v1.23; default options) [28] with the Illumina short-read sequencing data (27.4 Gbp for <i>M. capitata</i>; 20.9 Gbp for <i>Por. compressa</i>; 27.2 Gbp for <i>Poc. meandrina</i>, and 23.0 Gbp for <i>Poc. acuta</i>; Supplementary Table S1)."</p> |

L202-205: "Quality trimming and adapter removal from the RNA sequencing (RNA-seq) data in the Hawaiian coral species (77.5 Gbp for *M. capitata*, 76.5 Gbp for *Por. compressa*, 656.7 Gbp for *Poc. acuta*, and 10.6 Gbp for *Poc. meandrina*; Supplementary Table S1) were done using Trimmomatic (v0.39; default options) [29]."

L527-529: "The SRA Run IDs of the Omni-C data generated from the Hawaiian *M. capitata*, the PacBio and Illumina genome data used for genome assembly, and the RNA-seq data used for gene prediction are listed in Supplementary Table S1 for each species."

Lines 203-205

Results of functional annotation are not described.

We had added to the manuscript additional text describing these results and a new supplementary table (Table S8) that lists the number of functionally annotated genes in each species.

L422-424: "In the new assembly, 56.68% of the predicted protein-coding genes were assigned putative functions using CD-Search, 44.26% using eggNOG-mapper, and 21.20% using KAAS (Supplementary Table S8)."

L442-446: "In *Poc. acuta*, 67.76% of the predicted protein-coding genes were assigned putative functions using CD-Search, 49.76% using eggNOG-mapper, and 32.35% using KAAS, and in *Poc. meandrina*, 69.44% of the predicted protein-coding genes were assigned putative functions using CD-Search, 51.76% using eggNOG-mapper, and 33.66% using KAAS (Supplementary Table S8)."

L469-471: "In *Por. compressa*, 63.91% of the predicted protein-coding genes were assigned putative functions using CD-Search, 46.22% using eggNOG-mapper, and 27.48% using KAAS (Supplementary Table S8)."

L783-784: "Table S8: Number of predicted protein-coding genes in each of the new Hawaiian coral genomes with functional annotations."

Reviewer #2: In this work, Stephens et al present improved reference genomes from four Hawaiian coral species using a combination of short and long read sequencing as well as linkage information in one assembly. They also sequence the first triploid coral. I believe this data will be a valuable resource to the larger coral community and are thus a good fit for a GigaScience Data Note. Overall, the methods are largely sound, appropriate and reproducible. Some small suggestions to improve are:

1) The manuscript would benefit from workflow diagrams describing the entire workflow and potentially a separate diagram for the assembly and annotation pipeline.

We agree with the reviewer and have added a diagram of the genome assembly, gene prediction, and functional annotation workflow to the manuscript.

L141-142: "A diagram depicting the genome assembly, gene prediction, and functional annotation workflow used for each of the Hawaiian coral species is presented in Figure 1."

L787-790: "Figure 1: Diagram depicting the genome assembly, gene prediction, and functional annotation workflow deployed in this study to assemble each of the new Hawaiian coral genomes. Programs are presented in green boxes and datasets in dark orange boxes, arrows show the flow of data through the workflow. Major input and output datasets are highlighted with bold text."

2) The improved assemblies will be beneficial to the research community. Could you clarify whether the old assemblies were utilised in any way during the construction of the improved assemblies?

We thank the Reviewer for their support of the importance of these data to the research community. The old assemblies were not used in any way during the

construction of the improved assemblies. As we describe in the methods, the “long-read genome sequencing data (PacBio) of the Hawaiian coral species were initially assembled using CANU (v2.2; default options)”. That is, each of the improved assemblies were constructed directly from the long and short read data and not using the existing genome assemblies as a start point. As we feel that this is adequately described in the manuscript, we have made no further changes.

3) L204: "Functional annotation of gene models was done using the NCBI Conserved Domain Search (CD-Search) [42], the eggNOG-mapper [43], and the KEGG Automatic Annotation Server (KAAS)". Is this functional data described in the manuscript? Is it available?

We will be making the results of functional annotation available through our lab website and the GigaDB data repository. We have also added to the manuscript additional text describing the functional annotation results, as well as a new supplementary table (Table S8) that lists the number of functionally annotated genes in each species.

L529-535: “The genome assemblies, predicted genes, and functional annotations for the Hawaiian *M. capitata* is available from <http://cyanophora.rutgers.edu/montipora/> (Version 3), for *Poc. acuta* from [http://cyanophora.rutgers.edu/Pocillopora\\_acuta/](http://cyanophora.rutgers.edu/Pocillopora_acuta/) (Version 2), *Poc. meandrina* from [http://cyanophora.rutgers.edu/Pocillopora\\_meandrina/](http://cyanophora.rutgers.edu/Pocillopora_meandrina/) (Version 1), *Por. compressa* from [http://cyanophora.rutgers.edu/Porites\\_compressa/](http://cyanophora.rutgers.edu/Porites_compressa/) (Version 1). The data associated with this manuscript are also available from GigaDB.”

L422-424: “In the new assembly, 56.68% of the predicted protein-coding genes were assigned putative functions using CD-Search, 44.26% using eggNOG-mapper, and 21.20% using KAAS (Supplementary Table S8).”

L442-446: “In *Poc. acuta*, 67.76% of the predicted protein-coding genes were assigned putative functions using CD-Search, 49.76% using eggNOG-mapper, and 32.35% using KAAS, and in *Poc. meandrina*, 69.44% of the predicted protein-coding genes were assigned putative functions using CD-Search, 51.76% using eggNOG-mapper, and 33.66% using KAAS (Supplementary Table S8).”

L469-471: “In *Por. compressa*, 63.91% of the predicted protein-coding genes were assigned putative functions using CD-Search, 46.22% using eggNOG-mapper, and 27.48% using KAAS (Supplementary Table S8).”

L783-784: “Table S8: Number of predicted protein-coding genes in each of the new Hawaiian coral genomes with functional annotations.”

4) You note large differences in the number of predicted genes between species and mention assemblies qualities may impact this. Was there anything characteristic about the genes found uniquely in *Por. Compress* versus the other assemblies? Did you examine whether there are any functional differences between the genes?

We thank the reviewer for their insightful comment and agree that an exploration of the genes that are unique to the *Por. compressa* genome would make for an interesting follow-up study. We however think that such an analysis is outside the scope of a GigaScience Data Note article because it would require extensive reanalysis of the published *Porites* genomes (to ensure the conclusions drawn from the analysis are not the result of differences in assembly and gene prediction quality or methodology) and the exploration and discussion of the literature on *Porites* and coral genome evolution. We are currently performing follow-up analyses of the genomes that we are publishing in this study, plus all published coral genomes, to explore how the different forces that have shaped the genome evolution of different coral groups. As such, we believe that a rigorous analysis of the genes that are unique to the *Por. compressa* genome is outside the scope of a GigaScience Data Note article and we have made no additional changes to the manuscript.

5) You state "the best (longest) gene models were manually selected based on results of BLASTp search" however this is not always true. For the two methods, do you have the breakdown for the number of times the transcripts differed and if so which method

predicted the longer transcript?

When gene models from the two types of gene prediction approaches are visualized, using for example Geneious Prime, the differently predicted gene models are easily recognized. 'The best (longest) gene models' means that the "best" gene models from the two prediction approaches were selected based on a web-BLASTp search and selection of the longest non-chimeric gene models. We agree with the Reviewer that a BLASTp search will not always return the "true" gene model, however, we propose that a gene model with multiple BLASTp hits to proteins in an updated reference database should be regarded as the strongest evidence of the correct gene structure in the absence of other evidence. To select the longest non-chimeric gene models, we compared gene models (not transcripts) constructed by BRAKER using assembled transcripts or RNA-seq reads as evidence for exons. Further, both type of gene models were used because assembled transcriptome data could generally (but not always) make longer gene models, however, it can also sometimes result in chimeric gene models when UTR regions of two closely related genes overlap. There for, we used gene models from these two complementary methods, and evidence of potential chimeric gene models based on the blast results compared to reference proteins, as the basis for our selection of the "best" non-chimeric gene models. We have rephased this section of the manuscript to make this point clearer. We did not keep track of the number of differently predicted gene models or the number of times one type of prediction was correct over the other.

L213-217: "When the gene models predicted in the same region of the genome by the two gene prediction approaches (i.e., RNA-seq and assembled transcript-based BRAKER gene models) differed, the best (e.g., longest non-chimeric) gene model was manually selected, based on the results of a web-BLASTp search (e-value cutoff = 1.e-5 cutoff)."

6) Could you further explain how symbiont sequence data was handled? For one species you say "from a colony that was greatly reduced in algal symbionts" but for others no such claims are made. You speak of general contamination filtering strategies but given this is coral you might want to specifically describe if anything specific was done for the handling of symbiont sequence.

For *M. capitata*, *Poc. acuta*, and *Poc. meandrina*, DNA was extracted from bleached coral nubbins, which would have reduced algal symbiont densities, and for *Por. compressa*, DNA was extracted from sperm, which should be free from algal symbionts. As the reviewer highlighted, this is described in the methods for *M. capitata* and *Por. compressa* but not for *Poc. acuta*, and *Poc. meandrina*. We have added these missing details to the methods section of the manuscript.

L92-93 & 104-105: "This nubbin was selected for DNA extraction as it was bleached and would have a greatly reduced algal symbiont density."

We have added a detailed description of the symbiont sequence screening workflow to the main text of the manuscript; two additional supplementary tables were added that describe the symbiont genome assemblies used for screening and the putative functions of the coral scaffolds identified as having similarity to symbiont genomes above our chosen thresholds.

L160-176: "An additional step was performed to identify any scaffolds in the coral genome assemblies that are putatively derived from the algal (Symbiodiniaceae) symbionts. Each of the four assemblies was compared against a custom database of all published Symbiodiniaceae genomes [23, 31-35] (Supplementary Table S3) using BLASTn (v2.10.1; -max\_target\_seqs 2000). The resulting BLAST hits were filtered, retaining only those with an e-value < 1e-20 and a bitscore > 1000. Hits to the *Cladocopium* sp. C15 genome [23] were also removed because this assembly is from a holobiont sequencing project (i.e., was assembled from a metagenome sample) and is, therefore, more likely to be contaminated with coral sequences than the other Symbiodiniaceae data that were derived from unialgal cultures. Overlapping filtered BLAST hits were merged and their coverage of each coral scaffold was calculated using bedtools (v2.29.2) [36]. The regions covered by merged BLAST hits on scaffolds with >10% and >1% of their bases covered by BLASTn hits were extracted and

|                                                                                                                                                                                                                                                                                                                                                                                                                                    |                                                                                                                                                                                                                                                                                                                                                                                                                                                                                                                                                                                                                                                                                                                                                                                                                                                                                                                                                                                                                                                                                                                                                                                                                                                                                                                                                                                                                                                                                                                                                                                                                                                                                                                                                                                                                                                                                                                                                                                                                                                                                     |
|------------------------------------------------------------------------------------------------------------------------------------------------------------------------------------------------------------------------------------------------------------------------------------------------------------------------------------------------------------------------------------------------------------------------------------|-------------------------------------------------------------------------------------------------------------------------------------------------------------------------------------------------------------------------------------------------------------------------------------------------------------------------------------------------------------------------------------------------------------------------------------------------------------------------------------------------------------------------------------------------------------------------------------------------------------------------------------------------------------------------------------------------------------------------------------------------------------------------------------------------------------------------------------------------------------------------------------------------------------------------------------------------------------------------------------------------------------------------------------------------------------------------------------------------------------------------------------------------------------------------------------------------------------------------------------------------------------------------------------------------------------------------------------------------------------------------------------------------------------------------------------------------------------------------------------------------------------------------------------------------------------------------------------------------------------------------------------------------------------------------------------------------------------------------------------------------------------------------------------------------------------------------------------------------------------------------------------------------------------------------------------------------------------------------------------------------------------------------------------------------------------------------------------|
|                                                                                                                                                                                                                                                                                                                                                                                                                                    | <p>compared against the NCBI nt database using the online BLASTn tool (default settings; accessed 21 July 2022). All of the regions on scaffolds with &gt;10% and &gt;1% hit coverage had similarity to coral rRNA sequences in the NCBI nt database (Supplementary Table S4), suggesting that their similarity to Symbiodiniaceae genomes does not represent contamination. Therefore, no additional scaffolds were removed from the coral genome assemblies.”</p> <p>L767-771: “Table S3: List of Symbiodiniaceae genomes used to assess symbiont contamination in the coral genome assemblies.</p> <p>Table S4: Top 10 BLASTn hits against the NCBI's nt database for regions of coral scaffolds with greater than a given coverage of hits to Symbiodiniaceae assembled genomes.”</p> <p>7) In Figure 1A/B, it would be clearer to highlight the region blown up in the magnified images.</p> <p>We agree with the Reviewer that highlighting the magnified regions would make Figure 1A and 1B (now Figure 2) clearer. We have added green bars to each of the panels to highlight the magnified regions.</p> <p>L795-798: “In (A) and (B) a zoomed-in section of the larger plot (indicated by a green bar along the x-axis) is shown on the right highlighting the 40 largest scaffolds; a horizontal red line in (A) shows the total assembled bases in the new genome and a vertical dashed line in (A) and (B) is positioned after the 14th largest scaffold.”</p> <p>8) L437 "caused by the presence haplotigs" -&gt; typo "of haplotigs"</p> <p>We have corrected this typo in the main text.</p> <p>L458-463: “This suggests that the higher number of predicted genes in the Hawaiian Pocillopora species is not caused by the presence of haplotigs in the genome assembly, although this likely contributes to the slightly higher number of duplicated BUSCO genes in the Hawaiian Poc. acuta, or by the presence of fragmented genes models, because the number of fragmented BUSCO genes and the gene statistics suggest that the majority are full length.”</p> |
| <b>Additional Information:</b>                                                                                                                                                                                                                                                                                                                                                                                                     |                                                                                                                                                                                                                                                                                                                                                                                                                                                                                                                                                                                                                                                                                                                                                                                                                                                                                                                                                                                                                                                                                                                                                                                                                                                                                                                                                                                                                                                                                                                                                                                                                                                                                                                                                                                                                                                                                                                                                                                                                                                                                     |
| <b>Question</b>                                                                                                                                                                                                                                                                                                                                                                                                                    | <b>Response</b>                                                                                                                                                                                                                                                                                                                                                                                                                                                                                                                                                                                                                                                                                                                                                                                                                                                                                                                                                                                                                                                                                                                                                                                                                                                                                                                                                                                                                                                                                                                                                                                                                                                                                                                                                                                                                                                                                                                                                                                                                                                                     |
| Are you submitting this manuscript to a special series or article collection?                                                                                                                                                                                                                                                                                                                                                      | No                                                                                                                                                                                                                                                                                                                                                                                                                                                                                                                                                                                                                                                                                                                                                                                                                                                                                                                                                                                                                                                                                                                                                                                                                                                                                                                                                                                                                                                                                                                                                                                                                                                                                                                                                                                                                                                                                                                                                                                                                                                                                  |
| <p><b>Experimental design and statistics</b></p> <p>Full details of the experimental design and statistical methods used should be given in the Methods section, as detailed in our <a href="#">Minimum Standards Reporting Checklist</a>. Information essential to interpreting the data presented should be made available in the figure legends.</p> <p>Have you included all the information requested in your manuscript?</p> | Yes                                                                                                                                                                                                                                                                                                                                                                                                                                                                                                                                                                                                                                                                                                                                                                                                                                                                                                                                                                                                                                                                                                                                                                                                                                                                                                                                                                                                                                                                                                                                                                                                                                                                                                                                                                                                                                                                                                                                                                                                                                                                                 |
| <b>Resources</b>                                                                                                                                                                                                                                                                                                                                                                                                                   | Yes                                                                                                                                                                                                                                                                                                                                                                                                                                                                                                                                                                                                                                                                                                                                                                                                                                                                                                                                                                                                                                                                                                                                                                                                                                                                                                                                                                                                                                                                                                                                                                                                                                                                                                                                                                                                                                                                                                                                                                                                                                                                                 |

|                                                                                                                                                                                                                                                                                                                                                                                                                                                                                                                                                         |            |
|---------------------------------------------------------------------------------------------------------------------------------------------------------------------------------------------------------------------------------------------------------------------------------------------------------------------------------------------------------------------------------------------------------------------------------------------------------------------------------------------------------------------------------------------------------|------------|
| <p>A description of all resources used, including antibodies, cell lines, animals and software tools, with enough information to allow them to be uniquely identified, should be included in the Methods section. Authors are strongly encouraged to cite <a href="#">Research Resource Identifiers</a> (RRIDs) for antibodies, model organisms and tools, where possible.</p> <p>Have you included the information requested as detailed in our <a href="#">Minimum Standards Reporting Checklist</a>?</p>                                             |            |
| <p><b>Availability of data and materials</b></p> <p>All datasets and code on which the conclusions of the paper rely must be either included in your submission or deposited in <a href="#">publicly available repositories</a> (where available and ethically appropriate), referencing such data using a unique identifier in the references and in the “Availability of Data and Materials” section of your manuscript.</p> <p>Have you have met the above requirement as detailed in our <a href="#">Minimum Standards Reporting Checklist</a>?</p> | <p>Yes</p> |

# High-quality genome assemblies from key Hawaiian coral species

Timothy G. Stephens ([ts942@sebs.rutgers.edu](mailto:ts942@sebs.rutgers.edu))<sup>1,\*</sup>, JunMo Lee ([leejunmo331@gmail.com](mailto:leejunmo331@gmail.com))<sup>2</sup>, YuJin Jeong ([lppl0826@knu.ac.kr](mailto:lppl0826@knu.ac.kr))<sup>2</sup>, Hwan Su Yoon ([hsyoon2011@skku.edu](mailto:hsyoon2011@skku.edu))<sup>3</sup>, Hollie M. Putnam ([hputnam@uri.edu](mailto:hputnam@uri.edu))<sup>4</sup>, Eva Majerová ([majerova@hawaii.edu](mailto:majerova@hawaii.edu))<sup>5</sup>, and Debashish Bhattacharya ([dbhattac@rutgers.edu](mailto:dbhattac@rutgers.edu))<sup>1</sup>

<sup>1</sup>Department of Biochemistry and Microbiology, Rutgers University, New Brunswick, NJ 08901, USA.

<sup>2</sup>Department of Oceanography, Kyungpook National University, Daegu, Buk-gu 41566, Korea.

<sup>3</sup>Department of Biological Sciences, Sungkyunkwan University, Suwon 16419, Korea.

<sup>4</sup>Department of Biological Sciences, University of Rhode Island; Kingston, RI 02881, USA.

<sup>5</sup>Hawai'i Institute of Marine Biology, PO Box 1346 Kāne'ohe HI 96744, USA.

\*Corresponding author ([ts942@sebs.rutgers.edu](mailto:ts942@sebs.rutgers.edu))

Timothy Gordon Stephens [0000-0003-1554-7175];

JunMo Lee [0000-0002-5610-543X];

YuJin Jeong [0000-0003-3097-7747];

Hwan Su Yoon [0000-0001-9507-0105];

Hollie M Putnam [0000-0003-2322-3269];

Eva Majerová [0000-0001-7815-7890];

Debashish Bhattacharya [0000-0003-0611-1273]



1 **Abstract**

2

3 **Background**

4 Coral reefs house about 25% of marine biodiversity and are critical for the livelihood of many  
5 communities by providing food, tourism revenue, and protection from wave surge. These  
6 magnificent ecosystems are under existential threat from anthropogenic climate change. Whereas  
7 extensive ecological and physiological studies have addressed coral response to environmental  
8 stress, high-quality reference genome data are lacking for many of these species. The latter issue  
9 hinders efforts to understand the genetic basis of stress resistance and to design informed coral  
10 conservation strategies.

11 **Results**

12 We report genome assemblies from four key Hawaiian coral species, *Montipora capitata*,  
13 *Pocillopora acuta*, *Pocillopora meandrina*, and *Porites compressa*. These species, or members  
14 of these genera, are distributed worldwide and therefore of broad scientific and ecological  
15 importance. For *M. capitata*, an initial assembly was generated from short-read Illumina and  
16 long-read PacBio data, which was then scaffolded into 14 putative chromosomes using Omni-C  
17 sequencing. For *Poc. acuta*, *Poc. meandrina*, and *Por. compressa*, high-quality assemblies were  
18 generated using short-read Illumina and long-read PacBio data. The *Poc. acuta* assembly is from  
19 a triploid individual, making it the first reference genome of a non-diploid coral animal.

20 **Conclusions**

21 These assemblies are significant improvements over available data and provide invaluable  
22 resources for supporting multi-omics studies into coral biology, not just in Hawai‘i, but also in  
23 other regions, where related species exist. The *Poc. acuta* assembly provides a platform for  
24 studying polyploidy in corals and its role in genome evolution and stress adaptation in these  
25 organisms.

26

27 **Keywords**

28 Coral; Scleractinia; *Montipora capitata*; *Pocillopora acuta*; *Pocillopora meandrina*; *Porites*  
29 *compressa*; chromosome-level genome assembly; ploidy; triploid

30

31

## 32 **Background**

33 *Montipora capitata* (NCBI:txid46704, marinespecies.org:taxname:287697), *Pocillopora acuta*  
34 (NCBI:txid1491507, marinespecies.org:taxname:759099), *Pocillopora meandrina*  
35 (NCBI:txid46732, marinespecies.org:taxname:206964), and *Porites*  
36 *compressa* (NCBI:txid46720, marinespecies.org:taxname:207236) are species of scleractinian  
37 corals that are widespread in the Hawaiian Islands, with *M. capitata* and *Por. compressa* being  
38 dominant reef builders. These species are members of cosmopolitan genera, with closely related  
39 taxa inhabiting reefs across the Great Barrier Reef and the Coral Triangle [1-3], as well as other  
40 regions, such as *Pocillopora* in Panama [4]. In recent years, due to their critical importance to  
41 Hawaiian reef ecosystems and the growing risks posed by climate change, these four species  
42 have become the subject of many stress (including thermal [5-7] and acidification [8, 9]),  
43 microbiome [10, 11], and population genomic [12-15] studies (among many others). Given this  
44 heightened interest, there is a pressing need to generate high-quality reference genome data from  
45 Hawaiian species to empower future research.

46  
47 A genome assembly for *M. capitata* was published in 2019 by our group [16] using Pacific  
48 Biosciences (PacBio) RSII data. This assembly was significantly larger (886 Mbp) than other  
49 coral genomes available at that time (ca. 300-500 Mbp), and is larger than any *Montipora* species  
50 genome [17, 18] that has since been published. This initial assembly contains a high number  
51 (>18% [19]) of duplicated BUSCO genes, suggesting the presence of haplotigs (i.e., sequences  
52 derived from different homologous chromosomes) that were not removed during the assembly  
53 process. There are currently published genomes for three *Pocillopora* [4, 20, 21] species, none of  
54 which are from Hawai‘i. One of these is a *Poc. acuta* isolate collected from Lombok, Indonesia  
55 [22] that was generated using Illumina short-read data. This genome assembly is highly  
56 fragmented, consisting of 168,465 scaffolds, and whereas it does have a scaffold N50 of 147  
57 Kbp, the contig N50 is only 9,649 bp. The completeness of the genes predicted in this genome is  
58 not high, with only 56% of the core eukaryotic genes [20] identified in the reported “*ab initio*”  
59 predicted gene set. A second set of predicted genes inferred using RNA-seq evidence (termed the  
60 “experimental” set) contains 93% of core eukaryotic genes, however, this set does not have  
61 predicted open reading frames (i.e., it includes both coding and non-coding genes), making it  
62 difficult to make a direct comparison with other published genomes. There are currently three

63 *Porites* species with published genomes [23-25] which are of high completeness and reasonable  
64 contiguity, however, none are from Hawai‘i.

65  
66 As the cost of genome sequencing, in particular, long-read methods continues to decrease,  
67 opportunities arise to generate genome data from understudied species or species that have  
68 genomes of lower quality that would benefit from the improvement gained from newer  
69 technologies. Furthermore, methods such as Dovetail Omni-C, which provides long range  
70 linkage information, enables the generation of genome assemblies that are at (or near)  
71 chromosomal-level resolution. In this study, we generated an improved reference genome  
72 assembly for our previously published Hawaiian *M. capitata* using long-read PacBio, short-read  
73 Illumina, and newly generated Omni-C data, that is of chromosome-level resolution. The 14  
74 largest scaffolds resulting from this assembly likely represent the 14 chromosomes predicted in  
75 *Montipora* species [26]. We also generated, using PacBio HiFi data (i.e., circular consensus  
76 corrected PacBio reads), high-quality genome assemblies for two *Pocillopora* and one *Porites*  
77 species. The *Poc. acuta* isolate is a triploid, making it the first non-diploid coral genome to be  
78 sequenced.

79

## 80 **Data description**

### 81 **Sample collection and processing**

82 The four coral species targeted in this study were collected from Kāne‘ohe Bay, Hawai‘i. For *M.*  
83 *capitata*, the initial PacBio and Illumina-based assembly was generated using sperm DNA (see  
84 [16]). Input DNA for the Dovetail Genomics approach, using the Omni-C assay and workflow,  
85 was a bleached nubbin (a ~5 x 5cm fragment) from a colony that was greatly reduced in algal  
86 symbionts (GPS coordinates: 21.474465, -157.834468; SRA BioSample: SAMN21845729). This  
87 fragment was collected under Hawai‘i Department of Aquatic Resources Special Activity Permit  
88 2019-60, snap frozen in liquid nitrogen, and stored at -80°C before it was shipped on dry ice to  
89 Dovetail Genomics for processing using their Omni-C assay and workflow.

90

91 For *Poc. meandrina*, one nubbin (a ~5 x 5cm fragment) was collected from an adult colony from  
92 Reef 13 (GPS coordinates: 21.450803, -157.794692) on 2020-09-05 (SRA BioSample:  
93 SAMN21845732, SAMN21845733, and SAMN21845734) under DAR-2021-33, Amendment

94 No. 1 to HIMB. This nubbin was selected for DNA extraction as it was bleached and would have  
95 a greatly reduced algal symbiont density. High molecular weight DNA was extracted using the  
96 QIAGEN Genomic-tip 100/G (Cat #: 10223), the QIAGEN Genomic DNA Buffer Set (Cat #:  
97 19060), QIAGEN RNase A (100mg/mL concentration: Cat #: 19101), QIAGEN Proteinase K  
98 (Cat #: 19131), and DNA lo-bind tubes (Eppendorf Cat #: 022431021). Briefly, a clipping of the  
99 coral fragment was placed in a cleaned and sterilized mortar and pestle and ground to powder on  
100 liquid nitrogen. High molecular weight DNA was then extracted according to the manufacturer's  
101 instructions for preparation of tissue samples in the QIAGEN Genomic DNA Handbook (version  
102 06/2015).

103

104 For *Poc. acuta*, one nubbin was collected from an adult colony from a reef next to the Hawai'i  
105 Institute of Marine Biology (GPS coordinates: 21.436056, -157.786861) on 2018-09-05 (SRA  
106 BioSample: SAMN22898959) under Special Activity Permit 2019-60. This nubbin was selected  
107 for DNA extraction as it was bleached and would have a greatly algal reduced symbiont density.  
108 High molecular weight DNA was extracted using the QIAGEN Genomic-tip 100/G approach  
109 outlined for *Poc. meandrina* above. High molecular weight DNA from *Poc. meandrina* and *Poc.*  
110 *acuta* was sent to DNA Link Sequencing Lab for sequencing on their PacBio Sequel 2 (PacBio  
111 Sequel II System, RRID:SCR\_017990) and Illumina NovaSeq 6000 platforms (Illumina  
112 NovaSeq 6000 Sequencing System, RRID:SCR\_020150).

113

114 For *Por. compressa*, DNA was extracted from sperm released at 11 pm on 09 June 2017 from a  
115 single colony in Kāne'ōhe Bay, O'ahu. Total genomic DNA was extracted using the CTAB  
116 protocol and the DNeasy Blood and Tissue Kit (Qiagen, Germany) with subsequent clean-up  
117 steps. Genomic data were generated using the PacBio RS II platform (PacBio RS II Sequencing  
118 System, RRID:SCR\_017988). To increase the sequence quality of the assembly, a polishing step  
119 was done using the Arrow consensus caller. To this end, we generated a total of 20 Gbp of high-  
120 throughput sequencing data (Illumina HiSeq2000; 100 bp paired-end library) as follows. The  
121 whole-genome sequencing library of *Por. compressa* was prepared using the Truseq Nano DNA  
122 Prep Kit (550bp) protocol following the manufacturer's instructions. Randomly sheared genomic  
123 DNA was ligated with index adapters and purified. The ligated products were size-selected for

124 300-400 bp and amplified using the adapter-specific primers. Library quality was checked using  
125 a 2100 BioAnalyzer (Agilent Technologies, Santa Clara, CA, USA).

126

### 127 **RNA Extractions**

128 RNA was extracted by clipping a small piece of coral using clippers sterilized in 10% bleach,  
129 deionized water, isopropanol, and RNase free water, and then placed in a 2 mL Fisherbrand™  
130 Pre-Filled Bead Mill microcentrifuge tube containing 0.5mm glass beads (Fisher Scientific  
131 Catalog. No 15-340-152) with 1000 µL of Zymo DNA/RNA shield. A two-step extraction  
132 protocol was used to extract RNA and DNA, with the first step as a “soft” homogenization to  
133 reduce shearing of RNA or DNA. Tubes were vortexed at high speed for 1 and 2 minutes for  
134 *Poc. acuta* and *M. capitata* fragments, respectively. The supernatant was removed and  
135 designated as the “soft extraction”. Second, an additional 500 µL of Zymo DNA/RNA shield was  
136 added to the bead tubes and placed in a Qiagen TissueLyser for 1 minute at 20 Hz. The  
137 supernatant was removed and designated as the “hard extraction”. Subsequently, 300 µL of  
138 sample from both soft and hard homogenate was extracted with the Zymo Quick-DNA/RNA  
139 Miniprep Plus Kit (Zymo Cat D7003) Protocol with the following modifications. RNA quantity  
140 (ng\_µL) was measured with a ThermoFisher Qubit Fluorometer, DNA quality was assessed  
141 using gel electrophoresis, and RNA quality was measured with an Agilent TapeStation System.

142

### 143 **Haploid genome assembly of Hawaiian coral species**

144 A diagram depicting the genome assembly, gene prediction, and functional annotation workflow  
145 used for each of the Hawaiian coral species is presented in Figure 1. The long-read genome  
146 sequencing data (PacBio) from the Hawaiian coral species were initially assembled using  
147 CANU (Canu, RRID:SCR\_015880) (v2.2; default options) [27]. The PacBio reads from *M.*  
148 *capitata* (78.3 Gbp; Supplementary Table S1) and *Por. compressa* (63.3 Gbp) were generated  
149 using the PacBio RSII platform (giving the ‘-pacbio’ parameter to the CANU assembler). The  
150 PacBio reads for *Poc. meandrina* (311.8 Gbp; Supplementary Table S1), and *Poc. acuta* (239.1  
151 Gbp) were generated using the PacBio HiFi platform (giving the ‘-pacbio-hifi’ parameter to the  
152 CANU assembler). An error correction step (nucleotide correction of assembly) using the initial  
153 assemblies of *M. capitata* (1.2 Gbp; Supplementary Table S2), *Por. compressa* (1.0 Gbp), *Poc.*  
154 *meandrina* (0.7 Gbp), and *Poc. acuta* (1.1 Gbp) was done using bowtie2 (Bowtie 2,

155 RRID:SCR\_016368) v2.4.2 [31] and the Pilon program (Pilon, RRID:SCR\_014731) v1.23 [28]  
156 with the Illumina short-read sequencing data (27.4 Gbp for *M. capitata*; 20.9 Gbp for *Por.*  
157 *compressa*; 27.2 Gbp for *Poc. meandrina*, and 23.0 Gbp for *Poc. acuta*; Supplementary Table  
158 S1). Before using the Illumina data, quality trimming and adapter clipping of the raw reads were  
159 done using Trimmomatic (Trimmomatic, RRID:SCR\_011848) v0.39 [29]. To remove potential  
160 contaminant sequences, assembly results were analyzed using BLASTn (BLASTN,  
161 RRID:SCR\_001598) ( $e$ -value cutoff =  $1e^{-10}$ ) analysis with the nr database (downloaded: Feb.  
162 2019). To estimate genome size and ploidy of the Hawaiian coral species,  $k$ -mer analysis was  
163 done using Jellyfish (21-mer) [30] with the Illumina short-read data.

164 An additional step was performed to identify any scaffolds in the coral genome  
165 assemblies that are putatively derived from the algal (Symbiodiniaceae) symbionts. Each of the  
166 four assemblies was compared against a custom database of all published Symbiodiniaceae  
167 genomes [23, 31-35] (Supplementary Table S3) using BLASTn (v2.10.1; -max\_target\_seqs  
168 2000). The resulting BLAST hits were filtered, retaining only those with an  $e$ -value  $< 1e^{-20}$  and a  
169 bitscore  $> 1000$ . Hits to the *Cladocopium* sp. C15 genome [23] were also removed because this  
170 assembly is from a holobiont sequencing project (i.e., was assembled from a metagenome  
171 sample) and is, therefore, more likely to be contaminated with coral sequences than the other  
172 Symbiodiniaceae data that were derived from unialgal cultures. Overlapping filtered BLAST hits  
173 were merged and their coverage of each coral scaffold was calculated using bedtools (v2.29.2)  
174 [36]. The regions covered by merged BLAST hits on scaffolds with  $>10\%$  and  $>1\%$  of their  
175 bases covered by BLASTn hits were extracted and compared against the NCBI nt database using  
176 the online BLASTn tool (default settings; accessed 21 July 2022). All of the regions on scaffolds  
177 with  $>10\%$  and  $>1\%$  hit coverage had similarity to coral rRNA sequences in the NCBI nt  
178 database (Supplementary Table S4), suggesting that their similarity to Symbiodiniaceae genomes  
179 does not represent contamination. Therefore, no additional scaffolds were removed from the  
180 coral genome assemblies.

181 To reconstruct haploid genomes using the initial assemblies of the Hawaiian coral  
182 species, we used the following protocol. First, we predicted repetitive DNA sequences in the  
183 initial assemblies and constructed soft-masked assemblies. Repetitive DNA elements were  
184 identified using the RepeatModeler pipeline (RepeatModeler, RRID:SCR\_015027) v2.0. [37-39]  
185 which includes RECON (RECON, RRID:SCR\_021170) v1.08 and RepeatScout (RepeatScout,

186 RRID:SCR\_014653) v1.0.6 as *de novo* repeat finding programs. We used the default options for  
187 l-mer size and removed low-complexity and tandem repeats. To classify repeat content, the  
188 libraries were constructed from giri rebase (Rebase, RRID:SCR\_021169). The consensus  
189 sequences of repeat families were used to analyze corresponding repeat regions with  
190 RepeatMasker (RepeatMasker, RRID:SCR\_012954) v4.1.1. The second step in the protocol was  
191 to infer assemblies as haploid genomes using the HaploMerger2 (HM2) program (the latest  
192 release, 20180603) [40] and the soft-masked assemblies. The third step was validation of  
193 duplicated eukaryotic core genes in the haploid genome assemblies using the Benchmarking  
194 Universal Single-Copy Orthologs (BUSCO, RRID:SCR\_015008) program (v4.1.4; genome-  
195 based analysis with eukaryota\_odb10 dataset) [41]. The final step was to repeat the HM2  
196 analysis until the number of duplicated eukaryotic core genes decreased to under 1%, or the  
197 value could not be decreased any further in the haploid assemblies (Supplementary Table S2).  
198 The purged assembly of *M. capitata* was sent to Dovetail Genomics along with an additional  
199 coral fragment (see above) that was used for high molecular weight DNA extraction for analysis  
200 using their Omni-C assay and HiRise v2.2.0 assembly workflow. A total of 56.5 million read-  
201 pairs of Dovetail Genomics Omni-C sequencing data (Supplementary Table S1) were generated  
202 and used for scaffolding. This step produced a final genome assembly that was at putative  
203 chromosome level resolution for *M. capitata*.

204

### 205 **Gene prediction and functional annotation**

206 Quality trimming and adapter removal from the RNA sequencing (RNA-seq) data in the  
207 Hawaiian coral species (77.5 Gbp for *M. capitata*, 76.5 Gbp for *Por. compressa*, 656.7 Gbp for  
208 *Poc. acuta*, and 10.6 Gbp for *Poc. meandrina*; Supplementary Table S1) were done using  
209 Trimmomatic (v0.39; default options) [29]. These data were assembled using Trinity (Trinity,  
210 RRID:SCR\_013048) v2.11 with the default option of *de novo* transcriptome assembly [42, 43].  
211 The trimmed RNA-seq raw reads and the assembled transcriptomes were aligned to the haploid  
212 genome assemblies using the STAR (STAR, RRID:SCR\_004463) aligner (v2.6.0c; default  
213 options for the raw reads) and the STARlong aligner (v2.6.0c; --runMode alignReads --  
214 alignIntronMin 10 --seedPerReadNmax 100000 --seedPerWindowNmax 1000 --  
215 alignTranscriptsPerReadNmax 100000 --alignTranscriptsPerWindowNmax 10000), respectively  
216 [44]. Based on each alignment (i.e., bam file), gene predictions were done using the BRAKER2

217 pipeline v2.1.5 [45], which includes GeneMark-ET [46] and AUGUSTUS (Augustus,  
218 RRID:SCR\_008417) [47] with default (automatically optimized) options. When the gene models  
219 predicted in the same region of the genome by the two gene prediction approaches (i.e., RNA-  
220 seq and assembled transcript-based BRAKER gene models) differed, the best (e.g., longest non-  
221 chimeric) gene model was manually selected, based on the results of a web-BLASTp search (*e*-  
222 value cutoff =  $1.e^{-5}$  cutoff). Functional annotation of gene models was done using the NCBI  
223 Conserved Domain Search (CD-Search) [48], the eggNOG-mapper [49], and the KEGG  
224 Automatic Annotation Server (KAAS) [50].

225

### 226 **Genomes of corals used for comparative analysis**

227 The genome assemblies and predicted genes from the four *Montipora* (*M. cactus* [17], *M.*  
228 *capitata* from the Hawaiian Waiopae tide pools [18], *M. efflorescens* [17], and the previous  
229 version of the Hawaiian *M. capitata* isolate [16] that we assembled in this study), three  
230 *Pocillopora* (*Poc. damicornis* [4], *Poc. acuta* [from Indonesia] [22], and *Poc. verrucosa* [21]),  
231 and four *Porites* (*Por. astreoides* [25], *Por. australiensis* [24], *Por. lutea* [23], and *Por. rus* [51])  
232 species were retrieved from their respective repositories (Supplementary Table S5) and used for  
233 comparative analysis with the assemblies generated in this study. The *M. cactus* and *M.*  
234 *efflorescens* genome assemblies [17] were filtered, retaining only scaffolds identified by Yuki,  
235 Go [19] as not being haplotigs. The updated gene models from Yuki, Go [19] were used in place  
236 of those available with the original assemblies. For species where just the gene modes were  
237 provided (in gff format), gffread v0.11.6 (-S -x cdsfile -y pepfile) [52] was used to infer the  
238 protein and CDS sequences. Open Reading Frames (ORFs) were predicted in the RNA-Seq  
239 based “experimental” genes predicted in the Indonesian *Poc. acuta* isolate [22], using  
240 TransDecoder (TransDecoder, RRID:SCR\_017647) v5.5.0. HMMER (Hmmer,  
241 RRID:SCR\_005305) v3.1b2 was used to query the candidate ORFs against the Pfam (Pfam,  
242 RRID:SCR\_004726) database (release 33.1; i-Evalue < 0.001) and BLASTp (BLASTP,  
243 RRID:SCR\_001010) (v2.10.1; -max\_target\_seqs 1 -evalue 1e-5) was used to search candidate  
244 ORFs against the SwissProt database (release 2020\_05), with the resulting homology  
245 information used by TransDecoder (TransDecoder, RRID:SCR\_017647) to guide ORF  
246 prediction. Only the longest transcript per gene had ORFs predicted and single-exon genes



247 without strand information were assumed to be from the forward/positive strand (TransDecoder  
248 will change the strand of single exon genes if required, based on the results of ORF prediction).

249

### 250 **Genome size estimation**

251 The genome size and ploidy of the new (this study) and published *Montipora*, *Pocillopora*, and  
252 *Porites* species (except the Indonesian *Poc. acuta* which does not have read data available to  
253 download, *Por. rus* which only had reads from the holobiont [i.e., reads from the coral, algal  
254 symbiont, and associated bacteria] available, and *Por. astreoides* which only had PacBio long  
255 reads available) were estimated using the GenomeScope2 and Smudgeplot tools [53]. For each  
256 species, the available short-read genome sequencing data were retrieved from NCBI SRA  
257 (Supplementary Table S5), trimmed using cutadapt (cutadapt, RRID:SCR\_011841) v3.5 [54] (-q  
258 20 --minimum-length 25 -a AGATCGGAAGAGCACACGTCTGAACTCCAGTCA -A  
259 AGATCGGAAGAGCGTCGTGTAGGGAAAGAGTGT), and decomposed into *k*-mers using  
260 Jellyfish [30] (v2.3.0; k=21). The *k*-mer frequency histogram produced by Jellyfish (using the  
261 ‘jellyfish histo’ command) was imported into GenomeScope2 with a theoretical diploid model  
262 fitted with the data (Fig. 2C, D, and F and Supplementary Fig. S1); a theoretical triploid model  
263 was fitted with the Hawaiian *Poc. acuta* data (Fig. 2E and Supplementary Fig. S1F) because it  
264 was found to be a triploid after initial analysis using Smudgeplot and GenomeScope2.  
265 Smudgeplot was run using the *k*-mers extracted by Jellyfish (Jellyfish, RRID:SCR\_005491),  
266 with thresholds for the lower *k*-mer coverage cutoff (just after the minimum between the initial  
267 error peak and the first major peak) and upper *k*-mer coverage cutoff (8.5 times the coverage of  
268 the first major coverage peak) chosen for each species using the GenomeScope2 profile shown in  
269 Supplementary Figure S1. The “smudge plots” shown in Supplementary Figure S1 were  
270 generated using the haploid coverage values estimated by GenomeScope2. The cutoffs used  
271 when running Smudgeplot for each species are shown in Supplementary Table S5.

272

### 273 **Confirmation of sample ploidy**

274 The program nQuire [55] (retrieved 7/7/2021), which uses the frequency distribution of bi-allelic  
275 variant sites inferred from aligned reads to model the ploidy of a sample, was used to verify the  
276 ploidy of the four genomes sequenced in this study. Briefly, bowtie2 (Bowtie 2,  
277 RRID:SCR\_016368) v2.4.4 (‘--very-sensitive --no-unal’) was used to align the trimmed (by

278 cutadapt; described previously) Illumina short-reads against their respective genome assemblies;  
279 aligned reads were coordinate sorted using samtools (SAMTOOLS, RRID:SCR\_002105) v1.11  
280 [56]. The aligned and sorted BAM files were converted into “BIN” files using nQuire (‘nQuire  
281 create -q 20 -c 20 -x’), filtering for reads with a minimum mapping quality of 20 and sites with a  
282 minimum coverage of 20. Denoised BIN files were created using the “nQuire denoise” command  
283 run on the initial BIN files. The delta Log-Likelihood values for each ploidy model (diploid,  
284 triploid, and tetraploid) was calculated by the “nQuire lrdmodel” command for each of the initial  
285 and denoised BIN files. The lower the delta Log-Likelihood value of a given model the better fit  
286 it is for the frequency distribution of the bi-allelic variant sites extracted from the aligned reads;  
287 the ploidy of the sample is there for assumed to be the ploidy model with the lowest delta Log-  
288 Likelihood value. The nQuire results are shown in Supplementary Table S6.

289

### 290 **Assessment of completeness using BUSCO**

291 The “completeness” of the genome assemblies and predicted genes (published in this study and  
292 from previous studies; Supplementary Table S7) were assessed using BUSCO v5.0.0 (‘--mode  
293 genome’ and ‘--mode protein’, respectively) with the eukaryota\_odb10 (release 2020-09-10) and  
294 metazoa\_odb10 datasets (release 2021-02-24) [57].

295

### 296 **Analysis of extra-chromosomal scaffolds**

297 The proteins predicted on the extra-chromosomal scaffolds (i.e., the scaffolds that do not  
298 comprise the 14 putative chromosomes) in the *M. capitata* assembly were compared against the  
299 proteins from the chromosomal scaffolds using BLASTp v1.10.1 [58]; the resulting hits were  
300 filtered using an *e*-value cutoff  $< 1 \times 10^{-5}$ . Additional filtering steps were applied to produce two  
301 sets of hits: for the first (lenient) set, hits were retained if they had a query coverage of  $> 75\%$   
302 and an identity  $> 75\%$ , with the single best (*e*-value-based) top hit kept for each query sequence;  
303 for the second (stringent) set, hits were retained if they had a query coverage of  $> 95\%$  and an  
304 identity  $> 95\%$ , with the single best (*e*-value-based) top hit kept for each query sequence. The  
305 lenient filtered top hits were used to determine if the extra-chromosomal scaffolds tend to encode  
306 genes that have similarity to a single, or multiple, chromosomes. For this analysis, only proteins  
307 with top hits to the chromosomal scaffolds (i.e., proteins with hits that have an *e*-value  $< 1 \times 10^{-5}$ ,

308 query coverage > 75%, and an identity > 75%) were considered, and only scaffolds with multiple  
309 proteins with top hits were considered.

310

## 311 **Data Validation and Quality Control**

### 312 *Montipora capitata* genome assemblies

313 The *M. capitata* assembly generated in the study (assembly version V3.0; hereinafter the “new”  
314 Hawaiian *M. capitata* genome assembly) has fewer assembled bases (781 Mbp vs. 886 Mbp) and  
315 scaffolds (1,699 vs. 3,043), and a vastly improved N50 (47.7 Mbp vs. 0.54 Mbp; Supplementary  
316 Table S7), compared to the assembly of the same Hawaiian *M. capitata* isolate (hereinafter the  
317 “old” Hawaiian *M. capitata* genome assembly) that was previously published by our group [16].  
318 The 14 largest scaffolds in the new assembly, ranging in size from ~22 to ~69 Mbp, likely  
319 represent the 14 chromosomes predicted in other *Montipora* species (Figs. 2A and B) [26]. These  
320 putative chromosomes total 680 Mbp of assembled sequence, which is only slightly larger than  
321 the estimated genome size of 644 Mbp (Fig. 2C; estimated by GenomeScope2 [53] using *k*-mers  
322 of size 21 bp). The estimated genome size of the other published *Montipora* species is ~700  
323 Mbp, whereas the estimated genome size of the new Hawaiian *M. capitata* genome is 644 Mbp  
324 (although the assembly is a little larger; see discussion below). This suggests that species in the  
325 genus *Montipora* have genomes that are marginally smaller than 700 Mbp in size.

326 The *M. capitata* isolate that was sequenced appears to be a diploid, with a good fit  
327 between its *k*-mer frequency histogram and the theoretical diploid model implemented in  
328 GenomeScope2 (black line in Fig. 2C and Supplementary Fig. S1A), and a clear “smudge”  
329 (bright yellow region in Supplementary Fig. S1A) of *k*-mer pairs with a coverage of 2n and a  
330 normalized coverage of 1/2; all of which suggests that the sample is diploid. nQuire also  
331 predicted that the *M. capitata* sample was a diploid (i.e., the diploid model had the lowest delta  
332 Log-Likelihood value; Supplementary Table S6), supporting the results of GenomeScope2 and  
333 Smudgeplot.

334 Compared with the old assembly, the new *M. capitata* assembly has a slightly higher  
335 BUSCO completeness for both the Metazoa (from 95.2% to 95.7%, respectively) and Eukaryota  
336 (from 97.7% to 99.2%, respectively) datasets but a significantly reduced number of duplicated  
337 BUSCO genes for both the Metazoa (from 21.2% to 1.6%, respectively) and Eukaryota (from  
338 22.0% to 1.2%, respectively) datasets (Fig. 3A and 3B; Supplementary Table S7). The high

339 number of duplicated BUSCO genes in the old assembly is likely a result of haplotigs that were  
340 not removed during the assembly process; this problem appears to have been resolved in the new  
341 assembly. Compared with the other published *Montipora* genomes, the new *M. capitata*  
342 assembly is the most contiguous and complete to date, with a significantly higher N50 (47.7 Mbp  
343 compared to the next best of 1.2 Mbp in *M. efflorescens*) and BUSCO completeness (e.g., 99.2%  
344 Eukaryota dataset completeness compared to the next best of 92.1% in *M. cactus*). Because the  
345 same PacBio and Illumina libraries were used to construct the new and old assemblies, the  
346 significant improvement observed in the new assembly is attributed to the use of a different  
347 hybrid assembly approach, combined with the Dovetail Omni-C library preparation and  
348 scaffolding with the HiRise (v2.2.0) software.

349

### 350 ***Pocillopora* genome assemblies**

351 The *Poc. acuta* genome assembly generated in this study (hereinafter the “Hawaiian *Poc. acuta*”)   
352 is larger (408 Mbp) than *Poc. acuta* from Indonesia (352 Mbp) [22] (Supplementary Table S7)   
353 and its estimated genome size of 353 Mbp (Fig. 2E). The size of the *Poc. meandrina* genome   
354 assembly generated in this study (377 Mbp) is comparable to that in the published Indonesian   
355 *Poc. acuta* (352 Mbp) [22] and *Poc. verrucosa* (381 Mbp) [21] species, but is larger than in *Poc.*   
356 *damicornis* (234 Mbp) [4] (Supplementary Table S7). Although the latter is likely under-   
357 assembled given its smaller size relative to the estimated genome size for that species. Moreover,   
358 the estimated genome sizes for these species appears to be around 330-350 Mbp, with the   
359 assemblies being 350-380 Mbp in size (excluding the Hawaiian *Poc. acuta* [see discussion   
360 below]). This suggests that species in the genus *Pocillopora* have genomes that are ~350 Mbp in   
361 size.

362 The Hawaiian *Poc. acuta* isolate that was sequenced is a triploid; the presence of three   
363 major peaks in the *k*-mer frequency histogram (at ~17x, ~35, and ~51x) which fit the triploid   
364 model implemented by GenomeScope2 (black line Fig. 2E and Supplementary Fig. S1F), and the   
365 clear “smudge” (bright yellow region in Supplementary Fig. S1F) of *k*-mer pairs with a coverage   
366 of ~3n and a normalized coverage of 1/3, all suggests that the sample is triploid. nQuire also   
367 predicts that the *Poc. acuta* is a triploid (Supplementary Table S6), supporting the results of   
368 GenomeScope2 and Smudgeplot. For *Poc. meandrina*, GenomeScope2 (Fig. 2D), Smudgeplot

369 (Supplementary Fig. S1E), and nQuire (Supplementary Table S6) all predict that the isolate that  
370 was sequenced is a diploid.

371 The BUSCO completeness of the Hawaiian *Poc. acuta* genome is improved for both the  
372 Metazoa (96.1%), and Eukaryota (98.5%) datasets compared to the Indonesian *Poc. acuta*  
373 assembly (89.4% and 91.4%, respectively) and the other *Pocillopora* assemblies (~91-95% and  
374 91-98%, respectively; Supplementary Table S7 and Fig. 3A and 3B). However, the Hawaiian  
375 assembly does have a slightly higher proportion of duplicated BUSCO genes (2.5% and 2.0% in  
376 the Metazoa and Eukaryota datasets) compared with some (the Indonesian *Poc. acuta* and *Poc.*  
377 *damicornis* genomes which have <1% in both datasets) but not all (the *Poc. verrucosa* genome  
378 which has 2.9% and 5.5%, respectively) of the published genomes. This is likely a result of the  
379 Hawaiian *Poc. acuta* being a triploid; haplotig removal programs (i.e., HaploMerger2 [40]) are  
380 generally designed for use with diploid species, therefore, it is unsurprising that they were unable  
381 to fully resolve the assembly given the added complexity associated with resolving assemblies of  
382 higher ploidy genomes. Regardless, the Hawaiian *Poc. acuta* assembly is more contiguous (i.e.,  
383 higher N50 and fewer scaffolds) than the other *Pocillopora* genomes and is the first assembly  
384 generated from a non-diploid coral. The *Poc. meandrina* genome has a BUSCO completeness  
385 (96.1% for the Metazoa and 98.8% for the Eukaryota datasets) that is just as high as the  
386 Hawaiian *Poc. acuta* genome, but with fewer duplicated BUSCO genes (1.2% and 0.4%,  
387 respectively), suggesting that this assembly has minimal retained haplotigs (Supplementary  
388 Table S7 and Fig. 3A and 3B).

389

### 390 ***Porites compressa* genome assembly**

391 The size of the *Por. compressa* genome assembly generated in this study (593 Mbp) is similar to  
392 the published *Por. australiensis* (576 Mbp) [24] and *Por. lutea* (552 Mbp) [23] genomes, and a  
393 little smaller than *Por. astreoides* (677 Mbp). The estimated genome sizes for these species  
394 appears to be around 525-550 Mbp (excluding *Por. astreoides*, *Por. lutea* and *Por. rus*), with the  
395 assemblies coming in at around 550-600 Mbp. The high number of duplicated BUSCO genes in  
396 the *Por. astreoides* assembly (11.5% and 14.9% for the Metazoa and Eukaryota datasets,  
397 respectively; Supplementary Table S7 and Fig. 3A and 3B) suggests that its larger assembly size  
398 (compared with the other *Porites* species) is likely explained by retained haplotigs. The genome  
399 assembly (470 Mbp) and estimated genome size (405 Mbp) of *Por. rus* is smaller than the other

400 *Porites* isolates however, these data were generated from holobiont samples (i.e., samples with  
401 both coral, algal symbiont, and associated bacteria DNA present) using a metagenomic binning  
402 strategy. The difference in this approach compared with how the other *Porites* genomes were  
403 processed likely explain the difference between the sizes. *Por. lutea* has an estimated genome  
404 size of 694 Mbp, which is significantly larger than the other *Porites* species and its assembled  
405 genome. Whereas this suggests that the *Por. lutea* genome is under-assembled (comprising only  
406 ~80% of the estimated genome) its relatively high completeness (95.3% and 98.5% for the  
407 Metazoa and Eukaryota datasets, respectively) suggests that the genome size has been  
408 overestimated, possibly driven by sequencing error or other factors associated with sample  
409 preparation or collection from the field. These results indicate that species in the genus *Porites*  
410 have genomes that are just under 600 Mbp in size. For *Por. compressa*, GenomeScope2 (Fig.  
411 2F), Smudgeplot (Supplementary Fig. S1I), and nQuire (Supplementary Table S6) all predict that  
412 the isolate sequenced is a diploid.

413 The BUSCO completeness of the *Por. compressa* assembly is slightly higher (95.5% for  
414 the Metazoa and 99.2% for the Eukaryota datasets) compared to the *Por. astreoides* (93.2% and  
415 98.0%, respectively), *Por. australiensis* (91.6% and 94.9%, respectively), *Por. lutea* (95.3% and  
416 98.5%, respectively), and *Por. rus* (69.6% and 67.1%, respectively) assemblies (Supplementary  
417 Table S7 and Fig. 3A and 3B), but has a much higher N50 (4 Mbp) compared to the published  
418 species (0.41, 0.55, 0.66, and 0.14 Mbp, respectively) and fewer scaffolds (608 vs. 3,051, 4,983,  
419 2,975, and 14,982, respectively). The published genome assemblies also have many more gaps  
420 (~0-29% of assembled bases are 'N' characters) compared to *Por. compressa* (0%),  
421 demonstrating that the new assembly is of equally high completeness compared to the published  
422 species, but with a much higher contiguity.

423

#### 424 **Predicted protein-coding genes**

425 For *M. capitata*, 54,384 protein-coding genes were predicted in the new assembly compared with  
426 63,227 predicted in the old version (Supplementary Table S7). In the new assembly, 56.68% of  
427 the predicted protein-coding genes were assigned putative functions using CD-Search, 44.26%  
428 using eggNOG-mapper, and 21.20% using KAAS (Supplementary Table S8). The reduction in  
429 the number of predicted genes in the new *M. capitata* assembly, compared with the published  
430 version, is likely driven by its reduced assembly size, with many of the missing genes likely

431 arising from haplotigs retained in the old assembly, that were removed in the new version. The  
432 BUSCO completeness of the predicted genes is improved in the new assembly (95.2% of the  
433 Metazoa and 96.5% for the Eukaryota BUSCO datasets; Fig. 3C and 3D) compared with the old  
434 assembly (94.0% and 93.3%, respectively), and the number of duplicated BUSCO genes is  
435 reduced in the new assembly (2.3% and 1.2%, respectively) compared to the published (18.2%  
436 and 18.8%, respectively). The predicted gene set from the new Hawaiian *M. capitata* assembly  
437 also has > 4.2% and > 3.5% more complete BUSCO genes (from the Metazoa and Eukaryota  
438 datasets, respectively) recovered compared to the other published isolates, demonstrating that the  
439 gene models predicted in the new assembly are also highly complete. Whereas increase in the  
440 number of genes predicted in the new Hawaiian *M. capitata* genome, compared with the  
441 published species, could be attributed to differences in the workflows used to predicted the genes  
442 in these species [31], it is also likely driven by the higher completeness and contiguity of the new  
443 genome assembly.

444         There are 33,730 predicted protein-coding genes in the Hawaiian *Poc. acuta* and 31,840  
445 in the *Poc. meandrina* genome assemblies, which is ~4,000–8,000 more than predicted in other  
446 *Pocillopora* species (Supplementary Table S7). In *Poc. acuta*, 67.76% of the predicted protein-  
447 coding genes were assigned putative functions using CD-Search, 49.76% using eggNOG-  
448 mapper, and 32.35% using KAAS, and in *Poc. meandrina*, 69.44% of the predicted protein-  
449 coding genes were assigned putative functions using CD-Search, 51.76% using eggNOG-  
450 mapper, and 33.66% using KAAS (Supplementary Table S8). The number of complete BUSCO  
451 genes from the Metazoa and Eukaryota BUSCO datasets is > 6% higher in the new Hawaiian  
452 *Poc. acuta* and *Poc. meandrina* species than in the other *Pocillopora* species; the Hawaiian *Poc.*  
453 *acuta* also has 29.6% and 31.3% (respectively) more complete BUSCO genes recovered than the  
454 Indonesian *Poc. acuta* (Supplementary Table S7; Fig. 3C and 3D). The number of duplicated  
455 BUSCO genes is > 0.7% and > 2.3% (respectively) higher in the Hawaiian *Poc. acuta* gene set  
456 compared with the published *Pocillopora* species however, this was expected given the increased  
457 size of the genome assembly. The proportion of fragmented BUSCO genes is > 0.9% and > 2%  
458 lower (Metazoa and Eukaryota BUSCO datasets, respectively) lower in the Hawaiian  
459 *Pocillopora* species compared with the published species. The average transcript length and the  
460 number of CDSs per transcript of the Hawaiian *Pocillopora* genes (~1,350 bp and ~6.6,  
461 respectively) are congruent with the predicted genes of the published *Pocillopora* species

462 (~1,100–1,900 bp and ~5.5-7.5, respectively). This suggests that the higher number of predicted  
463 genes in the Hawaiian *Pocillopora* species is not caused by the presence of haplotigs in the  
464 genome assembly, although this likely contributes to the slightly higher number of duplicated  
465 BUSCO genes in the Hawaiian *Poc. acuta*, or by the presence of fragmented genes models,  
466 because the number of fragmented BUSCO genes and the gene statistics suggest that the  
467 majority are full length. Therefore, the higher number of predicted genes in this species can be  
468 (at least partially) attributed to the more complete and contiguous genome assemblies of the  
469 Hawaiian *Pocillopora* species relative to published species.

470         There are 44,130 predicted protein-coding genes in the Hawaiian *Por. compressa* genome  
471 assembly (Supplementary Table S7), which is > 8,000 more genes than predicted in the *Por.*  
472 *australiensis* (35,910) and *Por. lutea* (31,126) genomes, 4,677 more than in the *Por. rus* (39,453)  
473 genome, and 20,506 less than in the *Por. astreoides* (64,636) genome. In *Por. compressa*,  
474 63.91% of the predicted protein-coding genes were assigned putative functions using CD-Search,  
475 46.22% using eggNOG-mapper, and 27.48% using KAAS (Supplementary Table S8). The  
476 number of complete BUSCO genes from the Metazoa and Eukaryota BUSCO datasets is > 4%  
477 higher in *Por. compressa* than in the published *Porites* species (Supplementary Table S7; Fig. 3C  
478 and 3D). The number of duplicated BUSCO genes in *Por. compressa* is similar to *Por. lutea* and  
479 *Por. rus* but lower than in *Por. astreoides* and *Por. australiensis*, and the number of fragmented  
480 BUSCO genes in *Por. compressa* is much lower (> 1.9% and > 5.1%, respectively) than in the  
481 published species. As with the previous Hawaiian genomes, we attribute the higher number of  
482 predicted genes in this species to a more complete and contiguous assembly, relative to the  
483 published data.

484

#### 485 **Similarity between *Montipora capitata* chromosomal and extra-chromosomal scaffolds**

486 There are 1,685 scaffolds (totaling ~101 Mbp) in the new *M. capitata* assembly that were not  
487 placed into the 14 putative chromosomes by the scaffolding software. Given that the size of the  
488 14 chromosomal sequences totals ~680 Mbp, which is close to the estimated genome size of 644  
489 Mbp, it is possible that the extra-chromosomal sequences represent retained haplotigs. To  
490 explore this issue, we compared the predicted genes in the extra-chromosomal (6,545 protein-  
491 coding genes) and chromosomal (47,839) scaffolds to determine how similar the protein content  
492 is between the two sets of scaffolds and to see if the extra-chromosomal proteins tend to be



493 contained within a single chromosome, suggesting that they are likely to be retained haplotigs.  
494 Out of the 6,546 proteins encoded in the extra-chromosomal scaffolds, 3,896 (59.53%) have hits  
495 to chromosomal proteins with > 75% query coverage and > 75% identity, and 1,623 (24.80%)  
496 have hits to chromosomal proteins with > 95% query coverage and > 95% identity. This suggests  
497 that whereas the two sets of scaffolds encode many similar (although not identical) proteins, the  
498 protein inventory of the extra chromosomal scaffolds only partially overlaps with the gene  
499 inventory of the chromosomal scaffolds (we would expect them to have a high level of overlap if  
500 they were haplotigs). Furthermore, the extra-chromosomal scaffolds encode 12% of the total  
501 predicted genes but, when analyzed separately using BUSCO, have only 1.9% of the Metazoa  
502 and 1.6% of the Eukaryota BUSCO genes recovered. This conflict between the number of  
503 predicted genes in the scaffolds and the number of BUSCO genes suggests that these scaffolds  
504 cannot be easily explained as unresolved haplotigs. Finally, of the 3,896 proteins with top hits in  
505 the leniently filtered dataset (hit with > 75% query coverage and > 75% identity), 2,748  
506 (70.53%) were on scaffolds with other proteins with top hits to different chromosomes. This  
507 suggests that the extra-chromosomal scaffolds have significant structural differences when  
508 compared to the chromosomes. These results suggest that the extra-chromosomal scaffolds do  
509 not comprise retained haplotigs however, given their significant size, which increases the  
510 assembly size well above the estimated size, additional analyses will need to be done to  
511 determine the placement of these sequences in the chromosomes and the genes they encode.

512

### 513 **Potential implications**

514 The substantial improvement in the contiguity and completeness of the assemblies and predicted  
515 genes from the Hawaiian *M. capitata*, *Poc. meandrina*, *Poc. acuta*, and *Por. compressa* species  
516 will enable many follow-up studies. The chromosome-level assembly of the *M. capitata* isolate  
517 will not only serve as a key reference genome for future population studies focusing on this  
518 species in Hawaii, but it will also enable more detailed studies on genome content (such as  
519 repeats), gene content, and gene synteny with other species from reefs across the world. The *Poc.*  
520 *acuta* genome, although not at chromosome-level resolution, is the most complete available for  
521 this genus and will be a valuable model for not only comparative analysis, but for analysis of  
522 ploidy in corals. As the first assembly ever generated from a non-diploid coral, this data will  
523 open up new questions surrounding the role of ploidy in coral evolution and adaptation and how

524 this phenomenon is involved in the lifecycle of this species and potentially other *Pocillopora*  
525 species, both in Hawai‘i and other reefs across the world. These questions are critical, because an  
526 understanding of how changes in ploidy evolve in these corals, particularly in response to stress,  
527 will help us model the response of these ecosystems to anthropogenic climate change, and may  
528 even provide a new avenue of research for the development of stress resistant “super” corals.

529

### 530 **Data availability**

531 The SRA Run IDs of the Omni-C data generated from the Hawaiian *M. capitata*, the PacBio and  
532 Illumina genome data used for genome assembly, and the RNA-seq data used for gene prediction  
533 are listed in Supplementary Table S1 for each species. The genome assemblies, predicted genes,  
534 and functional annotations for the Hawaiian *M. capitata* is available at Rutgers’s website [59],  
535 for *Poc. acuta* at Rutgers’s website [60], *Poc. meandrina* at Rutgers’s website [61], *Por.*  
536 *compressa* at Rutgers’s website [62]. The data from the other *Montipora*, *Pocillopora*, and  
537 *Porites* species used in this study are available from their respective repositories listed in  
538 Supplementary Table S5. Supporting data and materials are available in the GigaDB database  
539 [63], with individual datasets for *M. capitata* [64], *P. acuta* [65], *P. meandrina* [66] and *P.*  
540 *compressa* [67].

541

### 542 **Additional Files**

543 **Supplementary Figure S1.** GenomeScope2 (left) and Smudgeplot (right) profiles for (A)  
544 Hawaiian *M. capitata* (this study), (B) Waiopae tide pools *M. capitata*, (C) *M. cactus*, (D) *M.*  
545 *efflorescens*, (E) *Poc. meandrina* (this study), (F) Hawaiian *Poc. acuta* (this study), (G)  
546 Indonesian *Poc. acuta*, (H) *Poc. verrucosa*, (I) *Por. compressa* (this study), (J) *Por.*  
547 *australiensis*, and (K) *Por. lutea*. The profiles were computed for each species using 21-mers  
548 generated from the trimmed short-read data listed in Supplementary Table S5.

549

### 550 **Abbreviations**

551 bp: base pairs

552 BUSCO: Benchmarking Universal Single-Copy Orthologs

553 Gbp: gigabase pairs

554 HM2: HaploMerger2

555 Kbp: Kilobase pairs  
556 Mbp: megabase pairs  
557 NCBI: National Center for Biotechnology Information  
558 PacBio: Pacific BioSciences  
559 SRA: Sequencing Read Archive

560

## 561 **Conflict of Interests**

562 The authors declare that they have no other competing interests.

563

## 564 **Funding**

565 This work was supported by the National Science Foundation grant NSF-OCE 1756616, the  
566 Catalyst Science Fund grant 2020-008, the National Institute of Food and Agriculture and United  
567 States Department of Agriculture Hatch grant NJ01180, and the National Aeronautics and Space  
568 Administration grant 80NSSC19K0462 awarded to DB. DB and HSY were also supported by the  
569 Collaborative Genome Program of the Korea Institute of Marine Science and Technology  
570 Promotion (KIMST) funded by the Ministry of Oceans and Fisheries (MOF) (20180430). JML  
571 was supported by research grants from the National Research Foundation of Korea [NRF,  
572 2020R1C1C1010193 (JML)] and ‘The project to make multi-ministerial national biological  
573 research resources more advanced’ program through the Korea Environment Industry &  
574 Technology Institute (KEITI) funded by the Korea Ministry of Environment [MOE  
575 (2021003420004)]. HMP was supported by the USDA National Institute of Food and  
576 Agriculture, Hatch Formula project accession number 1017848 and the National Science  
577 Foundation grant NSF-OCE 1756623. EM was supported by the Paul G. Allen Family  
578 Foundation.

579

## 580 **Author contributions**

581 DB conceived the project with HMP and JML. TGS, JML, and YJJ did the bioinformatic  
582 analyses, HSY provided sequencing resources, and HMP led the coral sample collection and  
583 processing with EM. TGS wrote the manuscript draft with JML, and all authors commented on  
584 and approved the submitted version.

585

586 **Acknowledgements**

587 We acknowledge support from the research and administrative staff at the Hawai‘i Institute of  
588 Marine Biology where some of this work was done.

589

590 **References**

- 591 1. van Oppen MJH, Koolmees EM and Veron JEN. Patterns of evolution in the scleractinian  
592 coral genus *Montipora* (Acroporidae). *Marine Biology*. 2004;144 1:9-18.  
593 doi:10.1007/s00227-003-1188-3.
- 594 2. Forsman ZH, Concepcion GT, Haverkort RD, Shaw RW, Maragos JE and Toonen RJ.  
595 Ecomorph or endangered coral? DNA and microstructure reveal hawaiian species  
596 complexes: *Montipora dilatata/flabellata/turgescens* & *M. patula/verrilli*. *PLoS One*.  
597 2010;5 12:e15021. doi:10.1371/journal.pone.0015021.
- 598 3. Schmidt-Roach S, Miller KJ, Lundgren P and Andreakis N. With eyes wide open: A  
599 revision of species within and closely related to the *Pocillopora damicornis* species  
600 complex (Scleractinia; Pocilloporidae) using morphology and genetics. *Zoological*  
601 *Journal of the Linnean Society*. 2014;170 1:1-33. doi:doi.org/10.1111/zoj.12092.
- 602 4. Cunning R, Bay RA, Gillette P, Baker AC and Traylor-Knowles N. Comparative analysis  
603 of the *Pocillopora damicornis* genome highlights role of immune system in coral  
604 evolution. *Sci Rep*. 2018;8 1:16134. doi:10.1038/s41598-018-34459-8.
- 605 5. Williams A, Pathmanathan JS, Stephens TG, Su X, Chiles EN, Conetta D, et al. Multi-  
606 omic characterization of the thermal stress phenome in the stony coral *Montipora*  
607 *capitata*. *PeerJ*. 2021;9:e12335. doi:10.7717/peerj.12335.
- 608 6. Mayfield AB, Chen YJ, Lu CY and Chen CS. The proteomic response of the reef coral  
609 *Pocillopora acuta* to experimentally elevated temperatures. *PLoS One*. 2018;13  
610 1:e0192001. doi:10.1371/journal.pone.0192001.
- 611 7. Henley EM, Quinn M, Bouwmeester J, Daly J, Zuchowicz N, Lager C, et al.  
612 Reproductive plasticity of Hawaiian *Montipora* corals following thermal stress. *Sci Rep*.  
613 2021;11 1:12525. doi:10.1038/s41598-021-91030-8.
- 614 8. Putnam HM, Davidson JM and Gates RD. Ocean acidification influences host DNA  
615 methylation and phenotypic plasticity in environmentally susceptible corals. *Evol Appl*.  
616 2016;9 9:1165-78. doi:10.1111/eva.12408.
- 617 9. Jury CP, Delano MN and Toonen RJ. High heritability of coral calcification rates and  
618 evolutionary potential under ocean acidification. *Sci Rep*. 2019;9 1:20419.  
619 doi:10.1038/s41598-019-56313-1.
- 620 10. Padilla-Gamino JL, Pochon X, Bird C, Concepcion GT and Gates RD. From parent to  
621 gamete: vertical transmission of *Symbiodinium* (Dinophyceae) ITS2 sequence  
622 assemblages in the reef building coral *Montipora capitata*. *PLoS One*. 2012;7 6:e38440.  
623 doi:10.1371/journal.pone.0038440.
- 624 11. Damjanovic K, Menendez P, Blackall LL and van Oppen MJH. Mixed-mode bacterial  
625 transmission in the common brooding coral *Pocillopora acuta*. *Environ Microbiol*.  
626 2020;22 1:397-412. doi:10.1111/1462-2920.14856.

- 627 12. Cunha RL, Forsman ZH, Belderok R, Knapp ISS, Castilho R and Toonen RJ. Rare coral  
628 under the genomic microscope: timing and relationships among Hawaiian *Montipora*.  
629 BMC Evol Biol. 2019;19 1:153. doi:10.1186/s12862-019-1476-2.
- 630 13. Johnston EC, Forsman ZH, Flot JF, Schmidt-Roach S, Pinzon JH, Knapp ISS, et al. A  
631 genomic glance through the fog of plasticity and diversification in *Pocillopora*. Sci Rep.  
632 2017;7 1:5991. doi:10.1038/s41598-017-06085-3.
- 633 14. Aurelle D, Pratlong M, Oury N, Haguenaer A, Gélin P, Magalon H, et al. Population  
634 genomics of *Pocillopora* corals: insights from RAD-sequencing. 2021-10-12 2021.
- 635 15. Caruso C, de Souza MR, Ruiz-Jones L, Conetta D, Hancock J, Hobbs C, et al. Genetic  
636 patterns in *Montipora capitata* across an environmental mosaic in Kāneʻohe Bay.  
637 bioRxiv. 2021:2021.10.07.463582. doi:10.1101/2021.10.07.463582.
- 638 16. Shumaker A, Putnam HM, Qiu H, Price DC, Zelzion E, Harel A, et al. Genome analysis  
639 of the rice coral *Montipora capitata*. Sci Rep. 2019;9 1:2571. doi:10.1038/s41598-019-  
640 39274-3.
- 641 17. Shinzato C, Khalturin K, Inoue J, Zayasu Y, Kanda M, Kawamitsu M, et al. Eighteen  
642 coral genomes reveal the evolutionary origin of *Acropora* strategies to accommodate  
643 environmental changes. Molecular Biology and Evolution. 2021;38 1:16-30.  
644 doi:10.1093/molbev/msaa216.
- 645 18. Helmkamp M, Bellinger MR, Geib S, Sim SB and Takabayashi M. Draft genome of the  
646 rice coral *Montipora capitata* obtained from linked-read sequencing. Genome Biol Evol.  
647 2019;11 7:2045-54. doi:10.1093/gbe/evz135.
- 648 19. Yuki Y, Go S, Yuna Z, Hiroshi Y and Chuya S. Comparative genomics highlight the  
649 importance of lineage-specific gene families in evolutionary divergence of the coral  
650 genus, *Montipora*. BMC Ecology and Evolution. 2021; doi:10.21203/rs.3.rs-944849/v1.
- 651 20. Parra G, Bradnam K and Korf I. CEGMA: A pipeline to accurately annotate core genes  
652 in eukaryotic genomes. Bioinformatics. 2007;23 9:1061-7.  
653 doi:10.1093/bioinformatics/btm071.
- 654 21. Buitrago-Lopez C, Mariappan KG, Cardenas A, Gegner HM and Voolstra CR. The  
655 genome of the cauliflower coral *Pocillopora verrucosa*. Genome Biol Evol. 2020;12  
656 10:1911-7. doi:10.1093/gbe/evaa184.
- 657 22. Vidal-Dupiol J, Chaparro C, Pratlong M, Pontarotti P, Grunau C and Mitta G.  
658 Sequencing, *de novo* assembly and annotation of the genome of the scleractinian coral,  
659 *Pocillopora acuta*. bioRxiv. 2020:698688. doi:10.1101/698688.
- 660 23. Robbins SJ, Singleton CM, Chan CX, Messer LF, Geers AU, Ying H, et al. A genomic  
661 view of the reef-building coral *Porites lutea* and its microbial symbionts. Nat Microbiol.  
662 2019;4 12:2090-100. doi:10.1038/s41564-019-0532-4.
- 663 24. Shinzato C, Takeuchi T, Yoshioka Y, Tada I, Kanda M, Broussard C, et al. Whole-  
664 genome sequencing highlights conservative genomic strategies of a stress-tolerant, long-  
665 lived scleractinian coral, *Porites australiensis* Vaughan, 1918. Genome Biol Evol.  
666 2021;13 12 doi:10.1093/gbe/evab270.
- 667 25. Wong KH and Putnam HM. The genome of the mustard hill coral, *Porites astreoides*.  
668 GIGabyte. 2022; doi:10.46471/gigabyte.65.
- 669 26. Kenyon JC. Models of reticulate evolution in the coral genus *Acropora* based on  
670 chromosome numbers: Parallels with plants. Evolution. 1997;51 3:756-67.  
671 doi:10.1111/j.1558-5646.1997.tb03659.x.

- 672 27. Nurk S, Walenz BP, Rhie A, Vollger MR, Logsdon GA, Grothe R, et al. HiCanu:  
673 accurate assembly of segmental duplications, satellites, and allelic variants from high-  
674 fidelity long reads. *Genome Res.* 2020;30 9:1291-305. doi:10.1101/gr.263566.120.
- 675 28. Walker BJ, Abeel T, Shea T, Priest M, Abouelliel A, Sakthikumar S, et al. Pilon: an  
676 integrated tool for comprehensive microbial variant detection and genome assembly  
677 improvement. *PLoS One.* 2014;9 11:e112963. doi:10.1371/journal.pone.0112963.
- 678 29. Bolger AM, Lohse M and Usadel B. Trimmomatic: A flexible trimmer for Illumina  
679 sequence data. *Bioinformatics.* 2014;30 15:2114-20. doi:10.1093/bioinformatics/btu170.
- 680 30. Marcais G and Kingsford C. A fast, lock-free approach for efficient parallel counting of  
681 occurrences of *k*-mers. *Bioinformatics.* 2011;27 6:764-70.  
682 doi:10.1093/bioinformatics/btr011.
- 683 31. Chen YB, Gonzalez-Pech RA, Stephens TG, Bhattacharya D and Chan CX. Evidence  
684 that inconsistent gene prediction can mislead analysis of dinoflagellate genomes. *J*  
685 *Phycol.* 2020;56 1:6-10. doi:10.1111/jpy.12947.
- 686 32. Dougan KE, Bellantuono AJ, Kahlke T, Abbriano RM, Chen Y, Shah S, et al. Whole-  
687 genome duplication in an algal symbiont serendipitously confers thermal tolerance to  
688 corals. *bioRxiv.* 2022:2022.04.10.487810. doi:10.1101/2022.04.10.487810.
- 689 33. Li T, Yu L, Song B, Song Y, Li L, Lin X, et al. Genome improvement and core gene set  
690 refinement of *Fugacium kawagutii*. *Microorganisms.* 2020;8 1  
691 doi:10.3390/microorganisms8010102.
- 692 34. González-Pech RA, Stephens TG, Chen Y, Mohamed AR, Cheng Y, Shah S, et al.  
693 Comparison of 15 dinoflagellate genomes reveals extensive sequence and structural  
694 divergence in family Symbiodiniaceae and genus *Symbiodinium*. *BMC Biology.* 2021;19  
695 1:73. doi:10.1186/s12915-021-00994-6.
- 696 35. Nand A, Zhan Y, Salazar OR, Aranda M, Voolstra CR and Dekker J. Genetic and spatial  
697 organization of the unusual chromosomes of the dinoflagellate *Symbiodinium*  
698 *microadriaticum*. *Nat Genet.* 2021;53 5:618-29. doi:10.1038/s41588-021-00841-y.
- 699 36. Quinlan AR and Hall IM. BEDTools: A flexible suite of utilities for comparing genomic  
700 features. *Bioinformatics.* 2010;26 6:841-2. doi:10.1093/bioinformatics/btq033.
- 701 37. Benson G. Tandem repeats finder: a program to analyze DNA sequences. *Nucleic Acids*  
702 *Res.* 1999;27 2:573-80. doi:10.1093/nar/27.2.573.
- 703 38. Bao Z and Eddy SR. Automated de novo identification of repeat sequence families in  
704 sequenced genomes. *Genome Res.* 2002;12 8:1269-76. doi:10.1101/gr.88502.
- 705 39. Price AL, Jones NC and Pevzner PA. De novo identification of repeat families in large  
706 genomes. *Bioinformatics.* 2005;21 Suppl 1:i351-8. doi:10.1093/bioinformatics/bti1018.
- 707 40. Huang S, Kang M and Xu A. HaploMerger2: Rebuilding both haploid sub-assemblies  
708 from high-heterozygosity diploid genome assembly. *Bioinformatics.* 2017;33 16:2577-9.  
709 doi:10.1093/bioinformatics/btx220.
- 710 41. Simao FA, Waterhouse RM, Ioannidis P, Kriventseva EV and Zdobnov EM. BUSCO:  
711 assessing genome assembly and annotation completeness with single-copy orthologs.  
712 *Bioinformatics.* 2015;31 19:3210-2. doi:10.1093/bioinformatics/btv351.
- 713 42. Haas BJ, Papanicolaou A, Yassour M, Grabherr M, Blood PD, Bowden J, et al. *De novo*  
714 transcript sequence reconstruction from RNA-seq using the Trinity platform for reference  
715 generation and analysis. *Nat Protoc.* 2013;8 8:1494-512. doi:10.1038/nprot.2013.084.

- 716 43. Grabherr MG, Haas BJ, Yassour M, Levin JZ, Thompson DA, Amit I, et al. Full-length  
717 transcriptome assembly from RNA-Seq data without a reference genome. *Nat Biotechnol.*  
718 2011;29 7:644-52. doi:10.1038/nbt.1883.
- 719 44. Dobin A, Davis CA, Schlesinger F, Drenkow J, Zaleski C, Jha S, et al. STAR: Ultrafast  
720 universal RNA-seq aligner. *Bioinformatics.* 2013;29 1:15-21.  
721 doi:10.1093/bioinformatics/bts635.
- 722 45. Bruna T, Hoff KJ, Lomsadze A, Stanke M and Borodovsky M. BRAKER2: Automatic  
723 eukaryotic genome annotation with GeneMark-EP+ and AUGUSTUS supported by a  
724 protein database. *NAR Genom Bioinform.* 2021;3 1:lqaa108.  
725 doi:10.1093/nargab/lqaa108.
- 726 46. Lomsadze A, Burns PD and Borodovsky M. Integration of mapped RNA-Seq reads into  
727 automatic training of eukaryotic gene finding algorithm. *Nucleic Acids Res.* 2014;42  
728 15:e119. doi:10.1093/nar/gku557.
- 729 47. Stanke M, Keller O, Gunduz I, Hayes A, Waack S and Morgenstern B. AUGUSTUS: *Ab*  
730 *initio* prediction of alternative transcripts. *Nucleic Acids Res.* 2006;34 Web Server  
731 issue:W435-9. doi:10.1093/nar/gkl200.
- 732 48. Marchler-Bauer A, Bo Y, Han L, He J, Lanczycki CJ, Lu S, et al. CDD/SPARCLE:  
733 functional classification of proteins via subfamily domain architectures. *Nucleic Acids*  
734 *Res.* 2017;45 D1:D200-D3. doi:10.1093/nar/gkw1129.
- 735 49. Huerta-Cepas J, Forslund K, Coelho LP, Szklarczyk D, Jensen LJ, von Mering C, et al.  
736 Fast Genome-Wide Functional Annotation through Orthology Assignment by eggNOG-  
737 Mapper. *Molecular Biology and Evolution.* 2017;34 8:2115-22.  
738 doi:10.1093/molbev/msx148.
- 739 50. Moriya Y, Itoh M, Okuda S, Yoshizawa AC and Kanehisa M. KAAS: an automatic  
740 genome annotation and pathway reconstruction server. *Nucleic Acids Research.*  
741 2007;35:W182-W5. doi:10.1093/nar/gkm321.
- 742 51. Celis JS, Wibberg D, Ramirez-Portilla C, Rupp O, Sczyrba A, Winkler A, et al. Binning  
743 enables efficient host genome reconstruction in cnidarian holobionts. *Gigascience.*  
744 2018;7 7 doi:10.1093/gigascience/giy075.
- 745 52. Perteua G and Perteua M. GFF Utilities: GffRead and GffCompare [version 1; peer review:  
746 2 approved]. *F1000Research.* 2020;9 304 doi:10.12688/f1000research.23297.1.
- 747 53. Ranallo-Benavidez TR, Jaron KS and Schatz MC. GenomeScope 2.0 and Smudgeplot for  
748 reference-free profiling of polyploid genomes. *Nat Commun.* 2020;11 1:1432.  
749 doi:10.1038/s41467-020-14998-3.
- 750 54. Martin M. Cutadapt removes adapter sequences from high-throughput sequencing reads.  
751 *EMBnetjournal.* 2011;17 1:3. doi:10.14806/ej.17.1.200.
- 752 55. Weiss CL, Pais M, Cano LM, Kamoun S and Burbano HA. nQuire: A statistical  
753 framework for ploidy estimation using next generation sequencing. *BMC Bioinformatics.*  
754 2018;19 1:122. doi:10.1186/s12859-018-2128-z.
- 755 56. Danecek P, Bonfield JK, Liddle J, Marshall J, Ohan V, Pollard MO, et al. Twelve years  
756 of SAMtools and BCFtools. *Gigascience.* 2021;10 2 doi:10.1093/gigascience/giab008.
- 757 57. Manni M, Berkeley MR, Seppey M, Simão FA and Zdobnov EM. BUSCO Update:  
758 Novel and streamlined workflows along with broader and deeper phylogenetic coverage  
759 for scoring of eukaryotic, prokaryotic, and viral genomes. *Molecular Biology and*  
760 *Evolution.* 2021; doi:10.1093/molbev/msab199.

761 58. Camacho C, Coulouris G, Avagyan V, Ma N, Papadopoulos J, Bealer K, et al. BLAST+:  
762 Architecture and applications. *BMC Bioinformatics*. 2009;10:421. doi:10.1186/1471-  
763 2105-10-421.

764 59. Genome data for *Montipora capitata* from <http://cyanophora.rutgers.edu/montipora/>  
765 (Version 3).

766 60. Genome data for *Pocillopora acuta* from [http://cyanophora.rutgers.edu/Pocillopora\\_acuta/](http://cyanophora.rutgers.edu/Pocillopora_acuta/)  
767 (Version 2).

768 61. Genome data for *Pocillopora meandrina* from  
769 [http://cyanophora.rutgers.edu/Pocillopora\\_meandrina/](http://cyanophora.rutgers.edu/Pocillopora_meandrina/) (Version 1).

770 62. Genome data for *Porites compressa* from  
771 [http://cyanophora.rutgers.edu/Porites\\_compressa/](http://cyanophora.rutgers.edu/Porites_compressa/) (Version 1).

772 63. Stephens TG, Lee J, Jeong Y, Yoon HS, Putnam HM, Majerová E, et al. Supporting data  
773 for "High-quality genome assemblies from key Hawaiian coral species" GigaScience  
774 Database. 2022. <http://dx.doi.org/10.5524/102259>.

775 64. Stephens TG, Lee J, Jeong Y, Yoon HS, Putnam HM, Majerová E, et al. Chromosome-  
776 level genome assembly of *Montipora capitata* GigaScience Database. 2022.  
777 <http://dx.doi.org/10.5524/102268>

778 65. Stephens TG, Lee J, Jeong Y, Yoon HS, Putnam HM, Majerová E, et al. Genome  
779 assembly of a triploid *Pocillopora acuta* GigaScience Database.  
780 2022. <http://dx.doi.org/10.5524/102269>

781 66. Stephens TG, Lee J, Jeong Y, Yoon HS, Putnam HM, Majerová E, et al. Genome  
782 assembly of *Pocillopora meandrina* GigaScience Database. 2022.  
783 <http://dx.doi.org/10.5524/102270>

784 67. Stephens TG, Lee J, Jeong Y, Yoon HS, Putnam HM, Majerová E, et al. Genome  
785 assembly of *Porites compressa* GigaScience Database. 2022.  
786 <http://dx.doi.org/10.5524/102271>

787

788



789 **Tables**

790 **Table S1:** Summary of read data used for genome assembly and gene prediction.

791

792 **Table S2:** Summary of coral assemblies before and after haplotype merging.

793

794 **Table S3:** List of Symbiodiniaceae genomes used to assess symbiont contamination in the coral  
795 genome assemblies.

796

797 **Table S4:** Top 10 BLASTn hits against the NCBI's nt database for regions of coral scaffolds  
798 with greater than a given coverage of hits to Symbiodiniaceae assembled genomes.

799

800 **Table S5:** Metadata for the genome and gene models downloaded for the coral species used for  
801 comparative analysis.

802

803 **Table S6:** Results from nQuire lrdmodel ploidy estimation for the Hawaiian coral genomes  
804 analyzed in this study.

805

806 **Table S7:** Comparison between the published *Montipora*, *Pocillopora*, and *Porites* genomes and  
807 those generated in this study. All statistics were calculated in this study using the available  
808 genome and gene models.

809

810 **Table S8:** Number of predicted protein-coding genes in each of the new Hawaiian coral  
811 genomes with functional annotations.

812

813 **Figure Legends**

814 **Figure 1:** Diagram depicting the genome assembly, gene prediction, and functional annotation  
815 workflow deployed in this study to assemble each of the new Hawaiian coral genomes. Programs  
816 are presented in green boxes and datasets in dark orange boxes, arrows show the flow of data  
817 through the workflow. Major input and output datasets are highlighted with bold text.

818

819 **Figure 2:** (A) Cumulative and (B) individual length of scaffolds in the new Hawaiian *M.*  
820 *capitata* genome assembly. Scaffolds were sorted by length in descending order; each point  
821 along the x-axis of (A) and (B) represents a scaffold, with the longest scaffold being the first and  
822 the shortest being the last on the x-axis of each plot. In (A) and (B) a zoomed-in section of the  
823 larger plot (indicated by a green bar along the x-axis) is shown on the right highlighting the 40  
824 largest scaffolds; a horizontal red line in (A) shows the total assembled bases in the new genome  
825 and a vertical dashed line in (A) and (B) is positioned after the 14th largest scaffold.

826 GenomeScope2 linear *k*-mer distributions of the Hawaiian (C) *M. capitata*, (D) *Poc. meandrina*,  
827 (E) *Poc. acuta*, and (F) *Por. compressa* species with theoretical diploid (or triploid for *Poc.*  
828 *acuta*) models shown by the black lines. The GenomeScope2 profiles were computed for each  
829 species using 21-mers generated from the trimmed short-read data listed in Supplementary Table  
830 S5.

831

832 **Figure 3:** Results from BUSCO analysis run using the genomes and predicted genes from all  
833 published (including this study) *Montipora*, *Pocillopora*, and *Porites* species, plus the old  
834 version of the *M. capitata* genome that our group published in 2019 [16]. BUSCO results for  
835 each species using the (A) Metazoa dataset (genome mode), (B) Eukaryota dataset (genome  
836 mode), (C) Metazoa dataset (protein mode), and (D) Eukaryota dataset (protein mode).

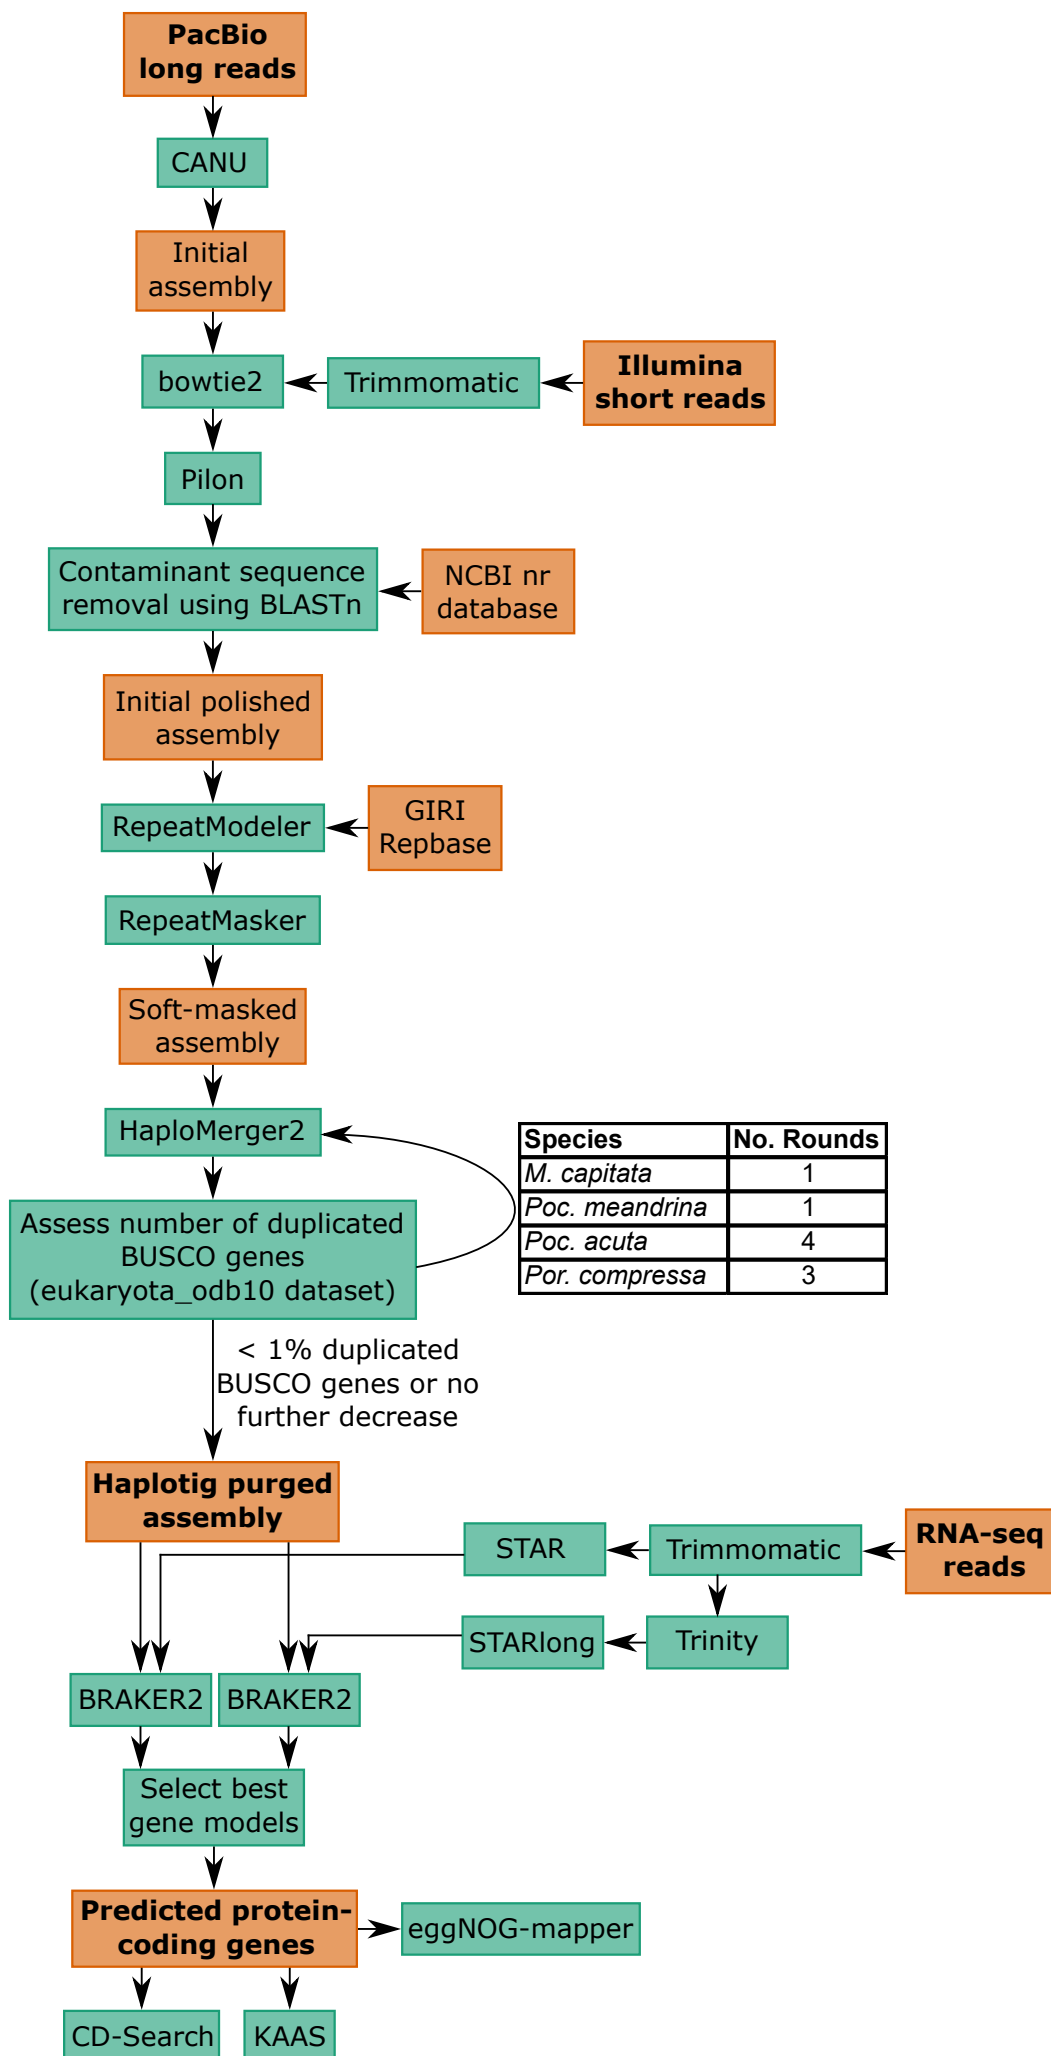

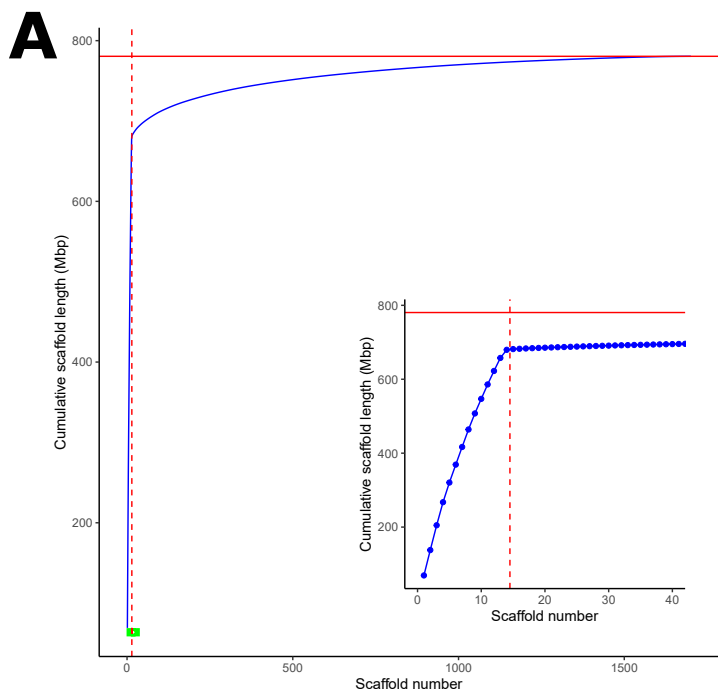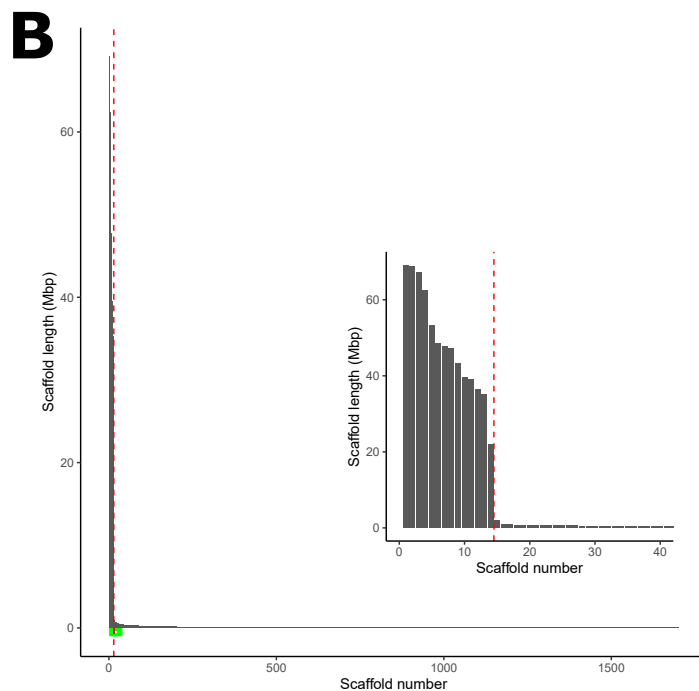

**C**

*M. capitata*

GenomeScope Profile

len:644,226,330bp uniq:50.9%  
aa:98.6% ab:1.36%  
kcov:14.7 err:0.228% dup:0.733 k:21 p:2

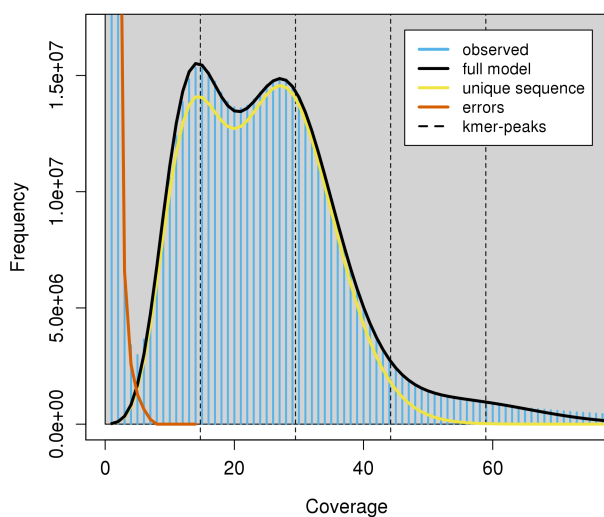

**D**

*P. meandrina*

GenomeScope Profile

len:349,144,232bp uniq:66.4%  
aa:98.5% ab:1.5%  
kcov:32.2 err:0.156% dup:0.337 k:21 p:2

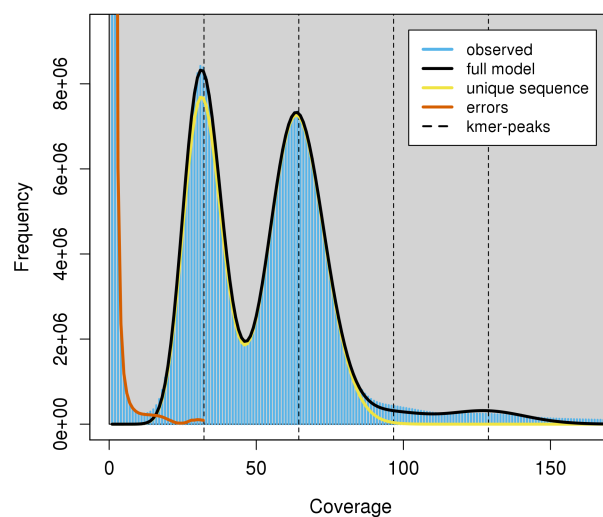

**E**

*P. acuta*

GenomeScope Profile

len:353,080,882bp uniq:65.3%  
aaa:97.3% aab:2.4% abc:0.308%  
kcov:17.7 err:0.228% dup:0.347 k:21 p:3

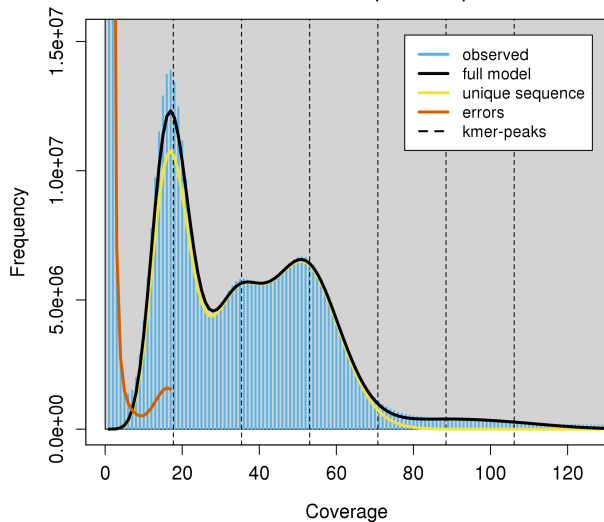

**F**

*P. compressa*

GenomeScope Profile

len:527,906,982bp uniq:58.7%  
aa:98.2% ab:1.84%  
kcov:13.9 err:0.303% dup:0.384 k:21 p:2

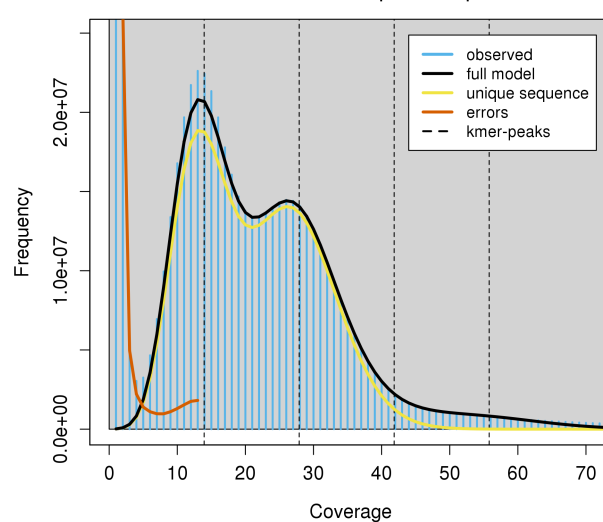

Figure 3

## BUSCO Metazoa dataset (Genome mode)

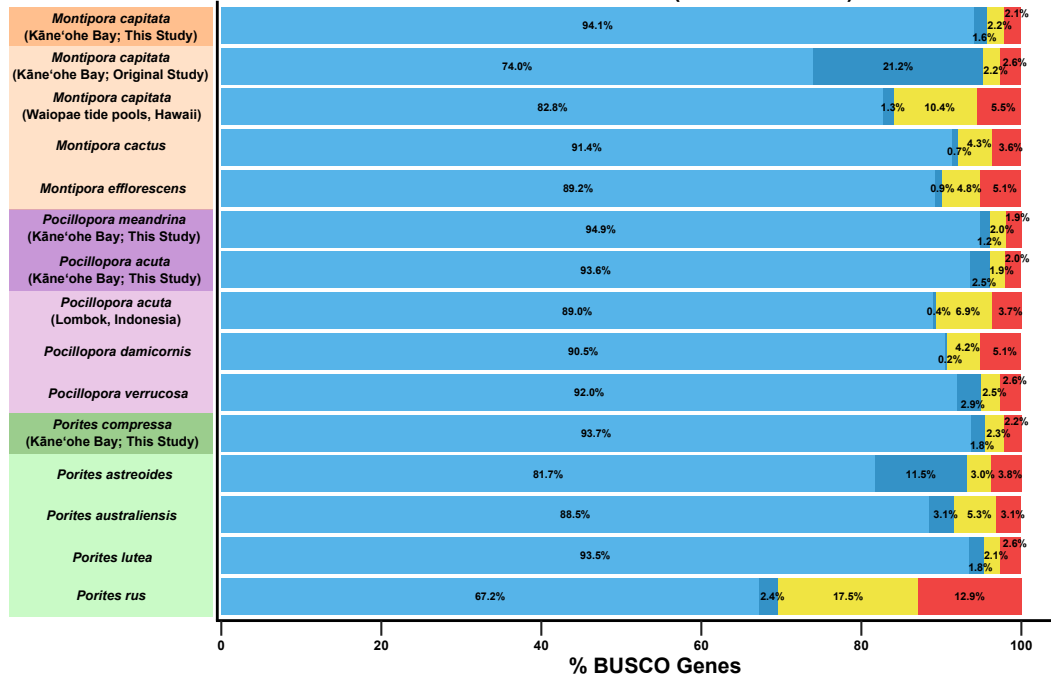

## BUSCO Eukaryota dataset (Genome mode)

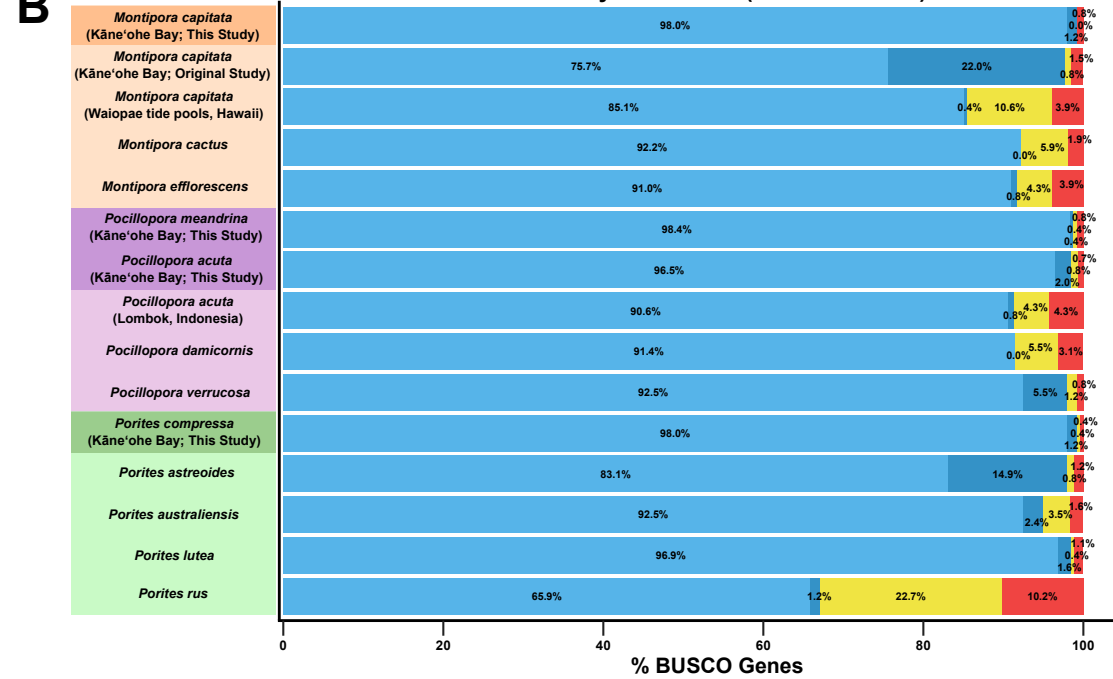

## BUSCO Metazoa dataset (Protein mode)

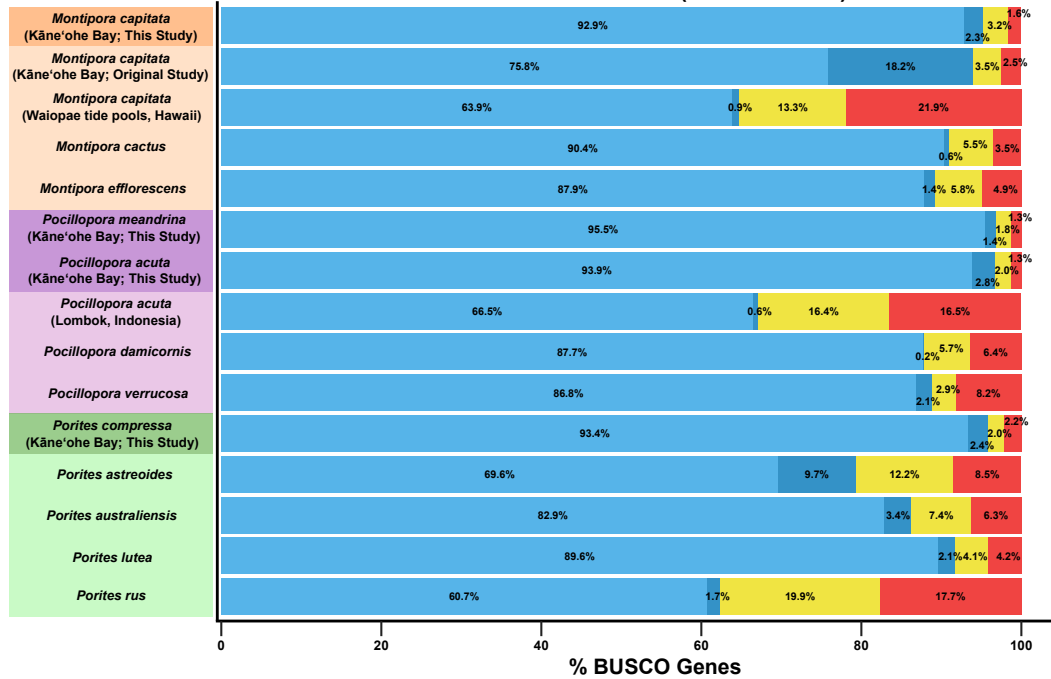

## BUSCO Eukaryota dataset (Protein mode)

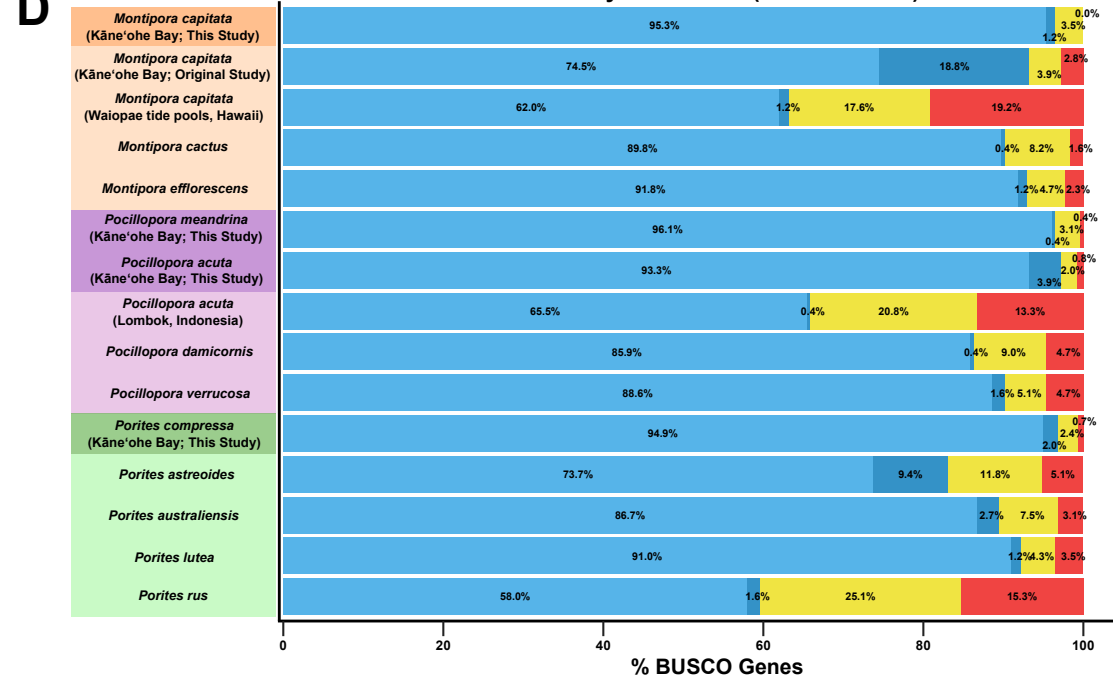

Complete (C) and single-copy (S) Complete (C) and duplicated (D) Fragmented (F) Missing (M)



Click here to access/download  
**Supplementary Material**  
Supplementary\_Tables.xlsx





Click here to access/download  
**Supplementary Material**  
Figure\_S1.pdf
